# Supplementary material for: Integrative differential expression and gene set enrichment analysis using summary statistics for scRNA-seq studies
Source: PubMed Central journal article supplement (PMC7101316; doi:10.1038/s41467-020-15298-6), 2020-03-27
Supplement: 41467_2020_15298_MOESM2_ESM.pdf [file 41467_2020_15298_MOESM2_ESM.pdf]

## Supplementary Information

# Integrative Differential Expression and Gene Set Enrichment Analysis Using Summary Statistics for scRNA-seq Studies

Ma, Sun et al.

## Supplementary Figures

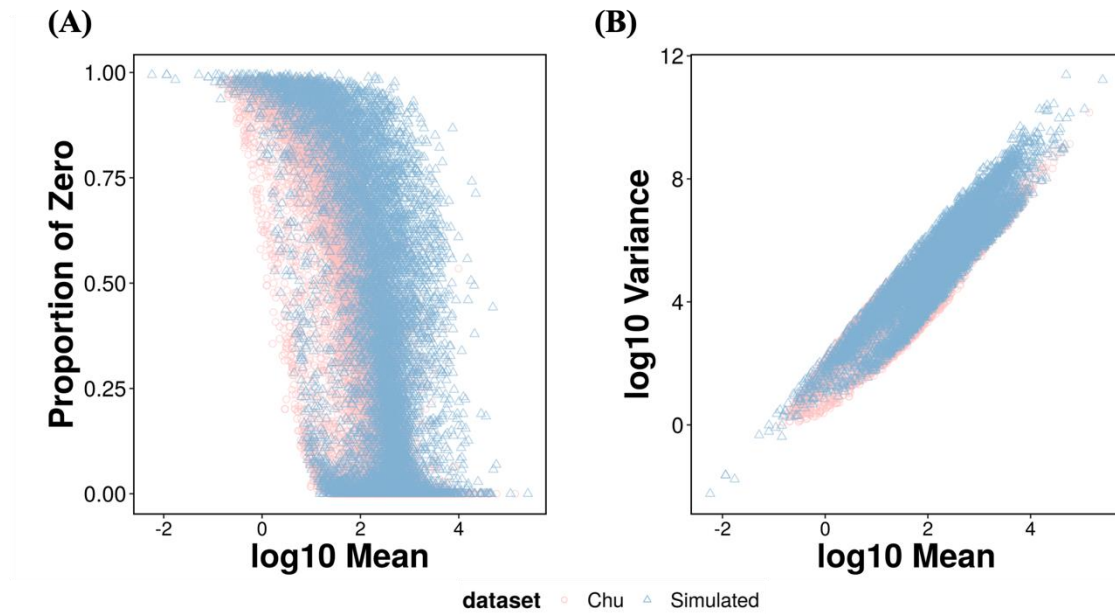

**Supplementary Figure 1. Simulated data has very similar characteristics as compared to the real scRNA-seq dataset.** The data was simulated under the following parameters setting:  $\tau_0 = -2$ ,  $\tau_1 = 0.5$  and  $CR = 10\%$ . Proportion of zero versus mean under log10 scale for both simulated data (blue) and real data (pink) (A); Mean-variance plot under log10 scale for both simulated data (blue) and real data (pink) (B);

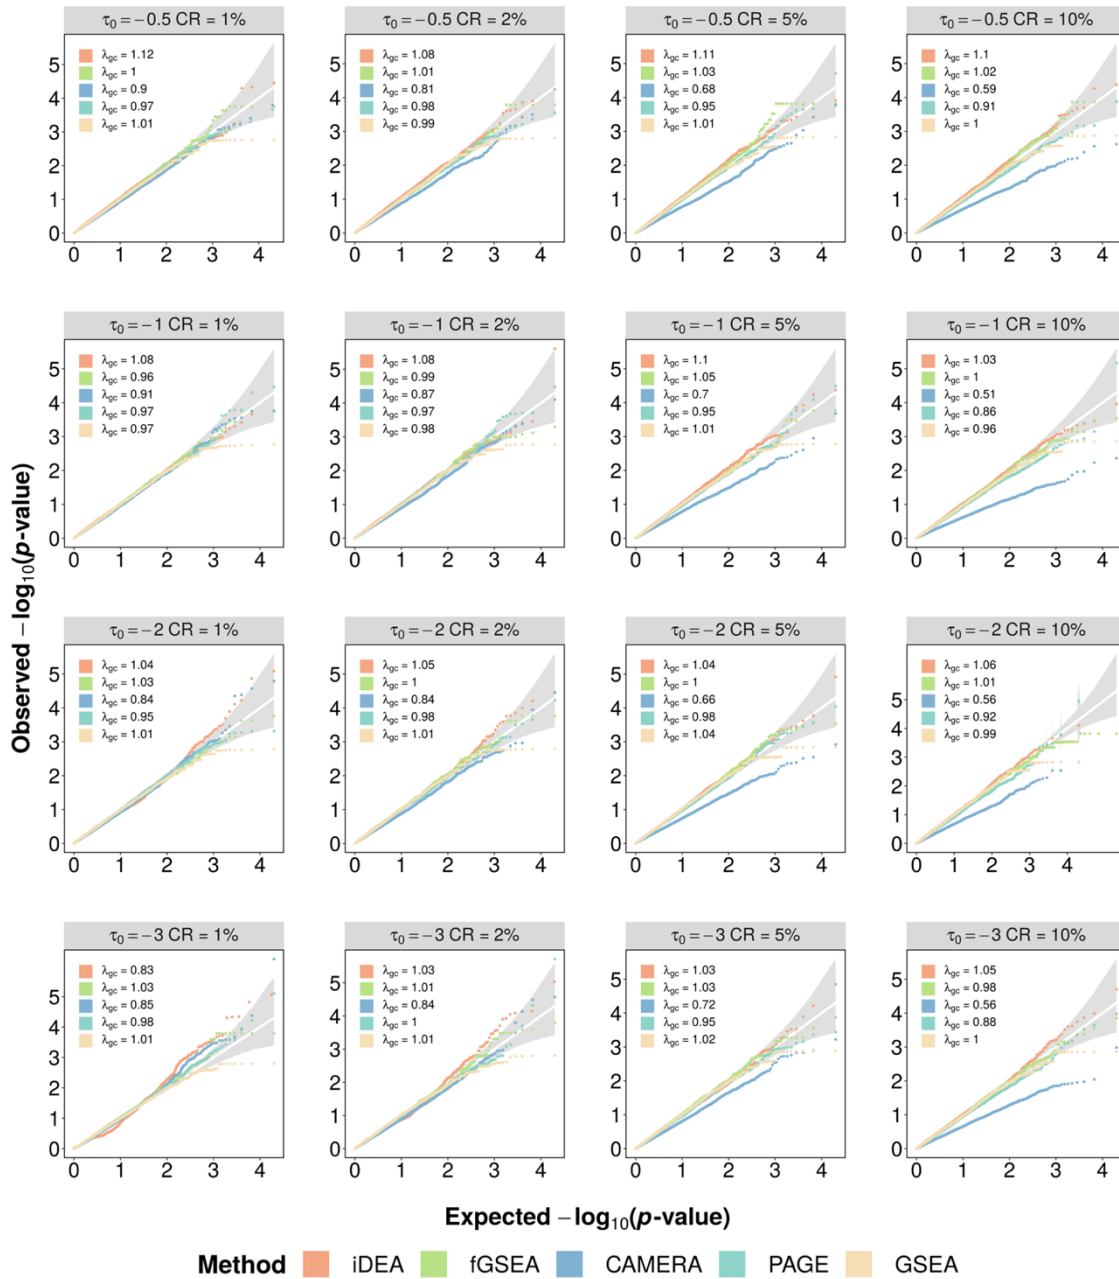

**Supplementary Figure 2. iDEA produces well-calibrated  $p$ -values for gene set enrichment analysis under null simulation.** Quantile-quantile plots of  $-\log_{10}(p\text{-values})$  from iDEA (orange), fGSEA (green), CAMERA (navyblue), PAGE (skyblue) and GSEA (yellow) are shown under different null scenarios with varying number of DE genes (denoted by the odd parameter  $\tau_0$ ;  $-0.5$ ,  $-1.0$ ,  $-2.0$ , or  $-3.0$ ) and gene set coverage rates (CR; 1%, 2%, 5% or 10%). CR represents the percentage of genes inside the gene set.  $\lambda_{gc}$  is genomic control factor.

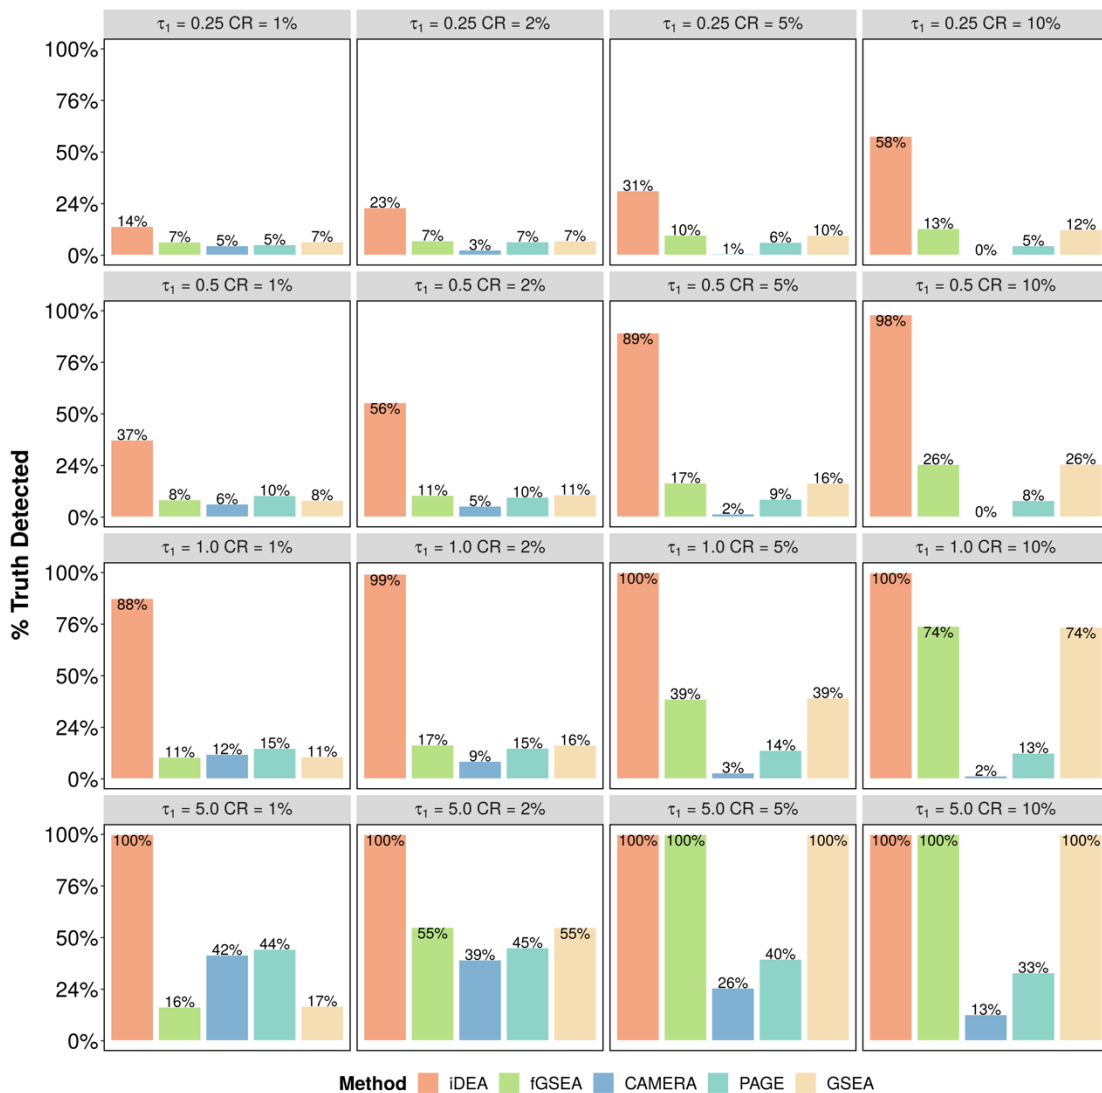

**Supplementary Figure 3. iDEA is more powerful than GSE methods for identifying enriched gene sets under alternative simulations.** The power plots from iDEA (orange), fGSEA (green), CAMERA (navyblue), PAGE (skyblue) and GSEA (yellow) are shown under different scenarios with varying gene set enrichment coefficient (denoted by the odd parameter  $\tau_1$ ; 0.25, 0.5, 1.0 or 5.0) and gene set coverage rates (CR; 1%, 2%, 5% or 10%). CR represents the percentage of genes inside the gene set. Here, power was calculated based on an FDR of 5%.

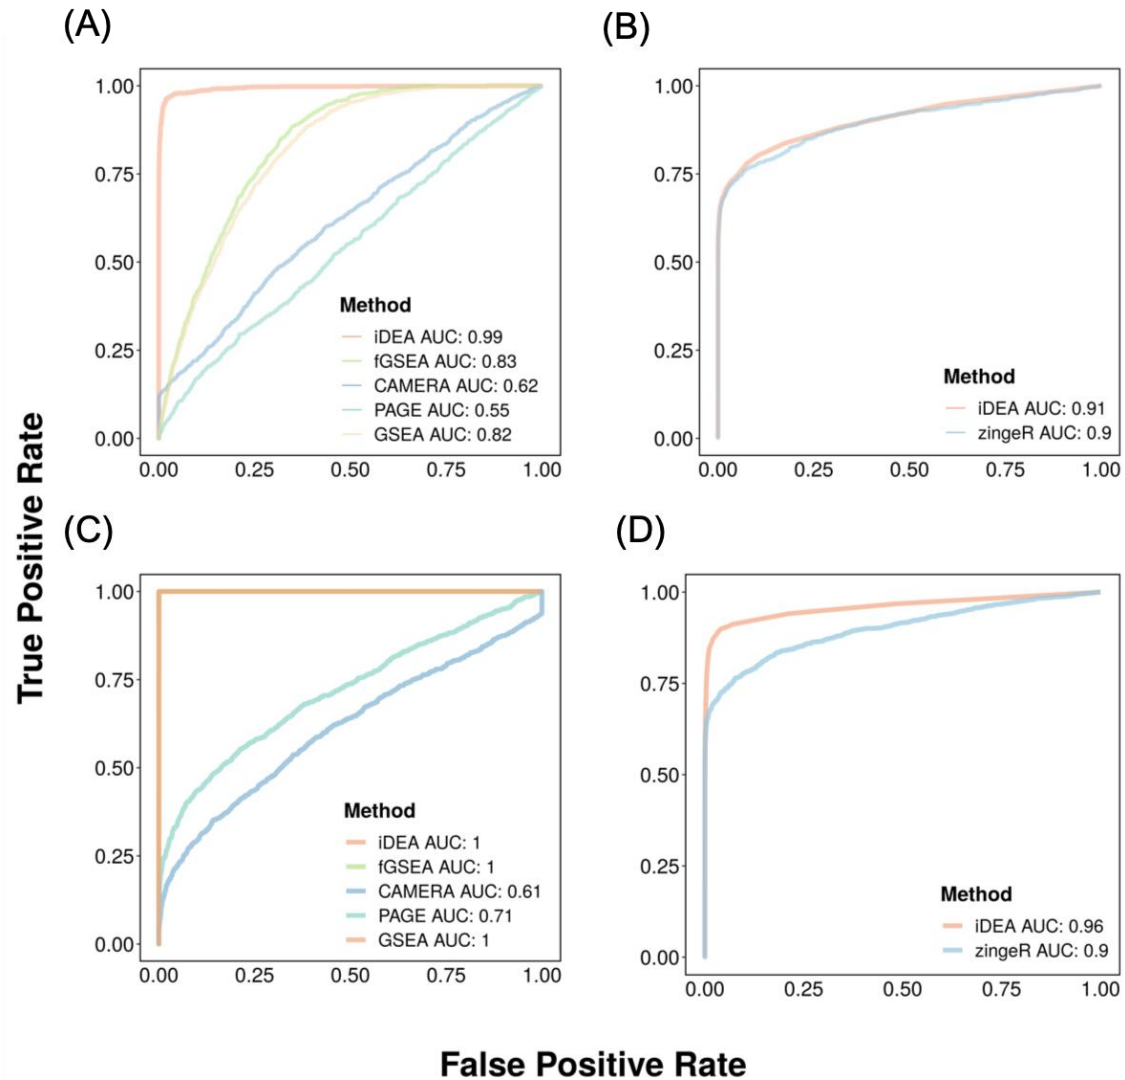

**Supplementary Figure 4. iDEA is more powerful for both GSE and DE analyses than existing approaches in power simulations.** The AUC of iDEA in identifying enriched pathways (**A** and **C**) and in identifying differentially expressed genes (**B** and **D**) are higher than that of the other methods. The compared GSE methods (**A** and **C**) include iDEA (orange), fGSEA (green), CAMERA (navyblue), PAGE (skyblue) and GSEA (yellow). The compared DE methods (**B** and **D**) include iDEA (orange) and zingeR (skyblue). Simulations are performed under two parameter settings:  $\tau_0 = -2$ ,  $\tau_1 = 0.5$ , and CR = 10% (**A** and **B**);  $\tau_0 = -2$ ,  $\tau_1 = 5$ , and CR = 10% (**C** and **D**).

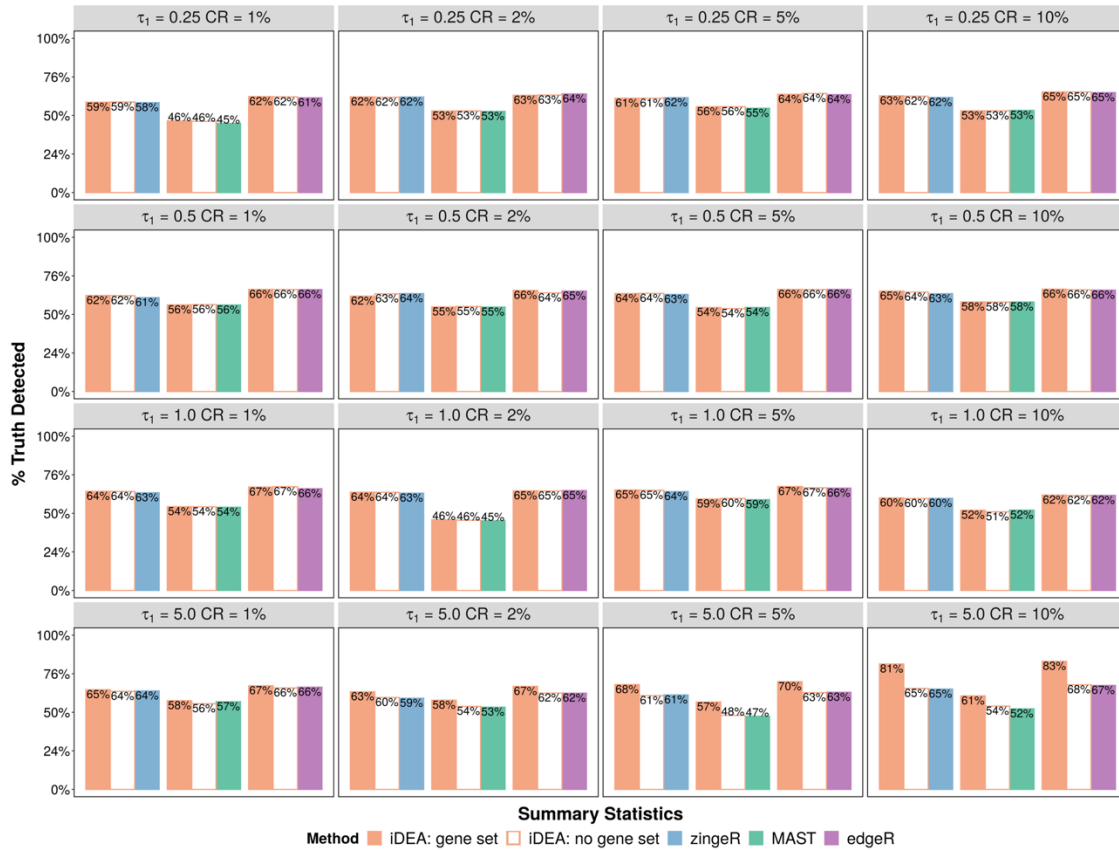

**Supplementary Figure 5. iDEA is more powerful than DE methods for identifying DE genes under alternative simulations when gene set enrichment parameter is larger.** Simulations were performed on one fixed scRNA-seq data set with  $\tau_0 = -2$ , varying  $\tau_1$  and CR.  $\tau_1$  is set to be 0.25, 0.5, 1.0 or 5.0 and CR is set to be 1%, 2%, 5%, 10% respectively. In each simulation setting, power of DE results between common DE method (zingeR (blue), MAST (green), edgeR (purple)) and iDEA (orange) with summary statistics obtained from that corresponding DE method when adding simulated gene set (filling color) or not (not filling color) is plotted. Here, power was calculated based on an FDR of 5%.

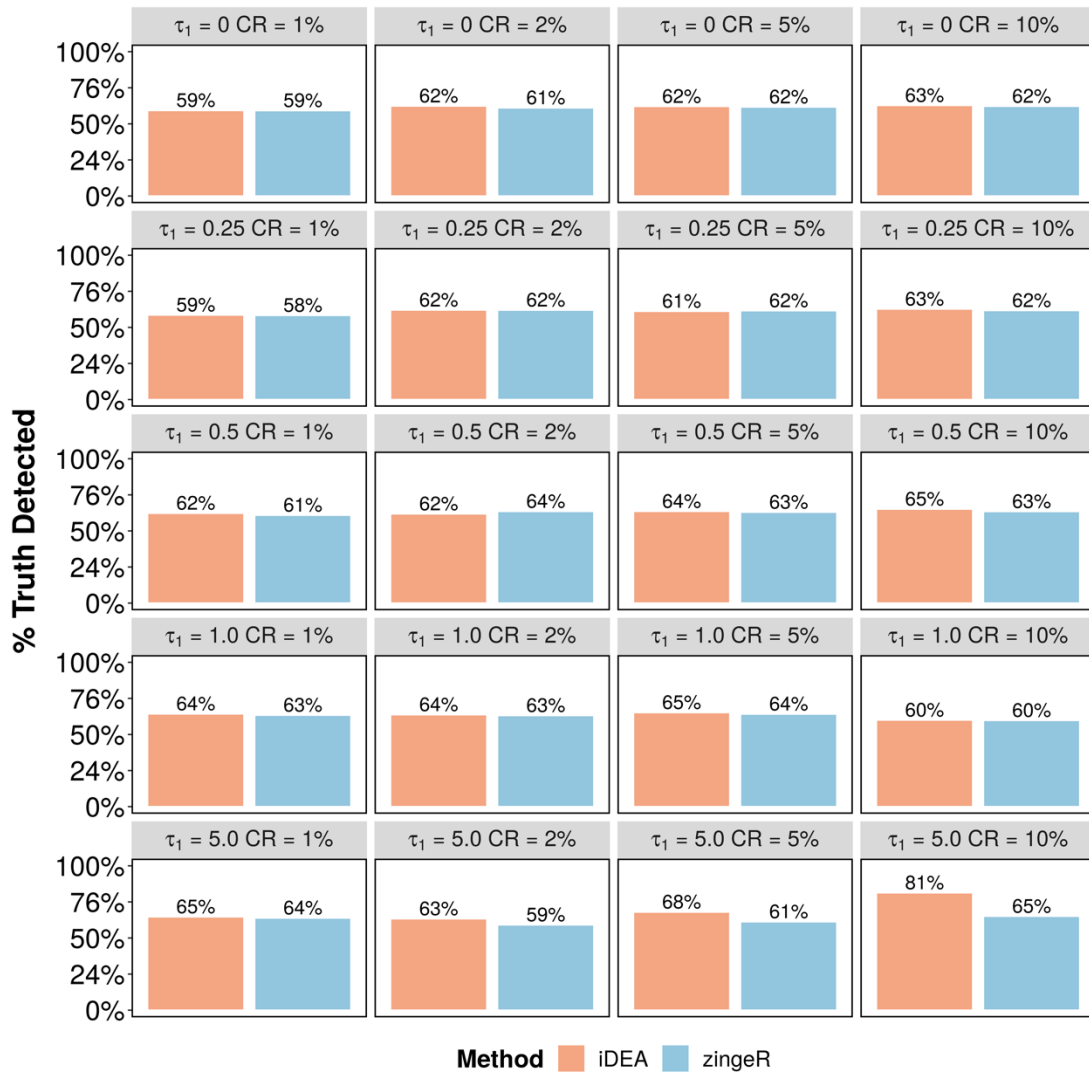

**Supplementary Figure 6. iDEA provides the powerful performance on DE analysis when varying gene set enrichment coefficient  $\tau_1$  and coverage rate CR than zingeR especially when gene set enrichment parameter is higher.** The data were simulated based on the parameter setting  $\tau_0 = -2$ ,  $\tau_1 = 0, 0.25, 0.5, 1.0$  or  $5.0$  and CR = 1%, 2%, 5% or 10%. iDEA identifies more significant gene sets on simulation studies when varying parameters. CR represents the percentage of genes inside the gene set. Here, power was calculated based on an FDR of 5%.

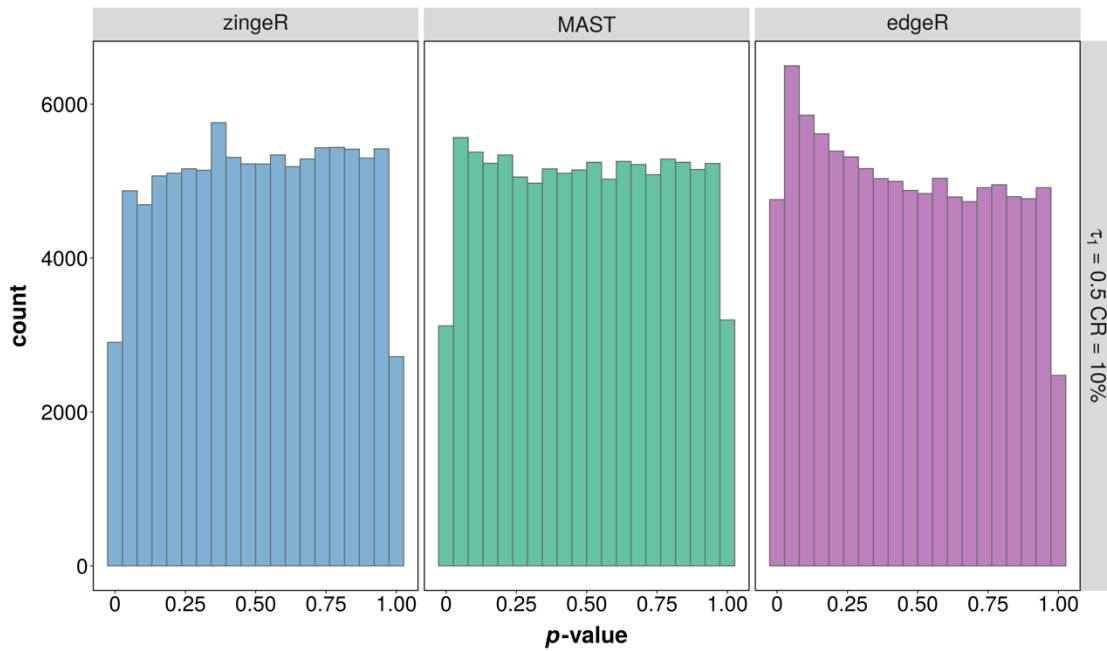

**Supplementary Figure 7. Distribution of marginal DE  $p$ -values from common DE methods.** The data were simulated based on the parameter setting  $\tau_0 = -2$ ,  $\tau_1 = 0.5$  and CR = 10%.  $P$ -values from zingeR (blue) and MAST (green) follow approximately a uniform distribution under the null while  $P$ -values from edgeR (purple) does not.



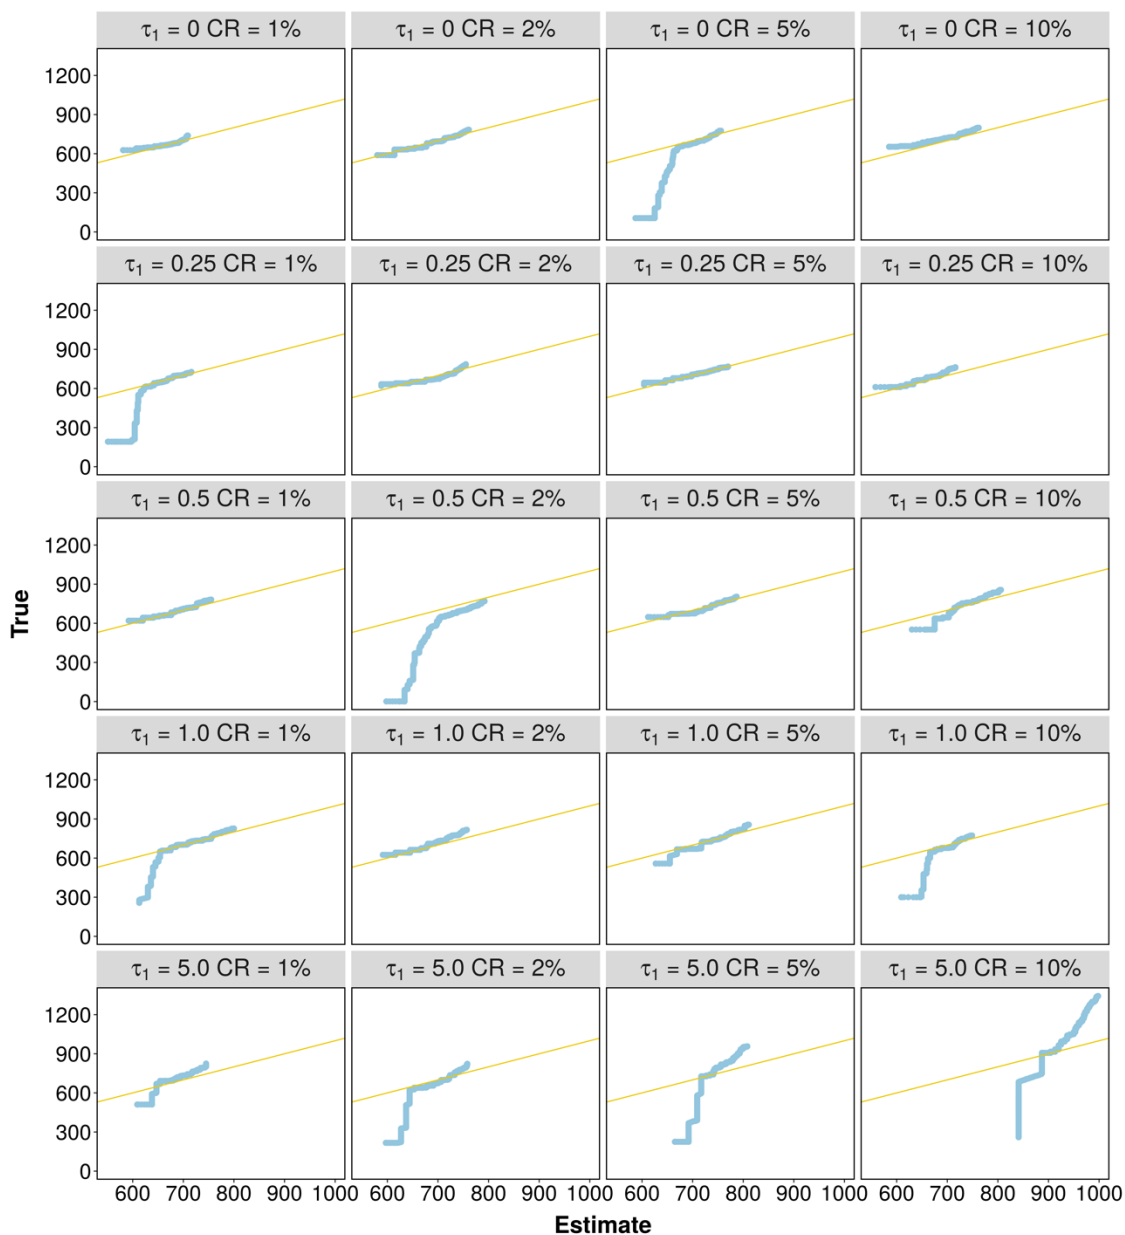

**Supplementary Figure 8. iDEA produces calibrated (or slightly conservative) FDR estimates.** Simulations were performed on one fixed scRNA-seq data set with  $\tau_0 = -2$ , varying  $\tau_1$  and CR.  $\tau_1$  is set to be 0, 0.25, 0.5, 1.0 or 5.0 and CR is set to be 1%, 2%, 5%, 10% respectively. In each simulation setting, the scatterplot plot showed the number of detected signals based on true FDR (y-axis) versus the number of detected signals based on estimated FDR (x-axis). The yellow line is the reference line which represents  $y = x$ .

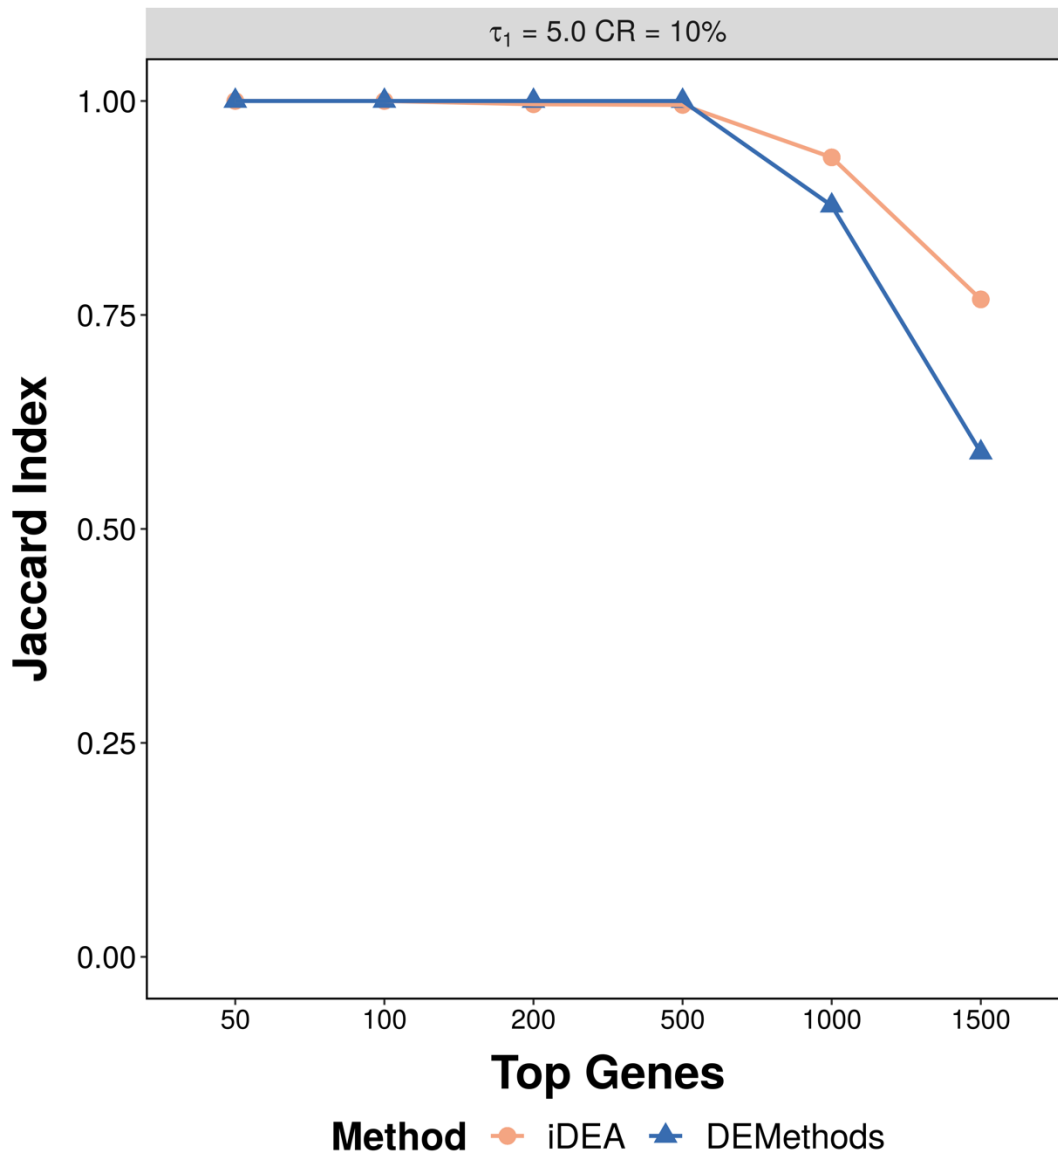

**Supplementary Figure 9. iDEA displays high consistency in detecting DE genes in simulations.** The data were simulated based on the parameter setting  $\tau_0 = -2$ ,  $\tau_1 = 5$ , and CR = 10%. The plot shows the Jaccard index for top DE genes between zingeR, edgeR and MAST (blue) and the Jaccard index for top DE genes between iDEA when using summary statistics from zingeR, edgeR and MAST respectively (orange). CR represents the percentage of genes inside the gene set,  $\tau_0$  represents number of DE genes and  $\tau_1$  represents the gene set enrichment coefficient.

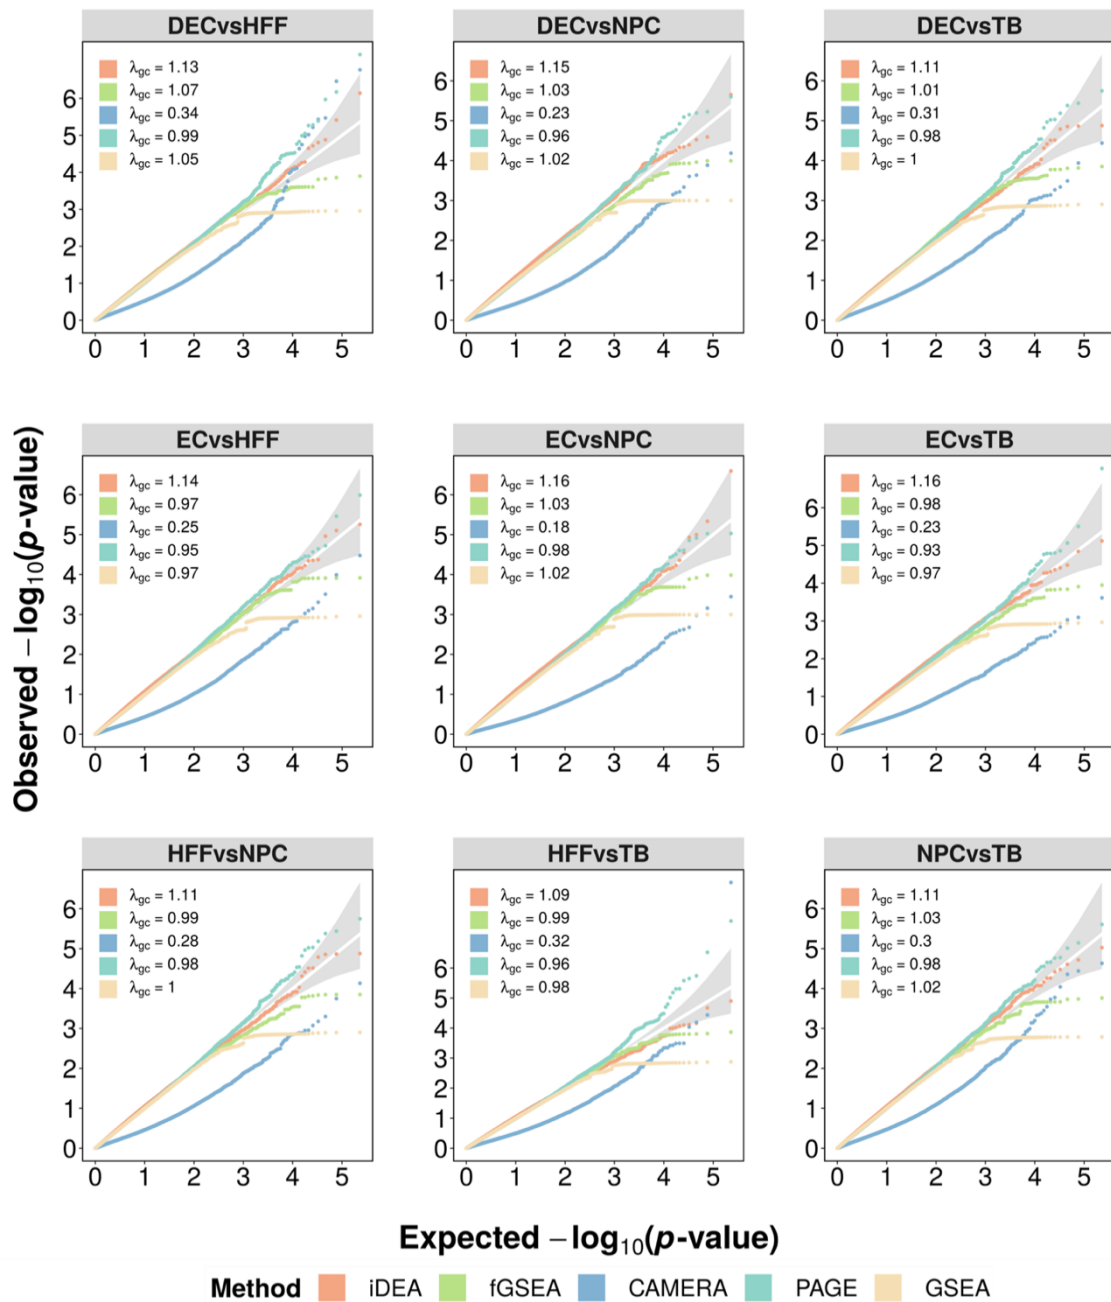

**Supplementary Figure 10. iDEA produces well-calibrated  $p$ -values in pairwise cell type comparison on human embryonic stem cell scRNA-seq data.** Quantile-quantile plots of  $-\log_{10}(p\text{-values})$  from iDEA (orange), fGSEA (green), CAMERA (navyblue), PAGE (skyblue) and GSEA (yellow) are shown under the null that permuted each gene set 10 times correspondingly.  $\lambda_{gc}$  is genomic control factor.

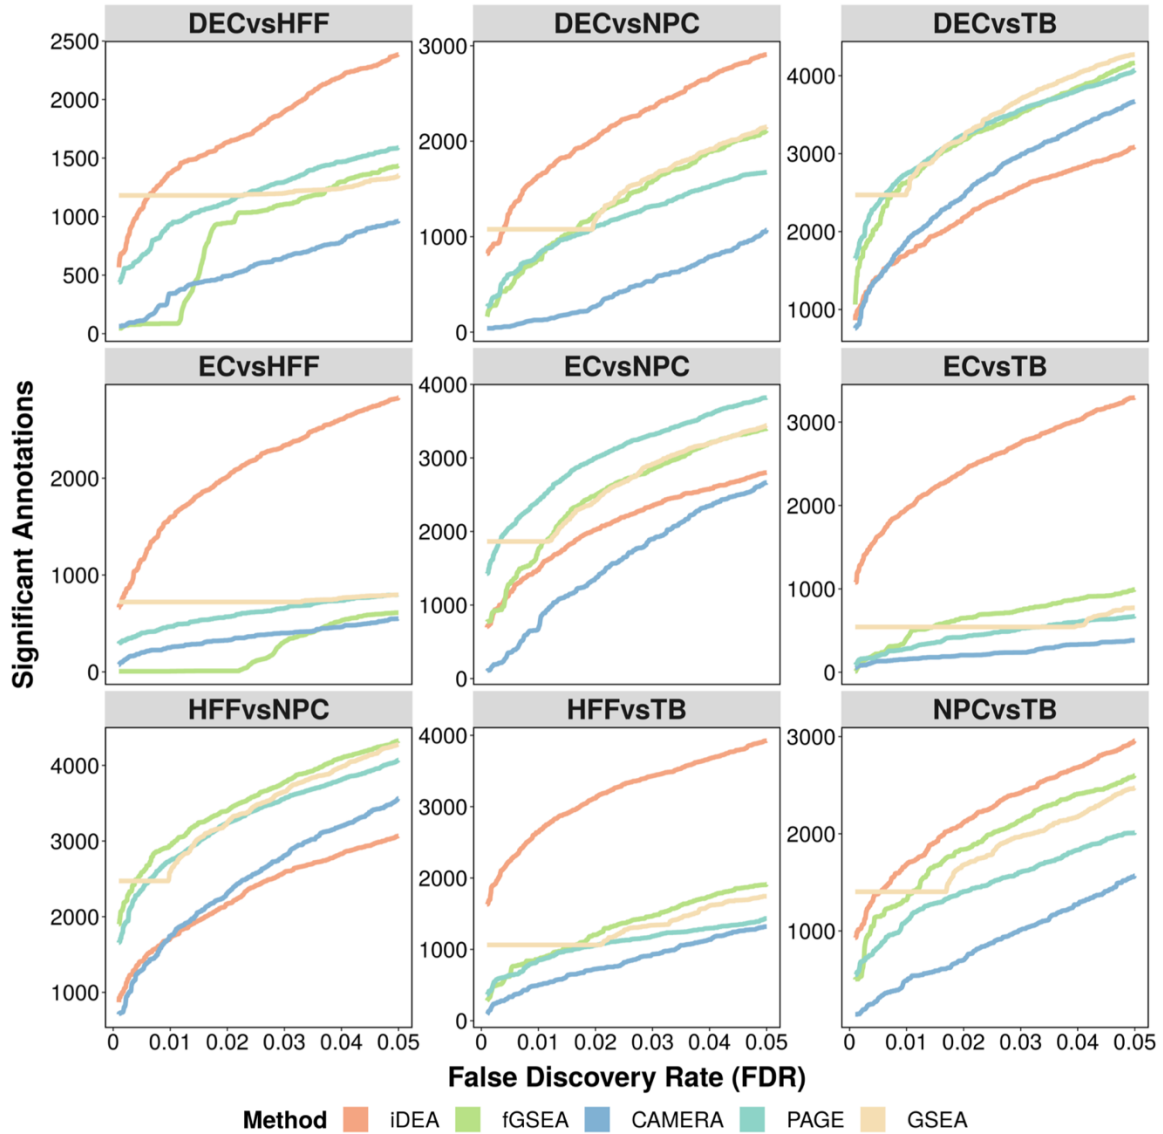

**Supplementary Figure 11. iDEA is more powerful than GSE methods for identifying enriched gene sets in pairwise cell-type comparison on human embryonic stem cell scRNA-seq dataset.** The power plots from iDEA (orange), fGSEA (green), CAMERA (navyblue), PAGE (skyblue) and GSEA (yellow) are shown under different cell type comparisons.

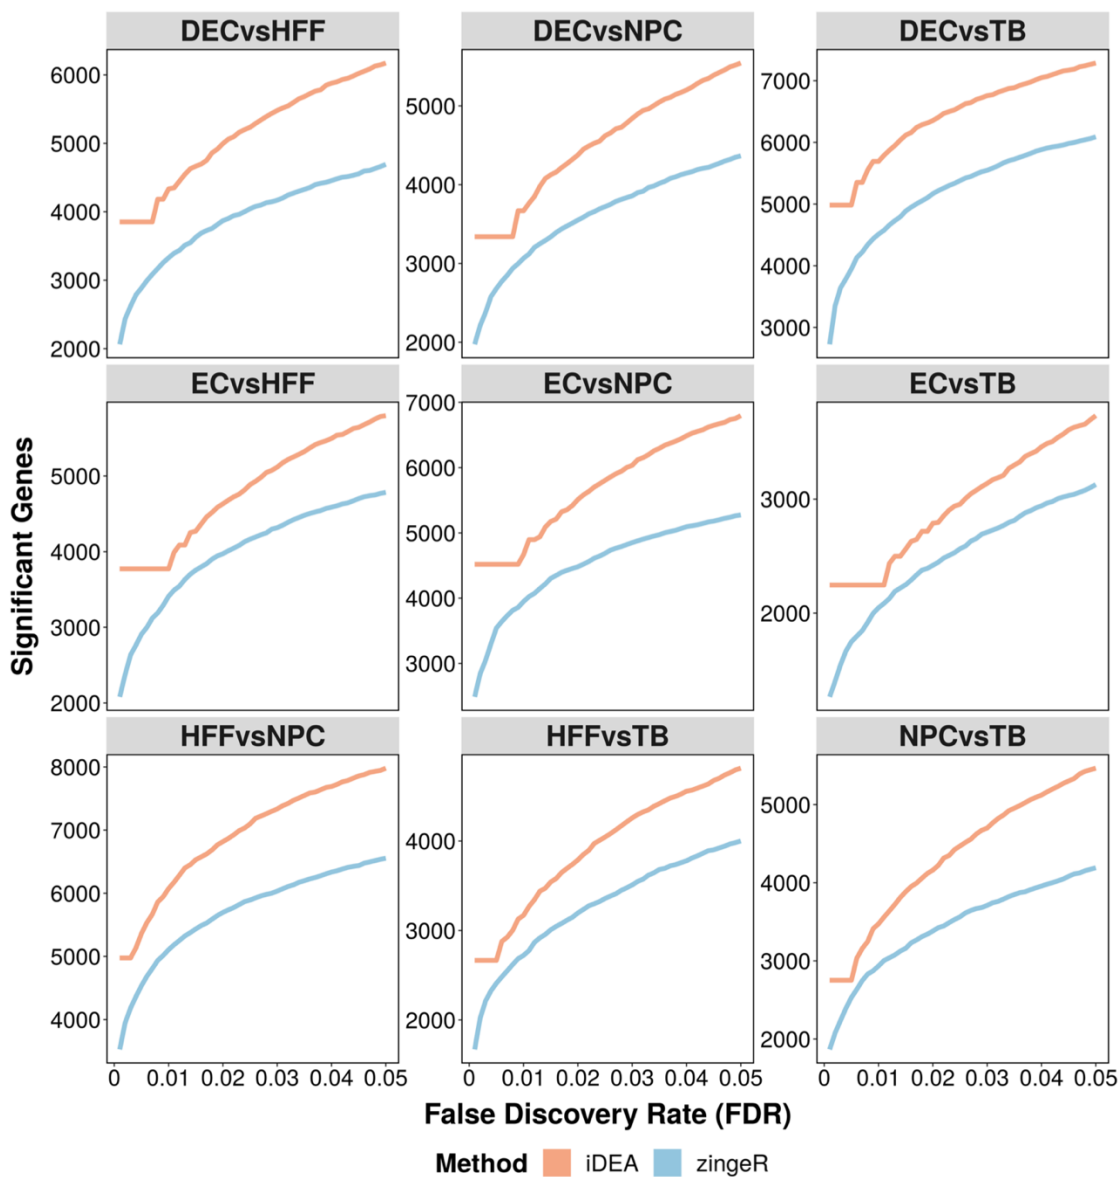

**Supplementary Figure 12.** iDEA provides the powerful performance on DE analysis when adding one biologically meaningful gene set in pairwise cell type comparison on human embryonic stem cell scRNA-seq dataset than zingeR. Number of identified DE genes by iDEA (orange) and zingeR (blue) are plotted against different empirical FDR values.

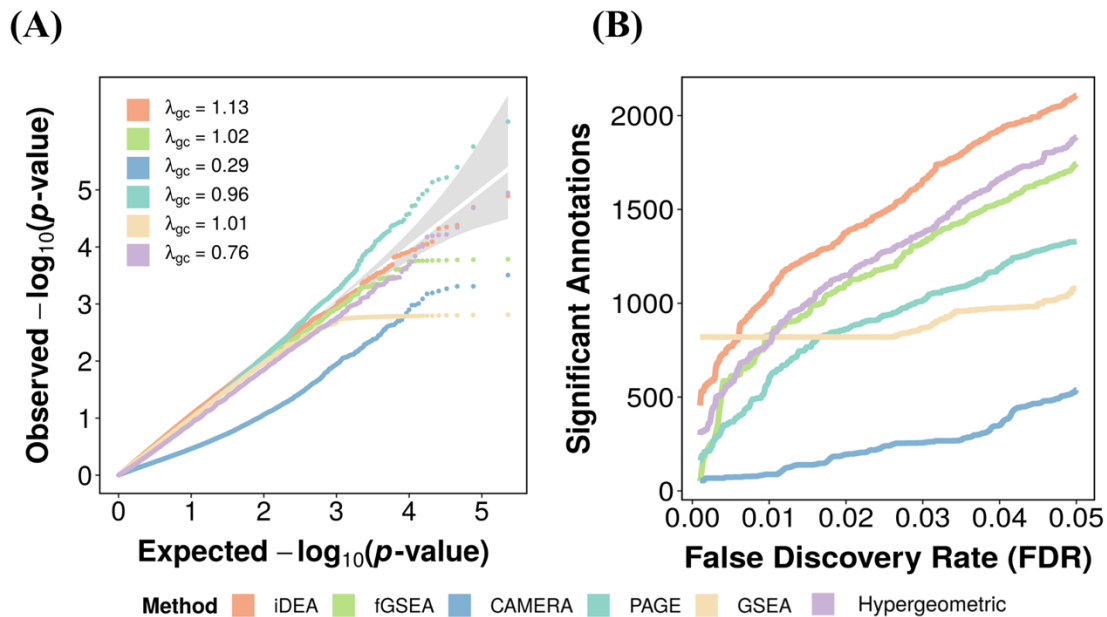

**Supplementary Figure 13. GSE Analysis including hypergeometric test results in human embryonic stem cell scRNA-seq dataset.** Results are shown for comparing definitive endoderm derivatives cell (DEC, 138 cells) and endothelial cell (EC, mesoderm derivatives, 105 cells). Quantile-quantile plots of  $-\log_{10}(p\text{-values})$  from GSE methods including iDEA (orange), fGSEA (green), CAMERA (navyblue), PAGE (skyblue), GSEA (yellow) and Hypergeometric test (purple) are shown under permuted null (**A**); Number of identified enriched gene sets by iDEA (orange), fGSEA (green), CAMERA (navyblue), PAGE (skyblue) GSEA (yellow) and Hypergeometric test (purple) are plotted against different empirical false discovery rates (FDR) (**B**). Here  $\lambda_{gc}$  is the genomic control factor.

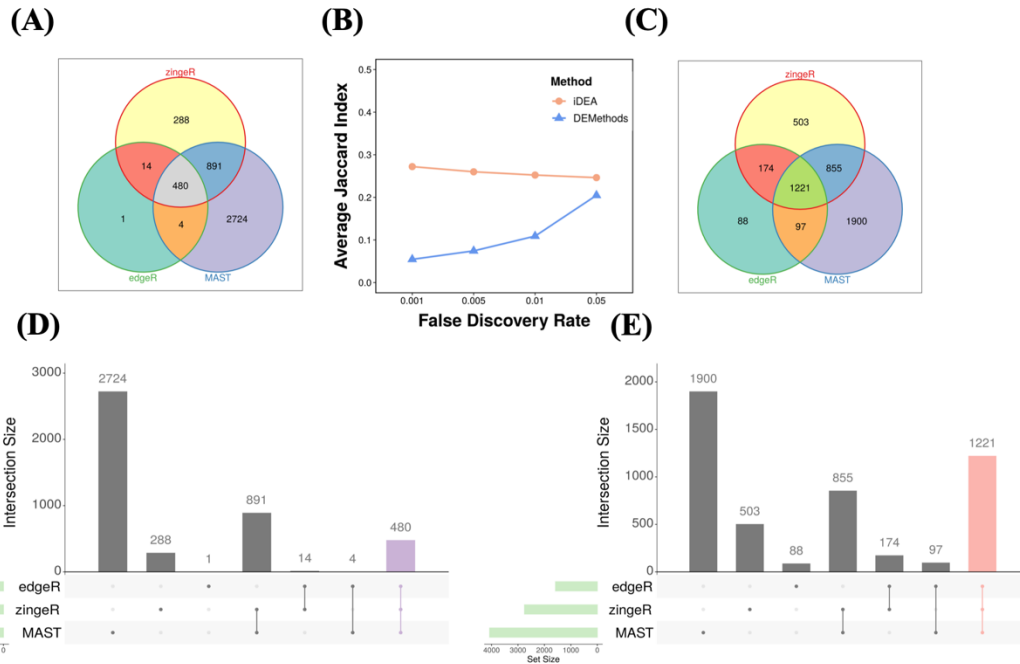

**Supplementary Figure 14. iDEA displays high consistency in detecting DE genes in human embryonic stem cell scRNA-seq data.** iDEA displays higher Jaccard index in the common DE genes. Jaccard index for top DE genes at an FDR of 1% between zingeR, MAST and edgeR, Jaccard index for top DE genes at an FDR of 1% between iDEA when using summary statistics from zingeR, MAST and edgeR, respectively. **(B)**; Overlap in top DE genes at an FDR of 1% between zingeR, MAST and edgeR **(A)**; Overlap in top DE genes at an FDR of 1% between iDEA when using summary statistics from zingeR, MAST and edgeR **(C)**; **(D)** and **(E)** are just another visualization of the overlap corresponding to **(A)** and **(C)** by UpSetR<sup>1</sup>.

**(A)**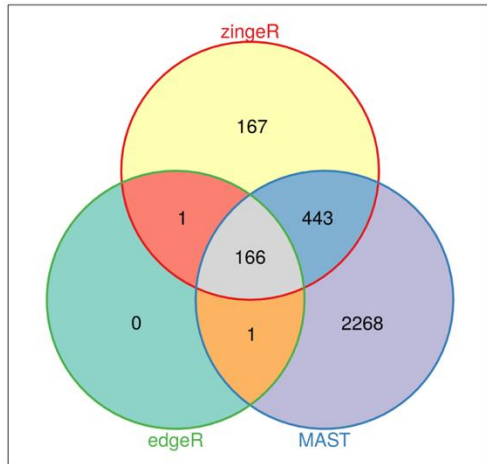**(B)**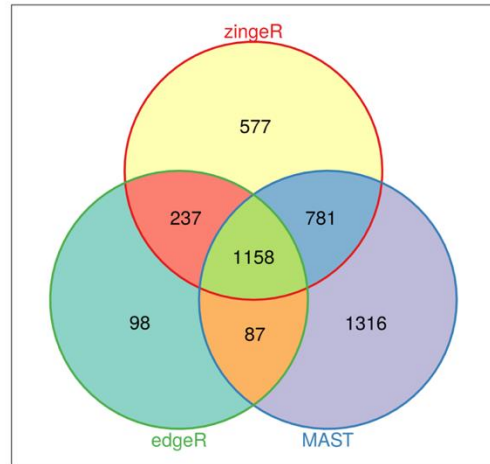**(C)**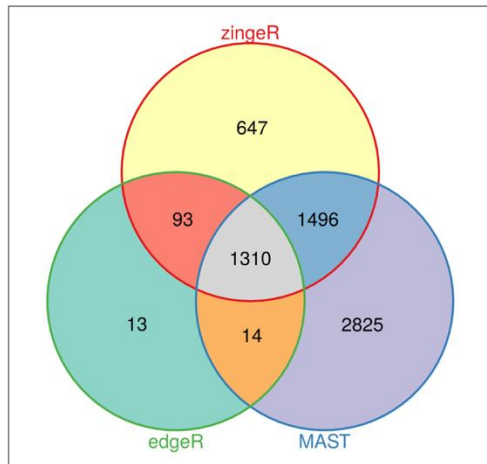**(D)**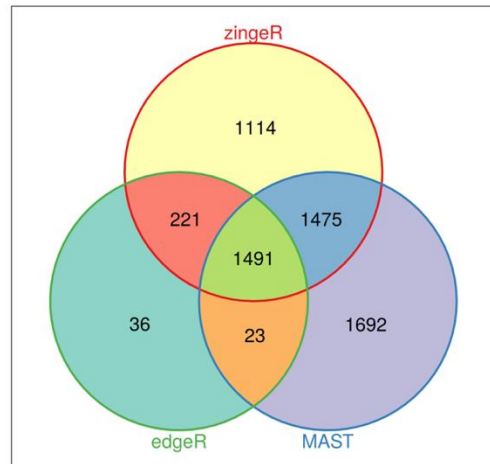

**Supplementary Figure 15. iDEA displays high consistency in detecting DE genes in human embryonic stem cell scRNA-seq data.** Overlap in top DE genes at an FDR of 0.1% between zingeR, MAST and edgeR **(A)**; Overlap in top DE genes at an FDR of 0.1% between iDEA when using summary statistics from zingeR, MAST and edgeR respectively **(B)**; Overlap in top DE genes at an FDR of 5% between zingeR, MAST and edgeR **(C)**; Overlap in top DE genes at an FDR of 5% between iDEA when using summary statistics from zingeR, MAST and edgeR, respectively **(D)**;



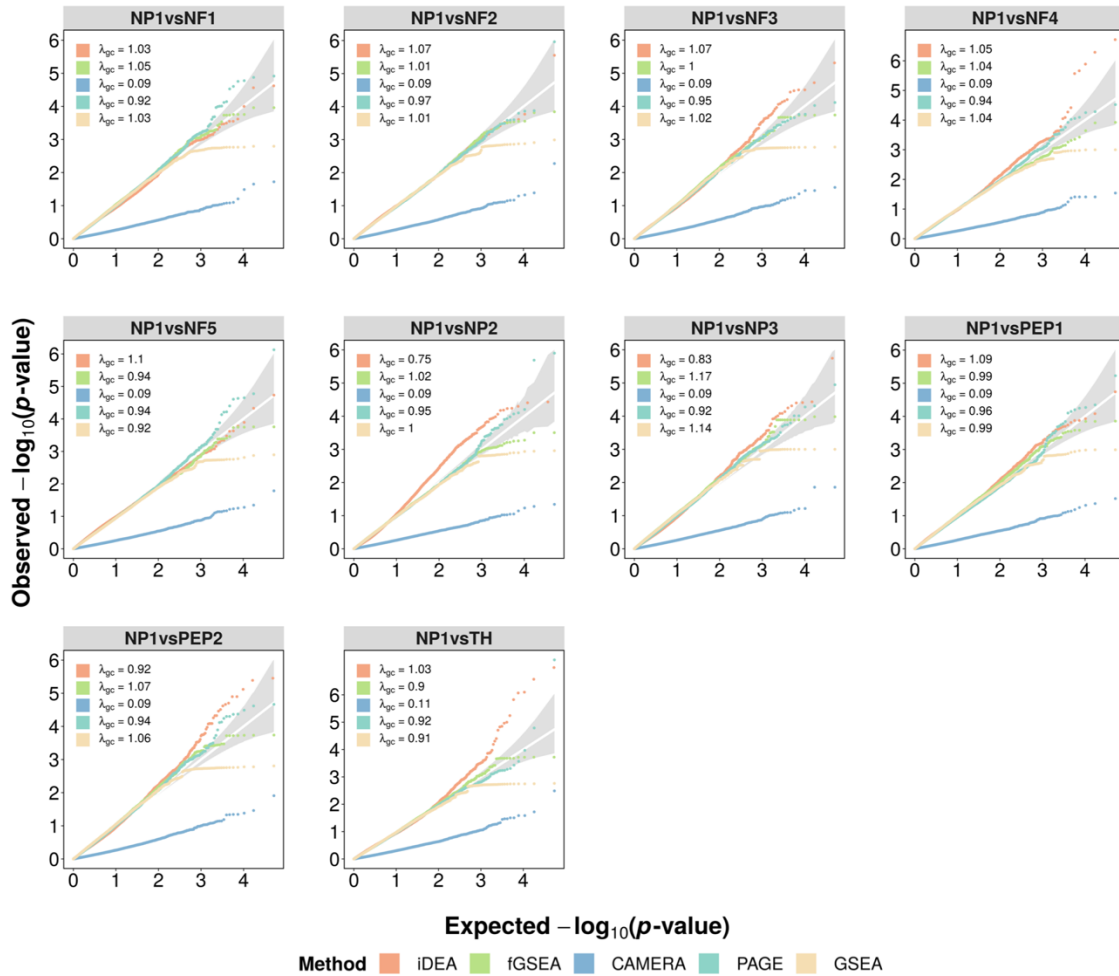

**Supplementary Figure 16. iDEA produces well-calibrated  $p$ -values in pairwise cell type comparison on mouse neuronal cell scRNA-seq datasets.** Quantile-quantile plots of  $-\log_{10}(p\text{-values})$  from iDEA (orange), fGSEA (green), CAMERA (navyblue), PAGE (skyblue) and GSEA (yellow) are shown under the null that permuted each gene set 10 times correspondingly.  $\lambda_{gc}$  is genomic control factor.

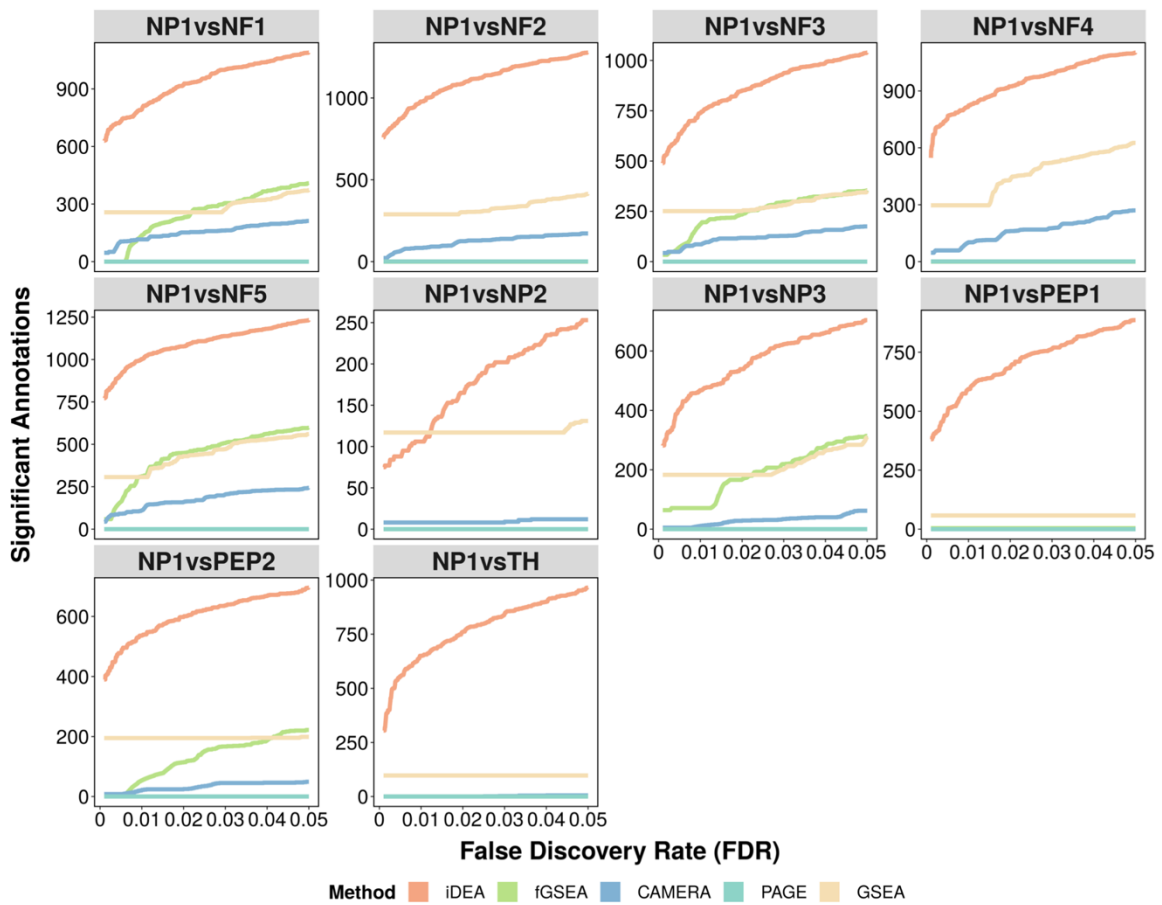

**Supplementary Figure 17. iDEA is more powerful than GSE methods for identifying enriched gene sets in pairwise cell-type comparison on mouse neuronal cell scRNA-seq dataset.** The power plots from iDEA (orange), fGSEA (green), CAMERA (navyblue), PAGE (skyblue) and GSEA (yellow) are shown under different cell type comparisons.

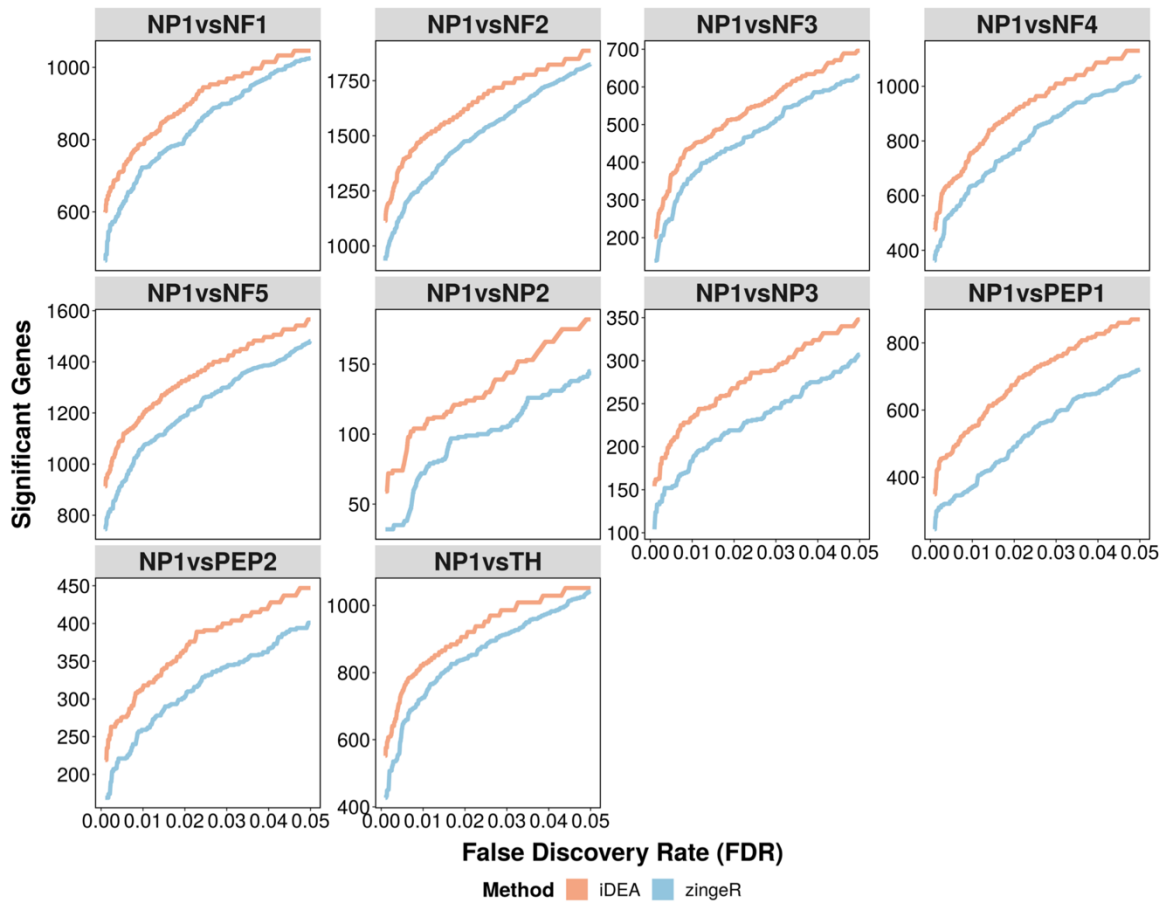

**Supplementary Figure 18. iDEA provides the powerful performance on DE analysis when adding one biologically meaningful gene set in pairwise cell type comparison on mouse neuronal cell scRNA-seq dataset than zingeR. Number of identified DE genes by iDEA (orange) and zingeR (blue) are plotted against different empirical FDR values.**

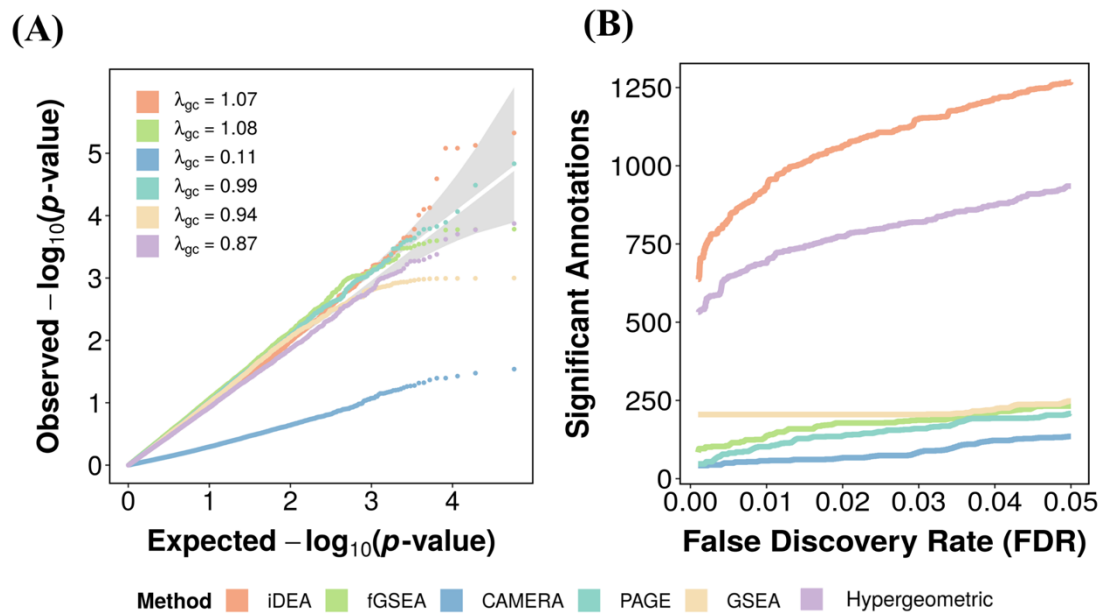

**Supplementary Figure 19. GSE Analysis including hypergeometric test results in mouse neuronal cell scRNA-seq dataset.** Results are shown for comparing nonpeptidergic nociceptors 1 (NP1) versus all the other cell types. Quantile-quantile plots of  $-\log_{10}(\text{p-values})$  from GSE methods including iDEA (orange), fGSEA (green), CAMERA (navyblue), PAGE (skyblue), GSEA (yellow) and Hypergeometric test (purple) are shown under permuted null **(A)**. Number of identified enriched gene sets by iDEA (orange), fGSEA (green), CAMERA (navyblue), PAGE (skyblue) GSEA (yellow) and Hypergeometric test (purple) are plotted against different empirical false discovery rates (FDR) **(B)**. Here  $\lambda_{gc}$  is the genomic control factor.

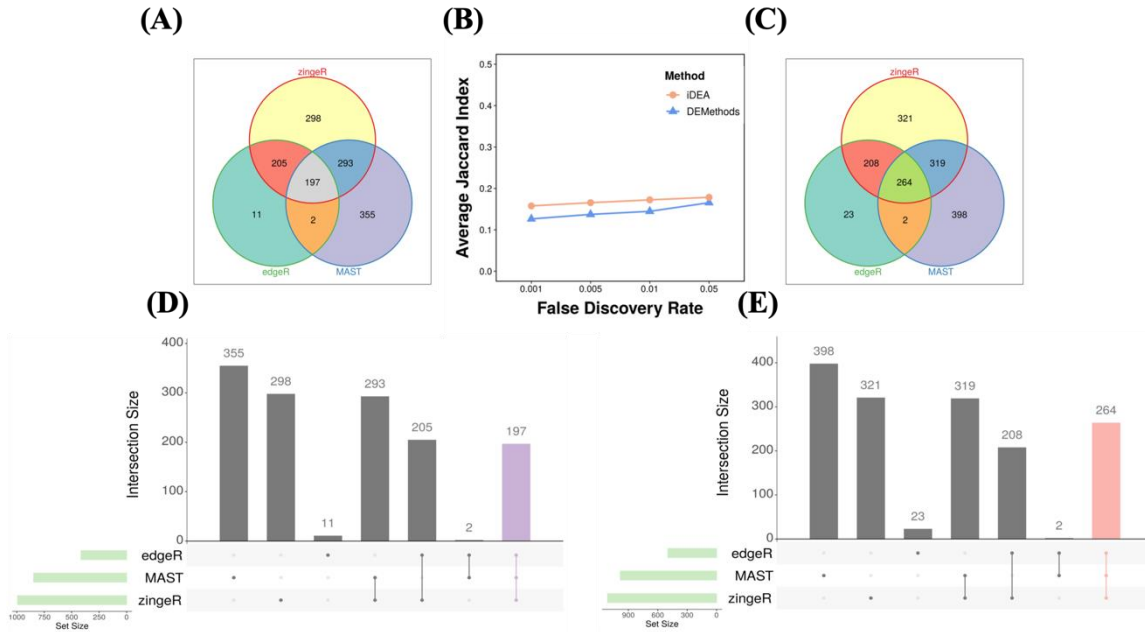

**Supplementary Figure 20. iDEA displays high consistency in detecting DE genes in mouse neuronal cell scRNA-seq data.** iDEA displays higher Jaccard index in the common DE genes. Jaccard index for top DE genes at an FDR of 1% between zingeR, MAST and edgeR, Jaccard index for top DE genes at an FDR of 1% between iDEA when using summary statistics from zingeR, MAST and edgeR respectively (red) **(B)**; Overlap in top DE genes at an FDR of 1% between zingeR, MAST and edgeR **(A)**; Overlap top DE genes at an FDR of 1% between iDEA when using summary statistics from zingeR, MAST and edgeR **(C)**; **(D)** and **(E)** are just another visualization of the overlap corresponding to **(A)** and **(C)** by UpSetR<sup>1</sup>.

**(A)**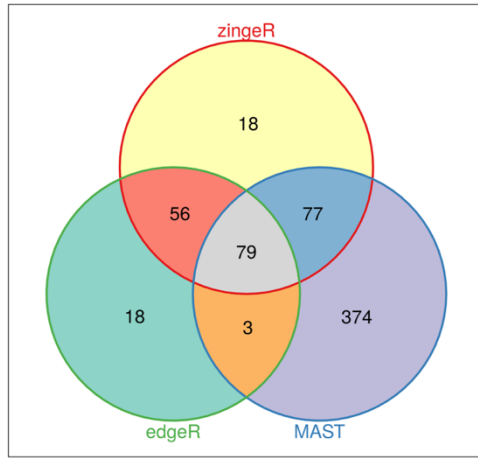**(B)**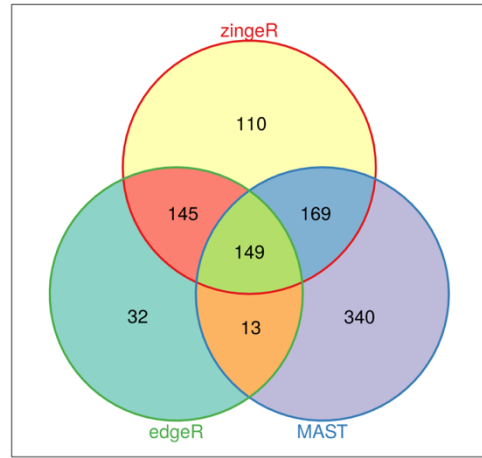**(C)**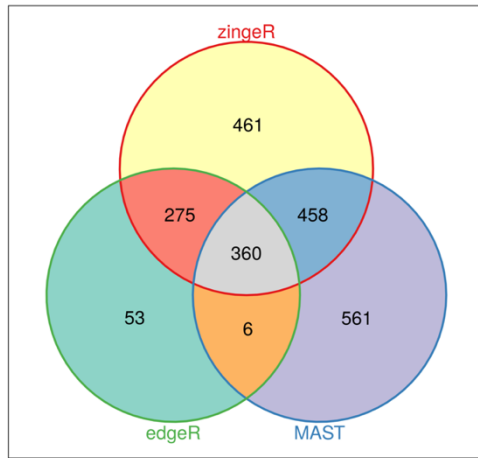**(D)**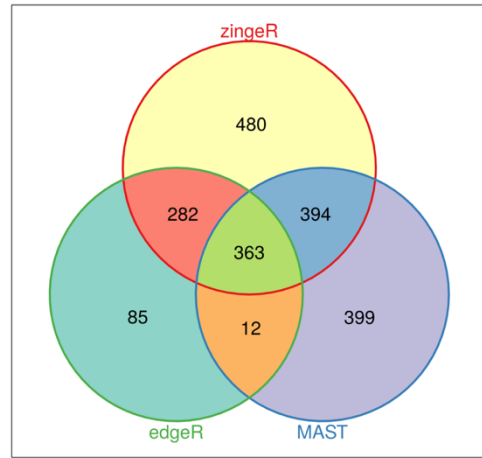

**Supplementary Figure 21. iDEA displays high consistency in detecting DE genes in mouse neuronal cell scRNA-seq data.** Overlap in top DE genes at an FDR of 0.1% between zingeR, MAST and edgeR **(A)**; Overlap in top DE genes at an FDR of 0.1% between iDEA when using summary statistics from zingeR, MAST and edgeR respectively **(B)**; Overlap in top DE genes at an FDR of 5% between zingeR, MAST and edgeR **(C)**; Overlap in top DE genes at an FDR of 5% between iDEA when using summary statistics from zingeR, MAST and edgeR respectively **(D)**;

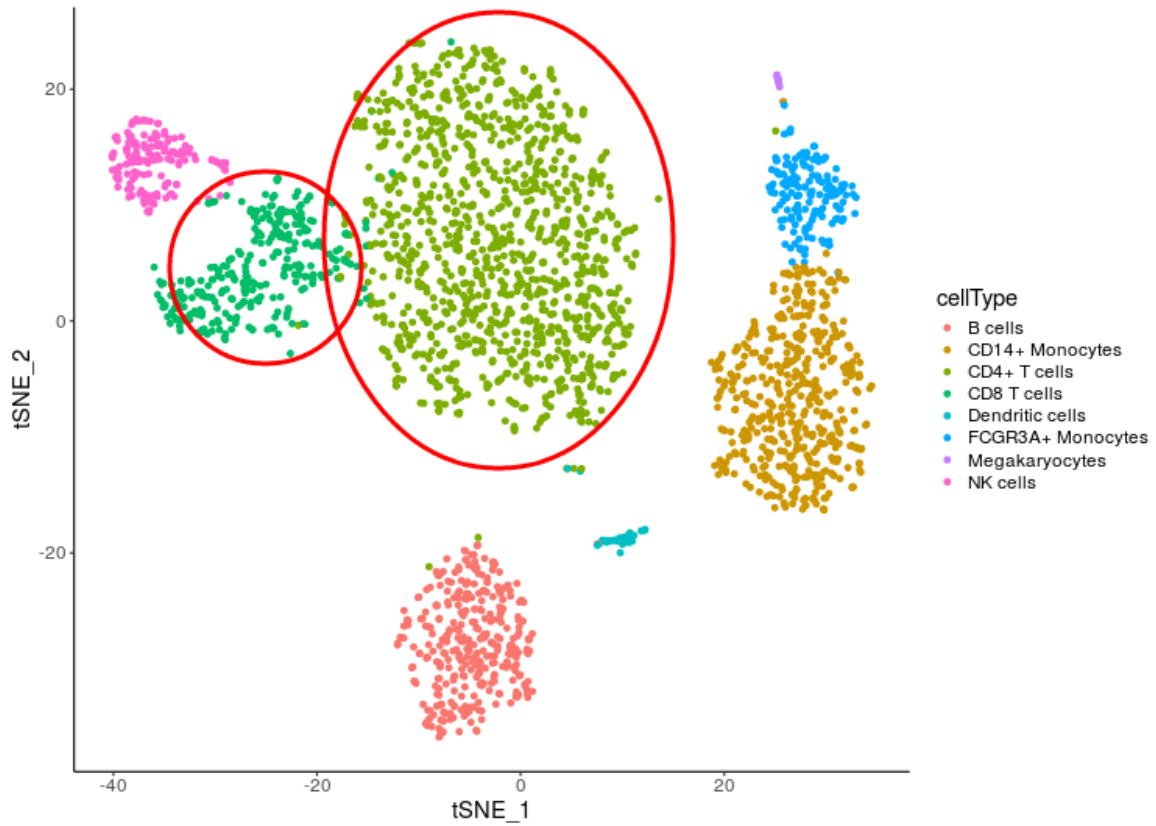

**Supplementary Figure 22.** The scatterplot of first two t-SNE principal components for 10x Genomics data set. There are total 8 cell types. CD4+ T cell type and CD8+ T cell type are highlighted in red circles. The cells are colored by Seurat clustering method.

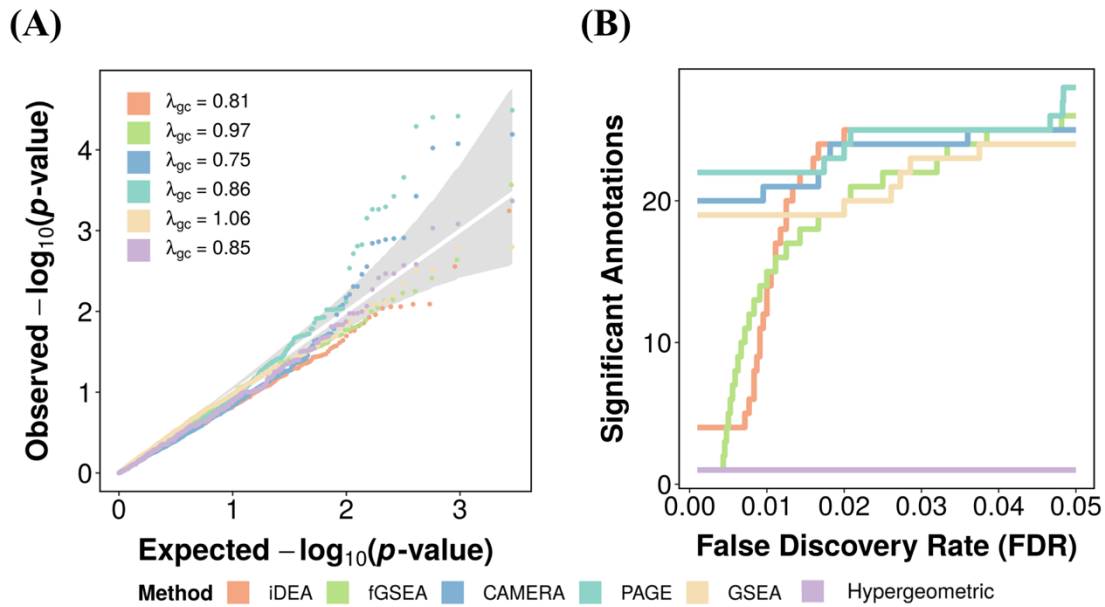

**Supplementary Figure 23. GSE Analysis including hypergeometric test results in 10x Genomics data set.** Results are shown for comparing CD4+ T cells versus CD8+ T cells. Quantile-quantile plots of  $-\log_{10}(p\text{-values})$  from GSE methods including iDEA (orange), fGSEA (green), CAMERA (navyblue), PAGE (skyblue), GSEA (yellow) and Hypergeometric test (purple) are shown under permuted null **(A)**. Number of identified enriched gene sets by iDEA (orange), fGSEA (green), CAMERA (navyblue), PAGE (skyblue) GSEA (yellow) and Hypergeometric test (purple) are plotted against different empirical false discovery rates (FDR) **(B)**. Here  $\lambda_{gc}$  is the genomic control factor.



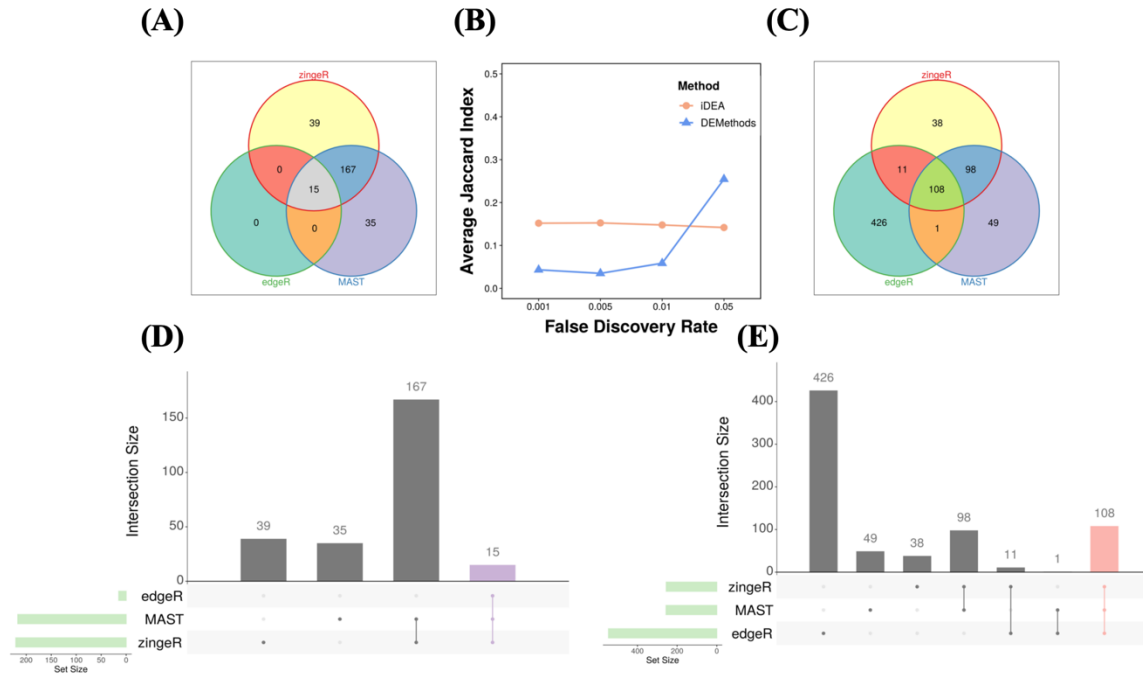

**Supplementary Figure 24. iDEA displays high consistency in detecting DE genes in 10x Genomics scRNA-seq data.** iDEA displays higher Jaccard index in the common DE genes. Jaccard index for top DE genes at an FDR of 1% between zingeR, MAST and edgeR, Jaccard index for top DE genes at an FDR of 1% between iDEA when using summary statistics from zingeR, MAST and edgeR respectively (red) **(B)**; Overlap in top DE genes at an FDR of 1% between zingeR, MAST and edgeR **(A)**; Overlap top DE genes at an FDR of 1% between iDEA when using summary statistics from zingeR, MAST and edgeR **(C)**; **(D)** and **(E)** are just another visualization of the overlap corresponding to **(A)** and **(C)** by UpSetR<sup>1</sup>.

**(A)**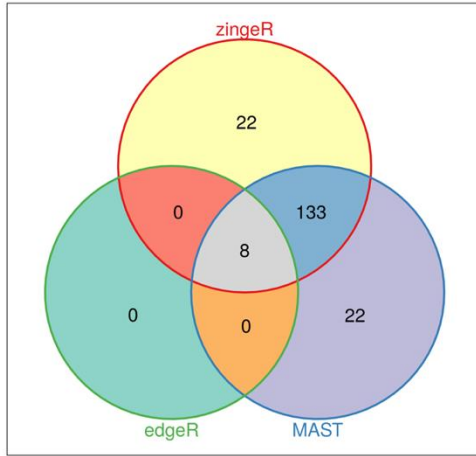**(B)**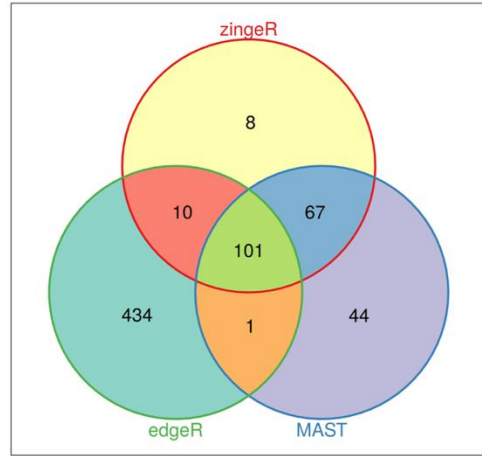**(C)**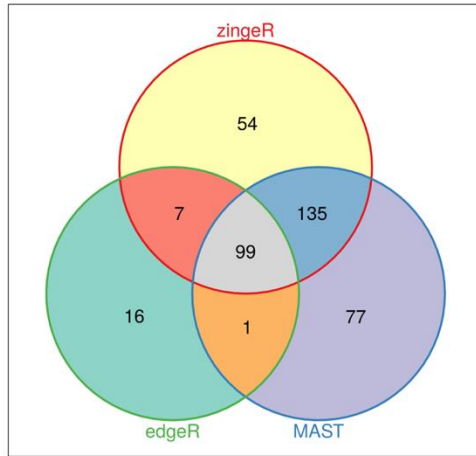**(D)**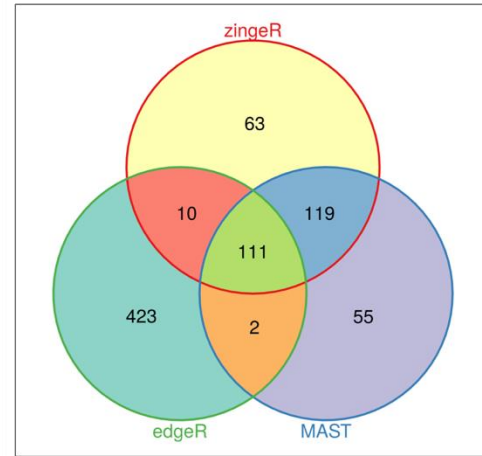

**Supplementary Figure 25. iDEA displays high consistency in detecting DE genes in 10x Genomics scRNA-seq data.** Overlap in top DE genes at an FDR of 0.1% between zingeR, MAST and edgeR **(A)**; Overlap in top DE genes at an FDR of 0.1% between iDEA when using summary statistics from zingeR, MAST and edgeR respectively **(B)**; Overlap in top DE genes at an FDR of 5% between zingeR, MAST and edgeR **(C)**; Overlap in top DE genes at an FDR of 5% between iDEA when using summary statistics from zingeR, MAST and edgeR respectively **(D)**;

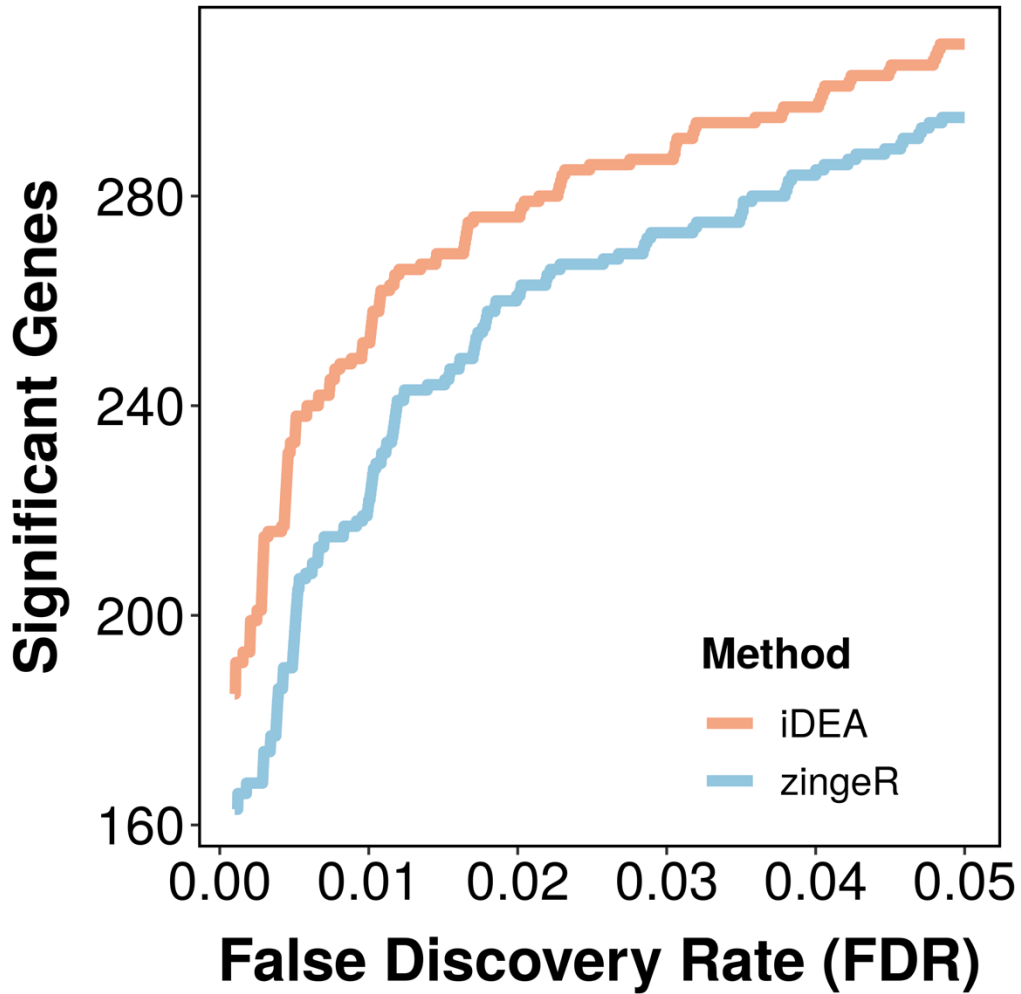

**Supplementary Figure 26. DE analysis results in the 10X Genomics scRNA-seq data when no interested gene set information provided.** Results are shown for comparing CD4+ T cells versus CD8+ T cells. Number of identified DE genes by iDEA (orange) and zingeR (blue) are plotted against different empirical FDR values. iDEA is more powerful than zingeR for DE analysis when there is no interested gene set information provided.

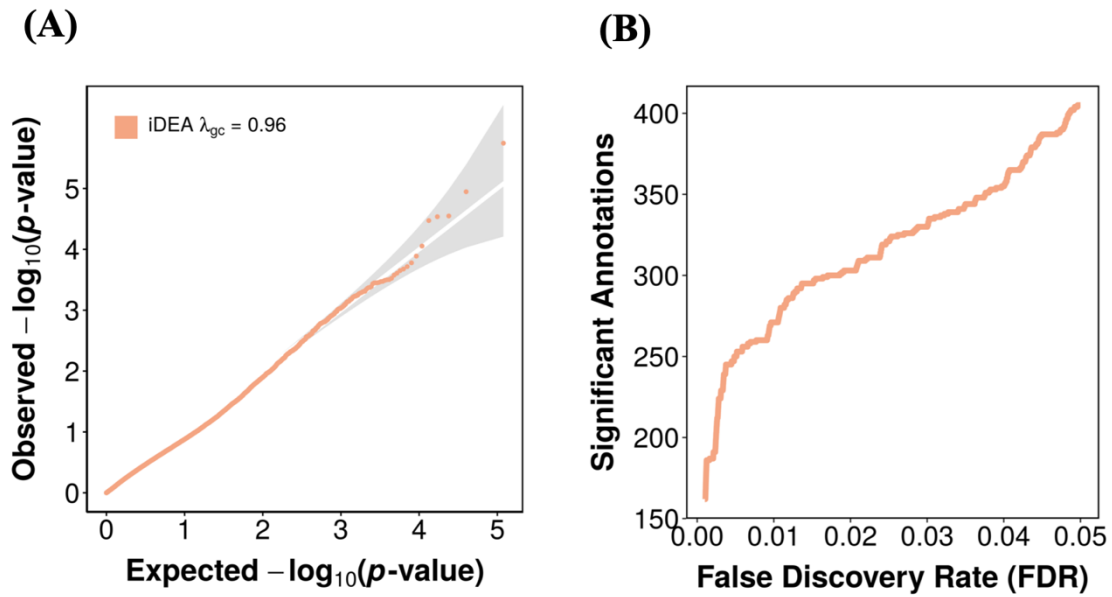

**Supplementary Figure 27. iDEA analysis results in the 10X Genomics scRNA-seq data by using larger human gene sets.** Results are shown for comparing CD4+ T cells versus CD8+ T cells. Quantile-quantile plots of  $-\log_{10}(p\text{-values})$  from GSE methods including iDEA (orange) **(A)**; Number of identified enriched gene sets by iDEA (orange) at a wide range of FDR **(B)**; Here  $\lambda_{gc}$  is the genomic control factor.

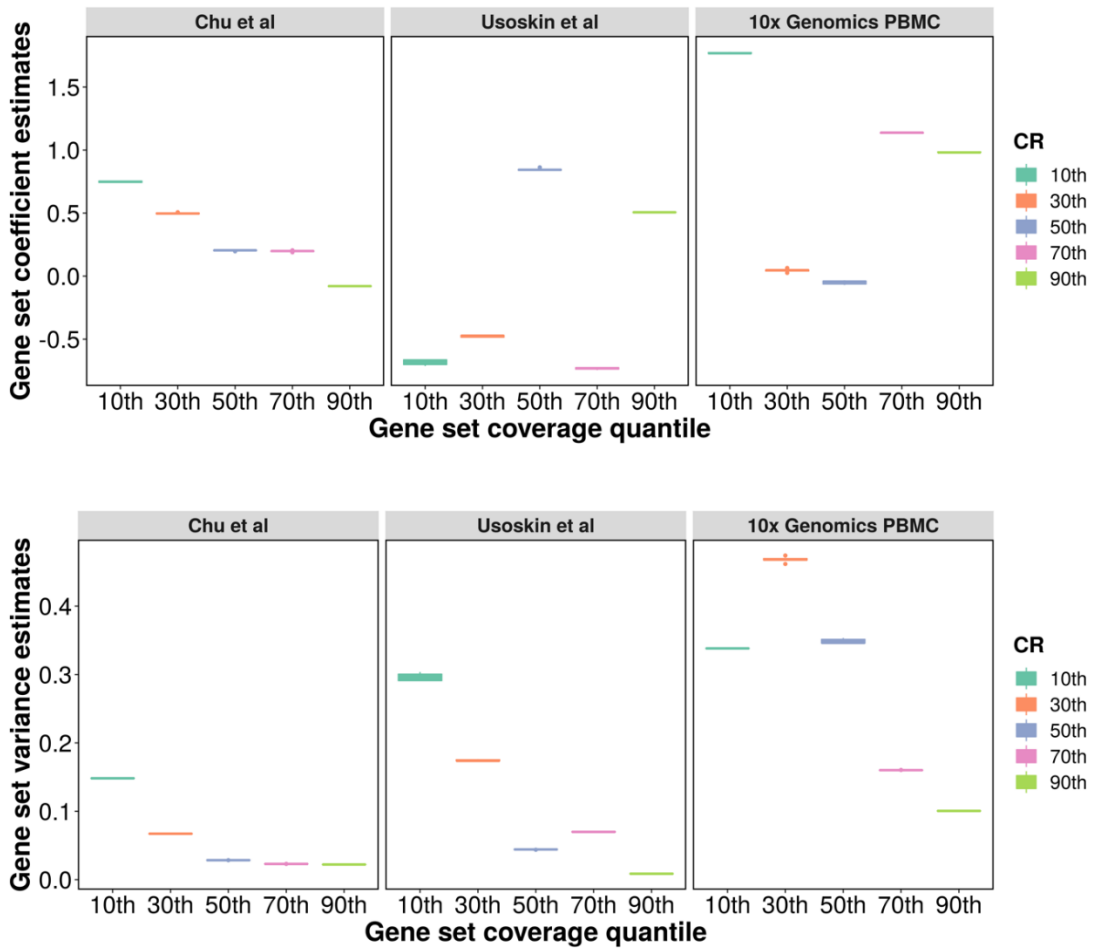

**Supplementary Figure 28. Sensitivity analysis of hyperparameters in prior distribution of  $\sigma_{\beta}^2$ .** Boxplot of the estimates of gene set coefficient and variance of gene set coefficient are displayed for three scRNA-seq dataset: human embryonic stem cell (Chu et al), mouse neuronal cell (Usoskin et al) and 10x Genomics PBMC scRNA-seq dataset. For each dataset, we tested the parameter estimates on gene sets with different coverage rate percentile among all gene sets we analyzed in that corresponding dataset. For each gene set with different coverage rate, estimates of gene set coefficient and variance were obtained under different prior distribution of  $\sigma_{\beta}^2$ . Parameter estimates are stable for gene sets across a wide range of prior distribution of  $\sigma_{\beta}^2$ . For each box plot, the bottom and the top of the box are the 25th and 75th quantiles, while the whiskers represent 1.5 \* interquartile range from the lower and upper bounds of the box.

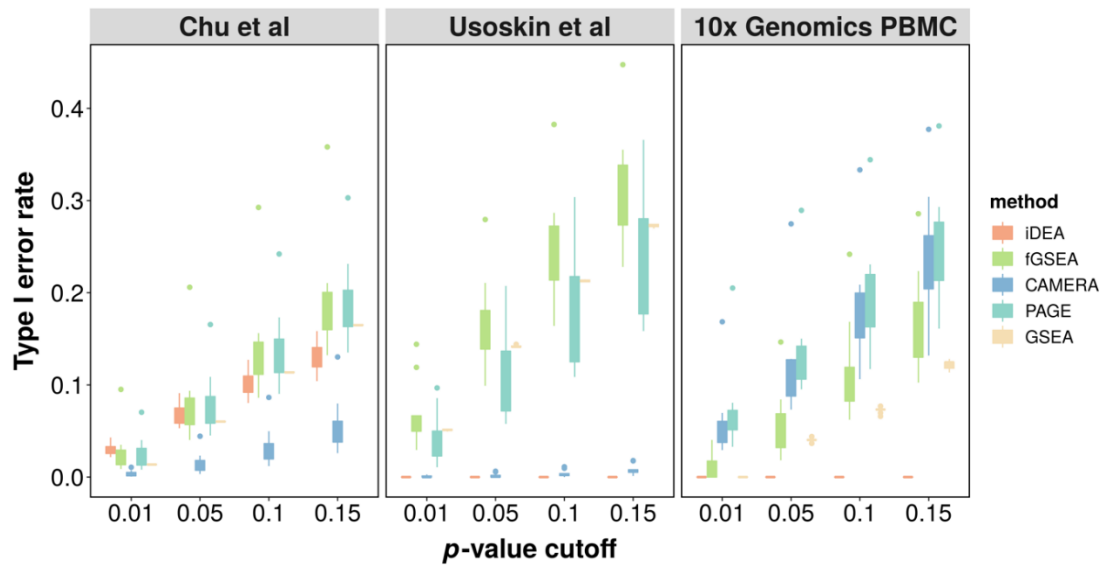

**Supplementary Figure 29. Type I error rate in real datasets.** We split the dataset within the same cell type ( $n = 10$  replicates) to construct the true null distribution. Box plot of Type I error rate of iDEA (orange), fGSEA (green), CAMERA (navyblue), PAGE (skyblue) and GSEA (yellow) are shown in human embryonic stem cell scRNA-seq dataset (Chu et al), mouse neuronal cell scRNA-seq dataset (Usoskin et al) and 10x Genomics PBMC scRNA-seq dataset. iDEA controlled type I error well in all three data sets. For each box plot, the bottom and the top of the box are the 25th and 75th quantiles, while the whiskers represent  $1.5 \times$  interquartile range from the lower and upper bounds of the box.

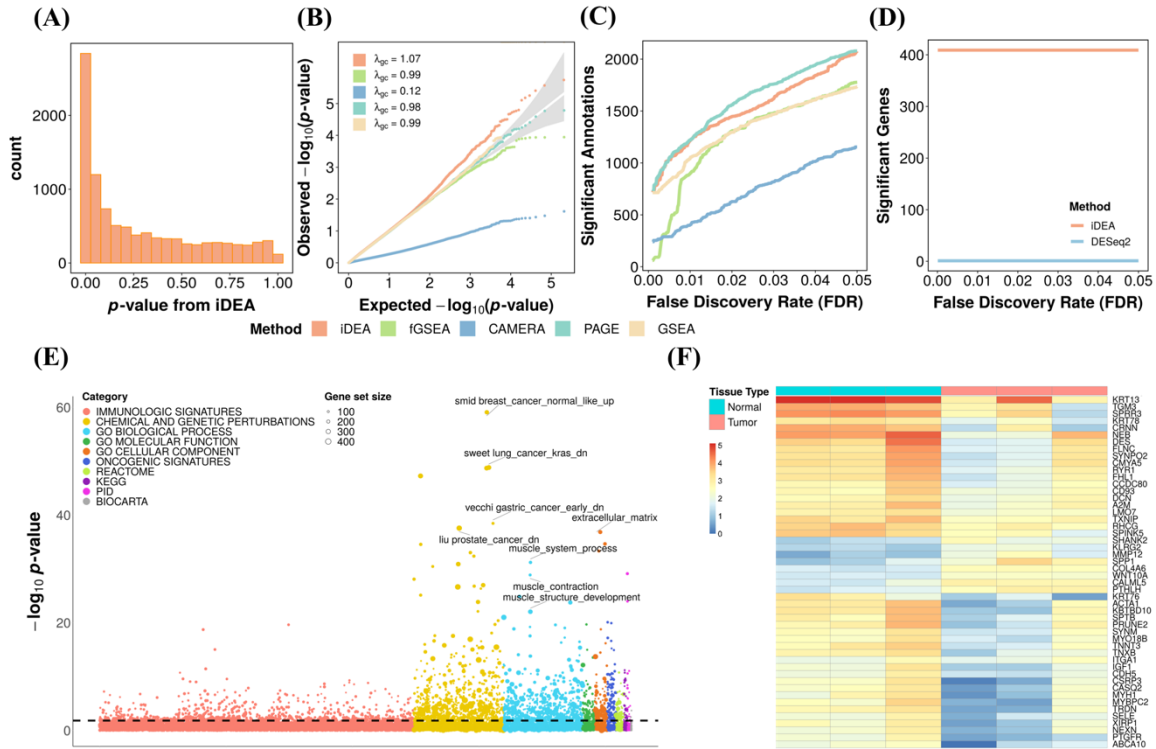

**Supplementary Figure 30. Analysis results in the bulk RNAseq data.** Results are shown for comparing matched normal oral tissue versus oral squamous cell carcinoma. (A)  $p$ -values from iDEA for GSE analysis display expected enrichment of small  $p$ -values (for true signals) and a long flat tail towards large  $p$ -values. (B) Quantile-quantile plots of  $-\log_{10}(p\text{-values})$  from GSE methods including iDEA (orange), fGSEA (green), CAMERA (navyblue), PAGE (skyblue) and GSEA (yellow) are shown under permuted null. The  $p$ -values from iDEA, fGSEA, PAGE and GSEA are reasonably well calibrated. The  $p$ -values from CAMERA are overly conservative. Here  $\lambda_{gc}$  is the genomic control factor. (C) Number of identified enriched gene sets by iDEA (orange), fGSEA (green), CAMERA (navyblue), PAGE (skyblue) and GSEA (yellow) are plotted against different empirical false discovery rates (FDR). iDEA is as the same powerful as PAGE than other methods for GSE analysis. (D) Number of identified DE genes by iDEA (orange) and DESeq2 (blue) are plotted against different empirical FDR values. iDEA is more powerful than DESeq for DE analysis. (E) Heatmap shows the normalized expression level (log10-transformation with pseudo-count 0.1) for selected 50 DE genes (rows) identified by iDEA for cells in the two tissue types (columns). Genes are sorted by Hierarchical clustering; cells are ordered by tissue types (Normal: blue; Tumor: red). These DE genes clearly distinguish two compared tissues. (F) Bubble plot shows  $-\log_{10} p\text{-values}$  for GSE analysis from iDEA (y-axis) for different gene sets. Gene sets are colored by ten categories: immunologic signatures (red), chemical and genetic perturbations (yellow), GO biological process (blue), GO molecular function (green), GO cellular component (orange), oncogenic signatures (deep blue), Reactome (grass-green), KEGG (purple), PID (rose), and Biocarta (grey). The size of the dot represents the number of genes contained in the gene set. Names for ten of the gene sets that are closely related to oral squamous cell carcinoma are highlighted in the panel.

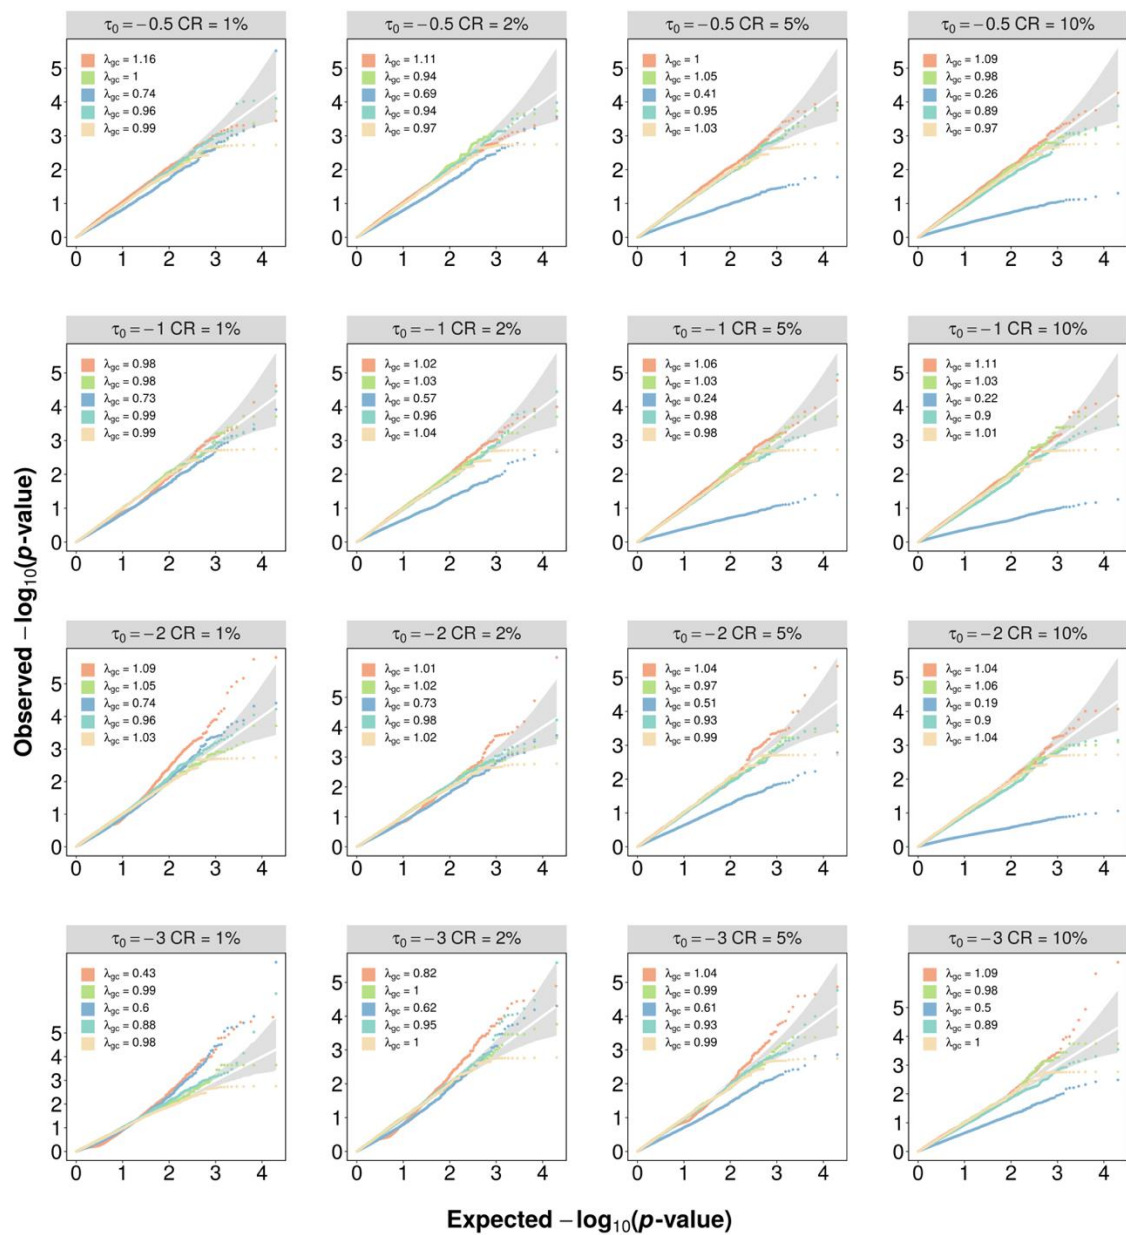

**Supplementary Figure 31. iDEA produces well-calibrated  $p$ -values for gene set enrichment analysis under null simulations in iDEA variant when modeling beta effect size directly.** Quantile-quantile plots of  $-\log_{10}(\text{p-values})$  from iDEA (orange), fGSEA (green), CAMERA (navyblue), PAGE (skyblue) and GSEA (yellow) are shown under different null scenarios with varying number of DE genes (denoted by the odd parameter  $\tau_0$ ;  $-0.5, -1.0, -2.0$ , or  $-3.0$ ) and gene set coverage rates (CR; 1%, 2%, 5% or 10%). CR represents the percentage of genes inside the gene set.  $\lambda_{gc}$  is genomic control factor.



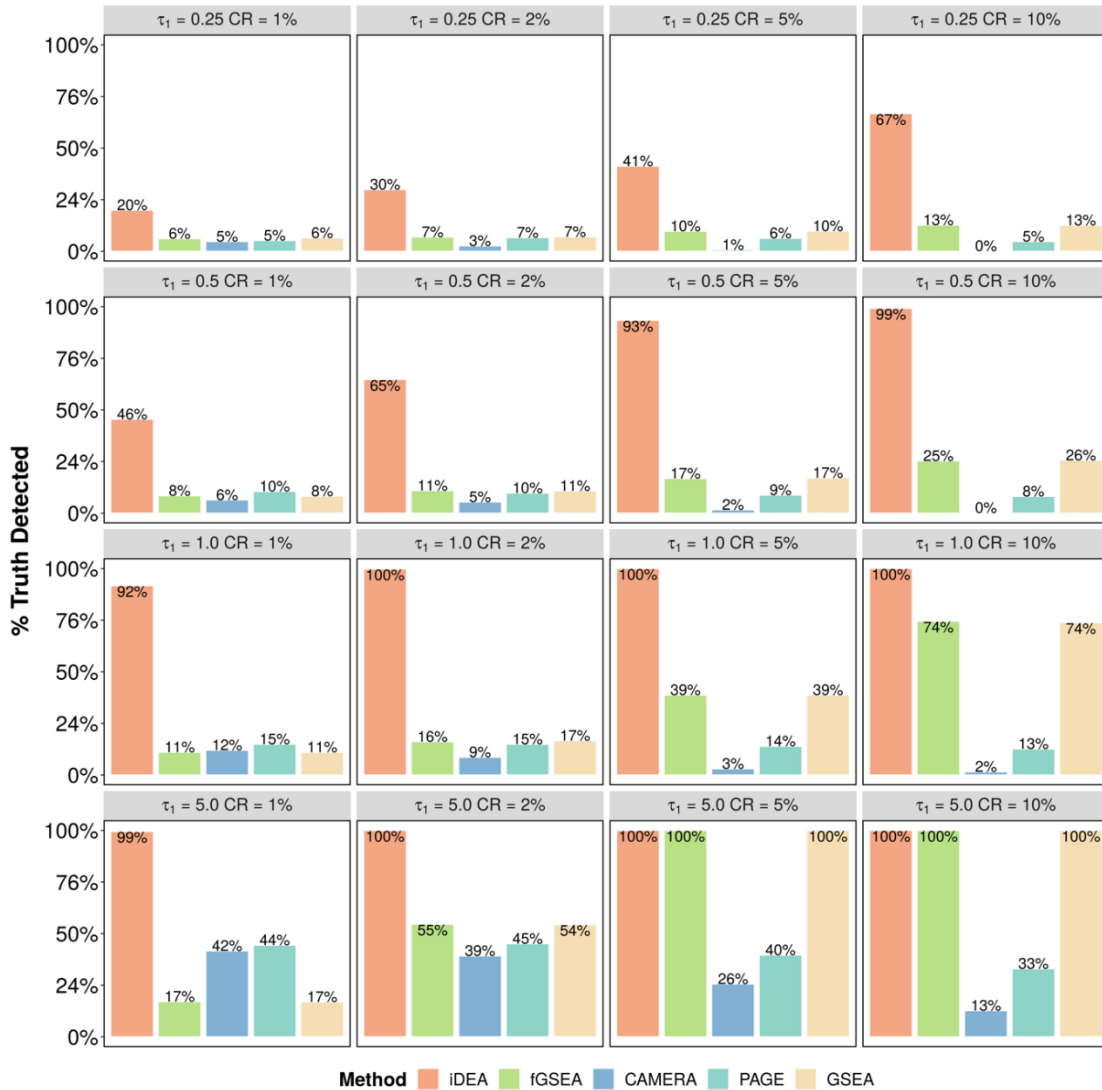

**Supplementary Figure 32. iDEA is more powerful than GSE methods for identifying enriched gene sets under alternative simulations in iDEA variant when modeling beta effect size directly.** The power plots from iDEA (orange), fGSEA (green), CAMERA (navyblue), PAGE (skyblue) and GSEA (yellow) are shown under different scenarios with varying gene set enrichment coefficient (denoted by the odd parameter  $\tau_1$ ; 0.25, 0.5, 1.0 or 5.0) and gene set coverage rates (CR; 1%, 2%, 5% or 10%). CR represents the percentage of genes inside the gene set. Here, power was calculated based on an FDR of 5%.

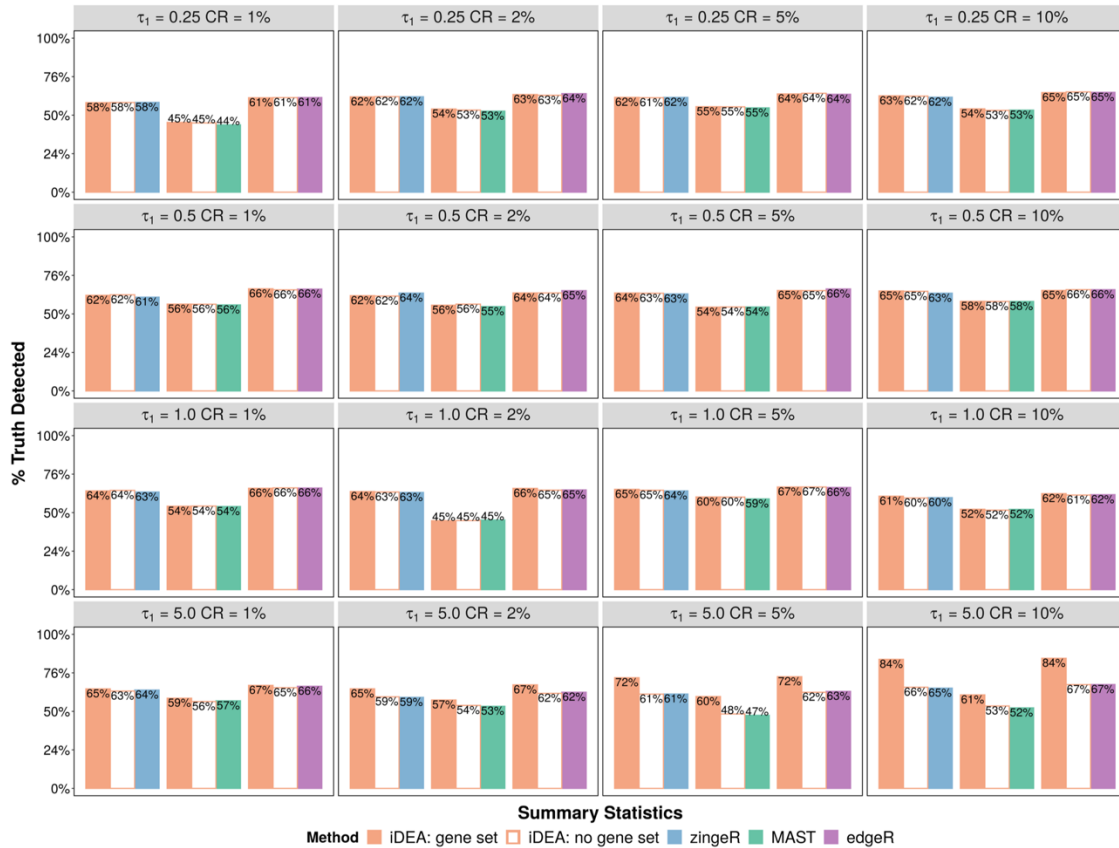

**Supplementary Figure 33. iDEA is more powerful than DE methods for identifying DE genes under alternative simulations in iDEA variant when gene set enrichment parameter is larger.** Simulations were performed on one fixed scRNA-seq data set with  $\tau_0 = -2$ , varying  $\tau_1$  and CR.  $\tau_1$  is set to be 0.25, 0.5, 1.0 or 5.0 and CR is set to be 1%, 2%, 5%, 10% respectively. In each simulation setting, power of DE results between common DE method (zingeR (blue), MAST (green), edgeR (purple)) and iDEA (orange) with summary statistics obtained from that corresponding DE method when adding simulated gene set (filling color) or not (not filling color) is plotted. The power was calculated as the percentage of truly DE genes detected in each method. Here, power was calculated based on an FDR of 5%.

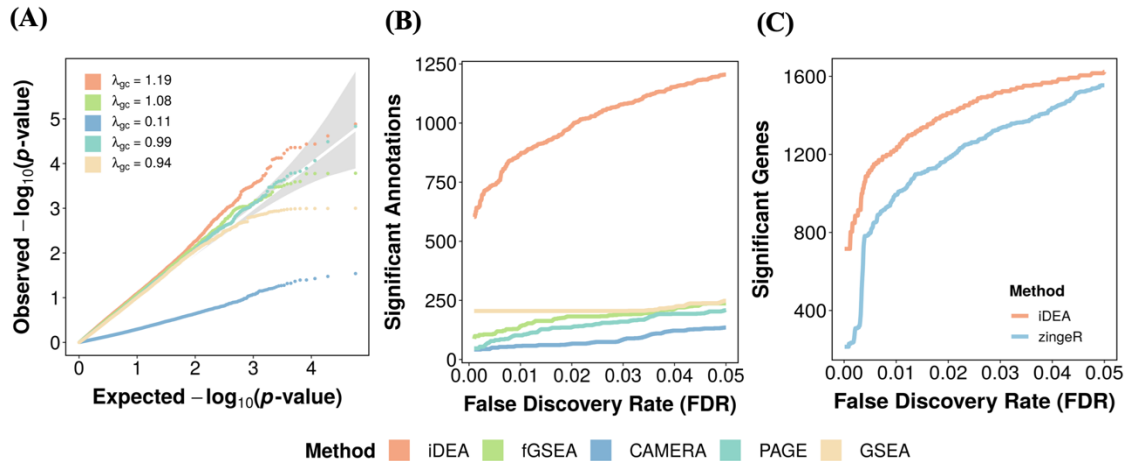

**Supplementary Figure 34. Analysis results of iDEA variant when modeling on beta effect size directly in the mouse neuronal cell scRNA-seq data.** Results are shown for comparing nonpeptidergic nociceptors 1 (NP1) versus all the other cell types. **(A)** Quantile-quantile plots of  $-\log_{10}(p\text{-value})$  from GSE methods including iDEA (orange), fGSEA (green), CAMERA (navyblue), PAGE (skyblue) and GSEA (yellow) are shown under permuted null. The  $p$ -values from iDEA and fGSEA are reasonably well calibrated. The  $p$ -values from CAMERA are overly conservative. Here  $\lambda_{gc}$  is the genomic control factor. **(B)** Number of identified enriched gene sets by iDEA (orange), fGSEA (green), CAMERA (navyblue), PAGE (skyblue) and GSEA (yellow) are plotted against different empirical false discovery rates (FDR). iDEA is more powerful than other methods for GSE analysis. **(C)** Number of identified DE genes by iDEA (orange) and zingeR (blue) are plotted against different empirical FDR values. iDEA is more powerful than zingeR for DE analysis.

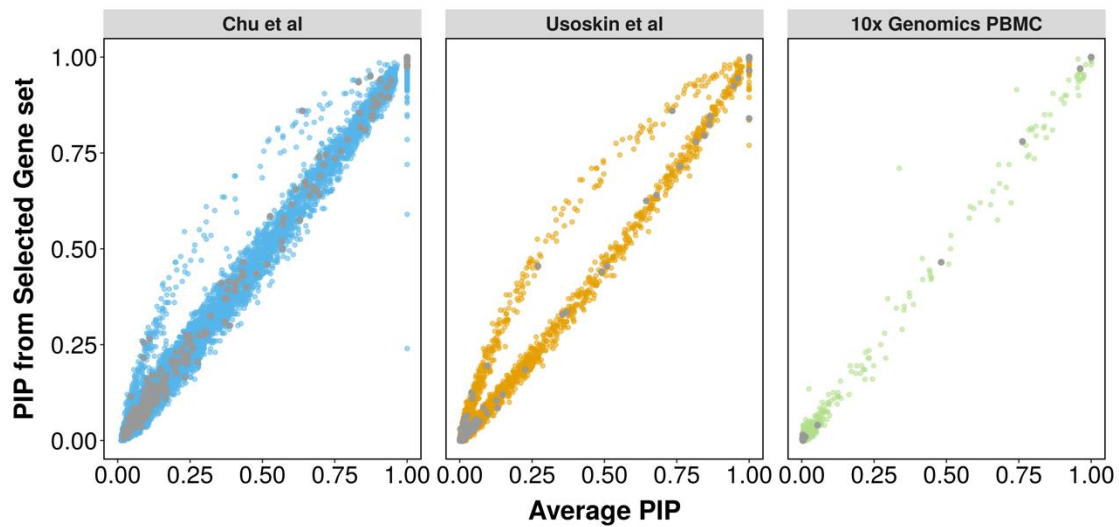

**Supplementary Figure 35. Posterior inclusion probabilities (PIPs) calculated by iDEA when adding specific gene set is highly correlated with averaging PIPs across all gene sets in all three scRNA-seq datasets.** Here, each dot represents each gene with x-axis represents the averaged pip and y-axis represents gene set specific pip. Genes in that selected gene set are highlighted by grey color. In Human embryonic stem cell scRNA-seq dataset (Chu et al), we added the gene set GO:0001944 (vasculature development). In Mouse Sensory neuron scRNA-seq dataset, we added the gene set GO:0097458 (neuron part). In 10x Genomics PBMC dataset, we added the gene set CD8+ T-effector memory Term.

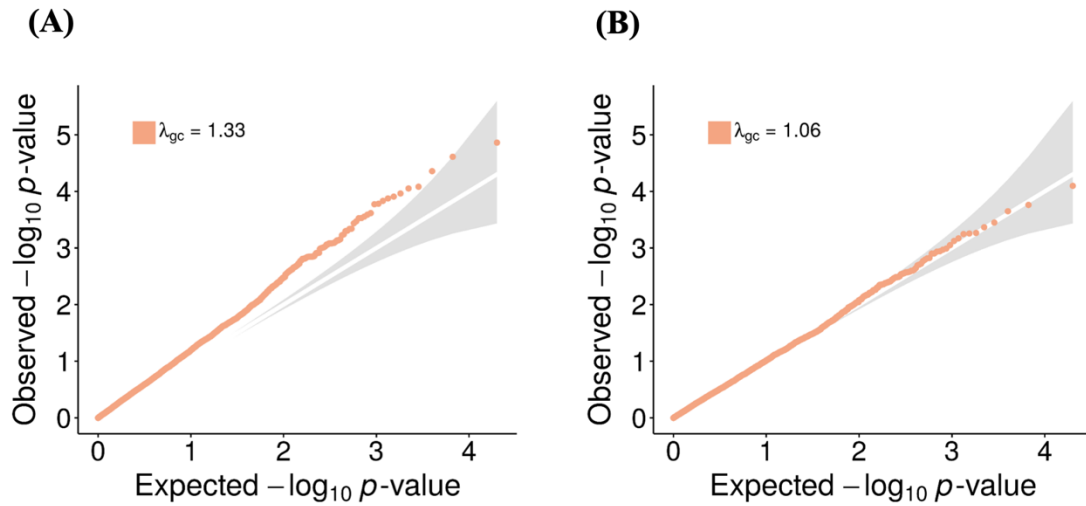

**Supplementary Figure 36. iDEA produces calibrated  $p$ -values in scRNA-seq based null simulations when using Louis Method to correct the observed information matrix.** Quantile-quantile plots of  $-\log_{10}(p\text{-values})$  are shown for: iDEA without Louis Method (A); iDEA with Louis method (B); respectively under the null that simulated one fixed scRNA-seq data set and permute the gene set 10,000 times. Here, the other parameters are set to be  $\tau_0 = -2, \tau_1 = 0$  and  $CR = 10\%$ .  $CR$  represents the percentage of genes inside the gene set.  $\lambda_{gc}$  is genomic control factor.

## Supplementary Notes

### Supplementary Note 1. EM-MCMC Inference Algorithm

The iDEA model is described in detail in the [Methods](#). Here, we describe the detailed algorithm for inference. As explained in the main text, our goal is to infer the posterior probability of  $\gamma_j = 1$  as evidence for  $j$ -th gene being DE and test the null hypothesis  $H_0: \tau_1 = 0$  that DE genes are not enriched in the gene set. To achieve both goals, we develop an efficient expectation maximization (EM)-Markov chain Monte Carlo (MCMC) algorithm. To simplify notation, we denote  $\boldsymbol{\beta}$  as the  $p$ -vector of the underlying true effect sizes, or  $\boldsymbol{\beta} = (\beta_1, \beta_2, \dots, \beta_p)^T$ . We denote  $\boldsymbol{\gamma}$  as the  $p$ -vector of the indicator variables, or  $\boldsymbol{\gamma} = (\gamma_1, \gamma_2, \dots, \gamma_p)^T$ . We denote  $\sigma_{e_j}^2$  as the variance of the marginal DE effect size estimate for  $j$ -th gene, or  $\sigma_{e_j}^2 = \text{se}^2(\hat{\beta}_j)$ . We treat both  $\boldsymbol{\beta}$  and  $\boldsymbol{\gamma}$  as missing data and write out the complete likelihood as

$$\begin{aligned}
 \log\text{Pr}(\hat{\boldsymbol{\beta}}, \boldsymbol{\beta}, \boldsymbol{\gamma} | \tau_0, \tau_1, \sigma_\beta^2) &= \log\{\text{Pr}(\hat{\boldsymbol{\beta}} | \boldsymbol{\beta}, \boldsymbol{\gamma}) \text{Pr}(\boldsymbol{\beta} | \boldsymbol{\gamma}, \sigma_\beta^2) \text{Pr}(\boldsymbol{\gamma} | \tau_0, \tau_1) \text{Pr}(\sigma_\beta^2 | a_\beta, b_\beta)\} \\
 &= -\frac{1}{2} \sum_{j=1}^p \gamma_j \left( \log(\sigma_{e_j}^2) + \frac{(\hat{\beta}_j - \beta_j)^2}{\sigma_{e_j}^2} \right) \\
 &\quad - \frac{1}{2} \sum_{j=1}^p \gamma_j \left( \log(\sigma_{e_j}^2 \sigma_\beta^2) + \frac{\beta_j^2}{\sigma_{e_j}^2 \sigma_\beta^2} \right) \\
 &\quad + \sum_{j=1}^p \gamma_j \log(\pi_j) + (1 - \gamma_j) \log(1 - \pi_j) \\
 &\quad - (a_\beta + 1) \log(\sigma_\beta^2) - b_\beta \sigma_\beta^{-2}, \tag{1}
 \end{aligned}$$

where we have also ignored the constant terms in the above equation and  $\pi_j = \frac{\exp(\tau_0 + a_j \tau_1)}{1 + \exp(\tau_0 + a_j \tau_1)}$ . With the above complete likelihood, we can derive the expectation step (E-Step) and maximization step (M-Step) as follows.

#### Expectation Step (E-Step)

In the E-Step, we obtain the expectation of equation (1)

$$Q = E[\log\text{Pr}(\hat{\boldsymbol{\beta}}, \boldsymbol{\beta}, \boldsymbol{\Gamma} | \boldsymbol{\tau}, \sigma_\beta^2)], \tag{2}$$

which involves evaluating the expectations  $E(\gamma_j)$ ,  $E(\gamma_j \beta_j)$  and  $E(\gamma_j \beta_j^2)$ . These expectations are obtained under the conditional distributions  $P(\beta_j, \gamma_j | \hat{\boldsymbol{\beta}}, \tau_0^{(t)}, \tau_1^{(t)}, (\sigma^{(t)})_\beta^2)$ , with  $\tau_0^{(t)}$ ,  $\tau_1^{(t)}$  and  $(\sigma^{(t)})_\beta^2$  being the estimates from the

previous iteration  $t$ . These conditional distributions are unfortunately not available in analytic forms. Therefore, we use Markov Chain Monte Carlo (MCMC) to obtain these expectations. Specifically, we develop a Gibbs sampling to sample the posterior distributions for  $\beta_j$  and  $\gamma_j$  in an alternate fashion. Afterwards, we use these posterior samples to evaluate the above expectations. To do so, we first integrate out  $\beta_j$  from the complete likelihood and obtain the conditional distribution for  $\gamma_j$  as

$$\Pr(\gamma_j = 1 | \hat{\boldsymbol{\beta}}, \tau_0^{(t)}, \tau_1^{(t)}, (\sigma^{(t)})_{\beta}^2) \propto \exp\left\{\frac{m_j^2}{2s_j^2} + \log(s_j) - \log(\sigma_{\beta}^{(t)}) + \log(\pi_j^{(t)})\right\}, \quad (3)$$

$$\Pr(\gamma_j = 0 | \hat{\boldsymbol{\beta}}, \tau_0^{(t)}, \tau_1^{(t)}) \propto 1 - \pi_j^{(t)}. \quad (4)$$

Then posterior distribution of  $\gamma_j$  is,

$$\gamma_j \sim \text{Bernoulli}\left(\frac{\Pr(\gamma_j = 1 | \hat{\boldsymbol{\beta}}, \tau_0^{(t)}, \tau_1^{(t)}, (\sigma^{(t)})_{\beta}^2)}{\Pr(\gamma_j = 1 | \hat{\boldsymbol{\beta}}, \tau_0^{(t)}, \tau_1^{(t)}, (\sigma^{(t)})_{\beta}^2) + \Pr(\gamma_j = 0 | \hat{\boldsymbol{\beta}}, \tau_0^{(t)}, \tau_1^{(t)}, (\sigma^{(t)})_{\beta}^2)}\right) \quad (5)$$

where  $m_j = \frac{\hat{\beta}_j}{1 + (\sigma_{\beta}^{(t)})^{-2}}$  and  $s_j^2 = \frac{\sigma_{\beta_j}^2}{1 + (\sigma_{\beta}^{(t)})^{-2}}$ . Next, we recognize from the complete likelihood that the conditional distribution of  $\beta_j$  given  $\gamma_j = 1$  is normal:

$$\beta_j | \gamma_j = 1 \sim N(m_j, s_j^2). \quad (6)$$

Certainly,  $\beta_j = 0$  if  $\gamma_j = 0$ .

### Maximization Step (M-Step)

In the M-Step, we obtain the parameter estimates for  $\tau_0, \tau_1$  and  $\sigma_{\beta}^2$  that maximize the Q function obtained in the E-Step. For  $\tau_0$  and  $\tau_1$ , we obtain the first derivatives of the Q function with respect to each parameter as

$$\begin{aligned} \frac{\partial Q}{\partial \tau_0} &= \sum_{j=1}^p (E(\gamma_j) - \pi_j), \\ \frac{\partial Q}{\partial \tau_1} &= \sum_{j=1}^p a_j (E(\gamma_j) - \pi_j). \end{aligned} \quad (7)$$

We also obtain the second derivatives as

$$\frac{\partial^2 Q}{\partial \tau_0^2} = \sum_{j=1}^p \pi_j (1 - \pi_j),$$

$$\begin{aligned}\frac{\partial^2 Q}{\partial \tau_0 \partial \tau_1} &= \sum_{j=1}^p a_j \pi_j (1 - \pi_j), \\ \frac{\partial^2 Q}{\partial \tau_1^2} &= \sum_{j=1}^p a_j^2 \pi_j (1 - \pi_j).\end{aligned}\quad (8)$$

where  $\pi_j$  is calculated as the expectation of the indicator variable  $\gamma_j$   $E(\gamma_j | \hat{\boldsymbol{\beta}}, \tau_0^{(t)}, \tau_1^{(t)}, (\sigma^{(t)})_{\beta}^2)$ . And  $\pi_j$  is used in the following Newton-Raphson algorithm to obtain the parameter estimate of the intercept  $\tau_0$  and gene set coefficient  $\tau_1$ . Afterwards, we use the Newton-Raphson algorithm for optimization and obtain estimates of  $\tau_0^{(t+1)}$  and  $\tau_1^{(t+1)}$ .

For  $\sigma_{\beta}^2$ , we obtain the first derivatives of the Q function with respect to  $\sigma_{\beta}^2$  as

$$\frac{\partial Q}{\partial \sigma_{\beta}^2} = \sigma_{\beta}^{-4} \left( \sum_{j=1}^p \frac{E(\gamma_j \beta_j^2)}{2\sigma_{\beta_j}^2} + b_{\beta} \right) - \sigma_{\beta}^{-2} \left( \frac{\sum_{j=1}^p E(\gamma_j)}{2} + a_{\beta} + 1 \right),$$

which leads to an analytical update for  $\sigma_{\beta}^2$  as

$$\left( \sigma_{\beta}^{(t+1)} \right)^2 = \frac{\sum_{j=1}^p \frac{E(\gamma_j \beta_j^2)}{2\sigma_{\beta_j}^2} + b_{\beta}}{\frac{\sum_{j=1}^p E(\gamma_j)}{2} + a_{\beta} + 1}.\quad (9)$$

The EM-MCMC algorithm thus iterates between the E-step and the M-step until converge. The EM-MCMC algorithm allows us to directly obtain the parameter estimate  $E(\gamma_j)$ , which is the posterior probability of  $j$ -th gene being a DE gene. This posterior probability is also commonly referred to as the posterior inclusion probability (PIP) in other settings. We use these posterior probabilities to serve as DE evidence. In addition, the EM-MCMC algorithm also provides an estimate for  $\tau_1$ , which, when paired with its standard error computed in the following section, allows us to construct a Wald test to test the null hypothesis of no gene set enrichment  $H_0: \tau_1 = 0$ .

## Supplementary Note 2. Louis Method for $p$ -value Computation

Here, we describe the details of the Louis method for computing the standard error of  $\hat{\tau}_1$ . In the EM-MCMC algorithm described in the previous section, we can obtain the information matrix for  $(\tau_0, \tau_1)$  based on the log complete likelihood  $\log \Pr(\hat{\boldsymbol{\beta}}, \boldsymbol{\beta}, \boldsymbol{\gamma} | \tau_0, \tau_1, \sigma_{\beta}^2)$  as described in equation (1). For completeness, we re-write the information matrix in the complete likelihood as a 2 by 2 matrix



$$I_c = \sum_{j=1}^p \hat{\pi}_j (1 - \hat{\pi}_j) \begin{pmatrix} 1 & a_j \\ a_j & a_j^2 \end{pmatrix}, \quad (10)$$

where  $\hat{\pi}_j = \frac{\exp(A_j \hat{\tau})}{1 + \exp(A_j \hat{\tau})}$  is computed based on the  $\hat{\tau}$  estimates from the last EM step and  $a_j$  is the annotation for  $j$ -th gene. Our goal, however, is to obtain the information matrix for  $(\tau_0, \tau_1)$  based on the marginal log likelihood  $\log \Pr(\hat{\beta} | \tau_0, \tau_1, \sigma_\beta^2)$ , also known as the observed likelihood. Such marginal information matrix can be obtained based on the complete information matrix through an adjustment using the Louis method<sup>2,3</sup>. Specifically, with the posterior inclusion probability  $\text{PIP}_j$  for  $j$ -th gene obtained from EM steps, we compute the information matrix in the incomplete likelihood as a 2 by 2 matrix

$$I_{ic} = \sum_{j=1}^p \text{PIP}_j (1 - \text{PIP}_j) \begin{pmatrix} 1 & a_j \\ a_j & a_j^2 \end{pmatrix}. \quad (11)$$

Finally, the observed information matrix  $I_o$  is adjusted by

$$I_o = I_c - I_{ic}$$

Once we compute the marginal information matrix, we can obtain the standard error  $\text{se}^2(\hat{\tau}_1)$  as the corresponding element in the inverse of the information matrix  $I_o$ .

### **Supplementary Note 3. Application to an oral carcinoma bulk RNAseq dataset**

To illustrate the flexibility of the modeling framework in iDEA, we applied iDEA to analyze a publicly available bulk RNASeq dataset from Tuch et al<sup>4</sup>. The bulk RNAseq dataset consists of gene expression measurements for 10,540 genes on tumors and matched normal tissue from three patients with oral squamous cell carcinomas. We carried out both GSE analyses and DE analyses on comparing the matched tumor and normal pairs.

We first applied iDEA and other GSE methods to detect significantly enriched gene sets across our compiled database of 12,033 human gene sets. The  $p$ -values of the enriched gene sets from iDEA are shown in [Supplementary Figure 30A](#). We also constructed an empirical null  $p$ -value distribution by permuting the gene labels for each gene set 10 times. Consistent with both simulations and scRNA-seq data applications, we found that the  $p$ -values in the permuted data from iDEA ( $\lambda_{gc} = 1.07$ ), fGSEA ( $\lambda_{gc} = 0.99$ ), PAGE ( $\lambda_{gc} = 0.98$ ), and GSEA ( $\lambda_{gc} = 0.99$ ) are well behaved, while that from CAMERA show severe deflation ( $\lambda_{gc} =$

0.12)( [Supplementary Figure 30B](#)). For each method, we relied on the empirical null distribution of  $p$ -values to compute power in detecting enriched gene sets based on a fixed empirical FDR. Consistent with both simulations and scRNA-seq data applications, iDEA displays higher power compared to the other GSE methods ([Supplementary Figure 30C](#)). For example, at an empirical FDR of 5%, iDEA identified 2075 significantly enriched gene sets, which is 17%, 80%, 20% higher than fGSEA (1777), CAMERA (1154), and GSEA (1733) respectively. While PAGE (2079) also displays higher power in number of detecting the significant gene sets, the top gene sets identified by iDEA are most closely related to oral squamous cell carcinomas or tumor related pathways. For example, among the top 10 gene sets identified by iDEA, 7 are related to tumor pathways. As a comparison, 5 among the top 10 gene sets identified by PAGE are related to tumor pathways. Specifically, enriched gene sets identified by iDEA include the SMID\_BREAST\_CANCER\_NORMAL\_LIKE\_UP<sup>5</sup>, SWEET\_LUNG\_CANER\_KRAS\_DN<sup>6</sup> and relevant GO items such as GO:0031012 (extracellular matrix<sup>7</sup>), GO:0043292 (contractile fiber<sup>8</sup>). In order to quantify the biological significance of gene sets identified by different GSE methods, we quantified the relevance between gene sets and oral squamous cell carcinomas in an unbiased way by searching the related literatures in PubMed (details in Materials and Methods). Indeed, in the top 50 enriched gene sets identified by different methods, iDEA identified more gene sets relevant to oral squamous cell carcinomas (30) than fGSEA (23), CAMERA (30), PAGE (23), and GSEA (25). The higher number of detected enriched gene sets relevant to oral squamous cell carcinomas and cancer growth by iDEA provides convergent support for the higher power of iDEA for GSE analysis.

Next, we applied iDEA for DE analysis to identify DE genes. We obtained the summary statistics from DESeq2. Consistent with both simulations and scRNA-seq data applications, iDEA identified more DE genes than zinger. For example, at an empirical FDR of 1%, iDEA identified 409 DE genes, while DESeq2 only identified 1 ([Supplementary Figure 30D](#)). The 50 selected important DE genes identified by iDEA clearly distinguishes the normal tissue and cancer tissue ([Supplementary Figure 30F](#)). Importantly, using the key markers provided by the original study<sup>9</sup>, iDEA identified 262 genes directly related to oral squamous cell carcinomas or important genes involved in common tumors; while DESeq2 only identified 1. The higher number of DE genes relevant to oral squamous cell carcinomas or common tumors detected by iDEA provides convergent support for its higher power for DE analysis. Important DE genes involved in Oral squamous

cell carcinoma development that are detected by iDEA but missed by DESeq2 include *CRNN*<sup>10</sup>, *WNT10A*<sup>11</sup>, *PTHLH*<sup>12</sup>, *KRT6*<sup>13</sup>, *IGF1*<sup>14</sup>, *PTGFR*<sup>15</sup>, *TGFBR3*<sup>16</sup>. Among them, *CRNN* has been studied to be the potential prognostic marker of OSCC due to its downregulation in oral squamous cell carcinoma samples, *WNT10A* plays an important role in accelerating of the progression of carcinomas via activating EMTs and local invasiveness<sup>11</sup>, *PTHLH* is indispensable for the pathogenesis of oral squamous cell carcinoma by affecting cell proliferation and cell cycle<sup>12</sup>. *TGFBR3* is an important activator of *GDF10*, which is downregulated during oral carcinogenesis and involved in the suppression of cell survival<sup>16</sup>.

Further, we also evaluated the GC content and gene length effect. For all the genes in the dataset, we first calculated the GC content and gene length and then we create two gene sets corresponding to the levels of GC content and gene length. Specifically, for the GC content, we use the continuous value of GC content for each gene as the gene set. For the gene length, we created a binary gene set if gene length is higher than the average of the gene length, than this gene is in this gene set and annotated as 1 otherwise 0. Finally, by adding these two gene sets into iDEA, we calculated the  $p$ -values for these two gene set to represent the significance of GC content effect and gene length effect correspondingly. In the analyses, we did not observe obvious GC content effect ( $p$ -value = 0.31) and gene length effect ( $p$ -value = 0.08) in this dataset.

#### Supplementary Note 4. iDEA variant

##### Model and statistical inference

As explained in the Discussion, the iDEA model makes an implicit assumption that the prior depends on the sample size. Here, we provide an iDEA variant with alternative modeling assumption that does not have the prior dependence on the sample size. Here, the input summary statistics are again in the form of marginal DE effect size estimate  $\hat{\beta}_j$  and its standard error  $se(\hat{\beta}_j)$ ,  $j = 1, 2, \dots, p$ , where  $p$  is the number of genes. We assume that the true effect size  $\beta_j$  follows a mixture of two distributions depending on whether  $j$ -th gene is a DE gene or not:

$$\hat{\beta}_j = \beta_j + \epsilon_j, \epsilon_j \sim N(0, se(\hat{\beta}_j)^2) \quad (12)$$

$$\beta_j \sim \pi_j N(0, \sigma_\beta^2) + (1 - \pi_j)\delta_0 \quad (13)$$

where  $\pi_j$  is the prior probability of being a DE gene;  $\sigma_\beta^2$  is a scaling factor that determines the DE effect size strength; and  $\delta_0$  is the Dirac function that represents a point mass at zero. Therefore, with proportion  $\pi_j$ ,  $j$ -th gene is a DE gene and its

DE effect size  $\beta_j$  follows a normal distribution with a large variance  $\sigma_\beta^2$ . With proportion  $1 - \pi_j$ ,  $j$ -th gene is a non-DE gene and its DE effect size is exactly zero

Note that, compared to the original iDEA model, we have removed  $se(\hat{\beta}_j)^2$  and only maintain the  $\sigma_\beta^2$  as the variance in the prior distribution of true effect size. In this way, the effect size  $\beta_j$  is no longer depend on the standard error  $se(\hat{\beta}_j)$  and thus the sample size. For the rest of the algorithm and methodology, we just followed the same procedure as the original model. Here, we mainly report the modified parts in the EM algorithm when using this model. The complete likelihood changed to be the following

$$\begin{aligned}
\log\Pr(\hat{\boldsymbol{\beta}}, \boldsymbol{\beta}, \boldsymbol{\gamma}|\tau_0, \tau_1, \sigma_\beta^2) &= \log\{\Pr(\hat{\boldsymbol{\beta}}|\boldsymbol{\beta}, \boldsymbol{\gamma}) \Pr(\boldsymbol{\beta}|\boldsymbol{\gamma}, \sigma_\beta^2) \Pr(\boldsymbol{\gamma}|\tau_0, \tau_1) \Pr(\sigma_\beta^2|a_\beta, b_\beta)\} \\
&= -\frac{1}{2}\sum_{j=1}^p \gamma_j \left( \log(\sigma_{e_j}^2) + \frac{(\hat{\beta}_j - \beta_j)^2}{\sigma_{e_j}^2} \right) \\
&\quad -\frac{1}{2}\sum_{j=1}^p \gamma_j \left( \log(\sigma_\beta^2) + \frac{\beta_j^2}{\sigma_\beta^2} \right) \\
&\quad + \sum_{j=1}^p \gamma_j \log(\pi_j) + (1 - \gamma_j) \log(1 - \pi_j) \\
&\quad - (a_\beta + 1) \log(\sigma_\beta^2) - b_\beta \sigma_\beta^{-2}
\end{aligned} \tag{14}$$

In the E-step:

We obtained the expectation of log likelihood,  $Q = E[\log\Pr(\hat{\boldsymbol{\beta}}, \boldsymbol{\beta}, \boldsymbol{\Gamma}|\boldsymbol{\tau}, \sigma_\beta^2)]$ .

The posterior distribution of  $\boldsymbol{\beta}$  and  $\boldsymbol{\gamma}$  changes to be:

$$\Pr(\gamma_j = 1 | \hat{\boldsymbol{\beta}}, \tau_0^{(t)}, \tau_1^{(t)}, (\sigma^{(t)})_\beta^2) \propto \exp\left\{ \frac{m_j^2}{2s_j^2} + \log(s_j) - \log(\sigma_\beta^{(t)}) + \log(\pi_j^{(t)}) \right\}, \tag{15}$$

$$\Pr(\gamma_j = 0 | \hat{\boldsymbol{\beta}}, \tau_0^{(t)}, \tau_1^{(t)}) \propto 1 - \pi_j^{(t)}. \tag{16}$$

Then posterior distribution of  $\gamma_j$  is,

$$\gamma_j \sim \text{Bernoulli}\left( \frac{\Pr(\gamma_j = 1 | \hat{\boldsymbol{\beta}}, \tau_0^{(t)}, \tau_1^{(t)}, (\sigma^{(t)})_\beta^2)}{\Pr(\gamma_j = 1 | \hat{\boldsymbol{\beta}}, \tau_0^{(t)}, \tau_1^{(t)}, (\sigma^{(t)})_\beta^2) + \Pr(\gamma_j = 0 | \hat{\boldsymbol{\beta}}, \tau_0^{(t)}, \tau_1^{(t)}, (\sigma^{(t)})_\beta^2)} \right) \tag{17}$$

where  $m_j = \frac{\hat{\beta}_j(\sigma^{(t)})_\beta^2}{\sigma_{e_j}^2 + (\sigma^{(t)})_\beta^2}$  and  $s_j^2 = \frac{\sigma_{e_j}^{2*}(\sigma^{(t)})_\beta^2}{\sigma_{e_j}^2 + (\sigma^{(t)})_\beta^2}$ . Next, we recognize from the complete

likelihood that the conditional distribution of  $\beta_j$  given  $\gamma_j = 1$  is normal:

$$\beta_j | \gamma_j = 1 \sim N(m_j, s_j^2)$$

Certainly,  $\beta_j = 0$  if  $\gamma_j = 0$ .

In the M-step, estimation of intercept  $\tau_0$  and gene set enrichment parameter  $\tau_1$  is just following the same Newton-Raphson algorithm. For the estimation of  $\sigma_\beta^2$ , we obtain the first derivatives of the Q function with respect to  $\sigma_\beta^2$  as

$$\frac{\partial Q}{\partial \sigma_\beta^2} = \sigma_\beta^{-4} \left( \sum_{j=1}^p \frac{E(\gamma_j \beta_j^2)}{2} + b_\beta \right) - \sigma_\beta^{-2} \left( \frac{\sum_{j=1}^p E(\gamma_j)}{2} + a_\beta + 1 \right),$$

which leads to an analytical update for  $\sigma_\beta^2$  as

$$\left( \sigma_\beta^{(t+1)} \right)^2 = \frac{\sum_{j=1}^p \frac{E(\gamma_j \beta_j^2)}{2} + b_\beta}{\frac{\sum_{j=1}^p E(\gamma_j)}{2} + a_\beta + 1}. \quad (18)$$

### Simulations and real data applications in iDEA variant

Following the same procedures of simulations in manuscript, we compared the performance of iDEA modeling on beta effect size with the commonly used GSE analysis methods fGSEA, CAMERA, PAGE and GSEA. We found that consistent with the results generated from modeling the z score, iDEA produces well-calibrated  $p$ -values under the null in different simulation scenarios ([Supplementary Figure 31](#)) despite slight inflation when the number of DE genes is small. Besides type I error control, we found that iDEA is more powerful than the other GSE methods across a range of alternative scenarios at a fixed false discovery rate (FDR) of 5% ([Supplementary Figure 32](#)). For DE analysis, we found that iDEA can improve DE analysis power regardless of whether the summary statistics are from MAST, edgeR or zingerR ([Supplementary Figure 33](#)). For example, with  $\tau_1 = 5$  and CR = 10%, iDEA achieves a power of 84%, 61% and 84% at a true FDR of 5%, when it uses the input summary statistics obtained from zingerR, MAST and edgeR, respectively. In contrast, the power of these three different DE methods are 66%, 53%, and 67%, respectively ([Supplementary Figure 33](#)).

We also compared the performance of iDEA modeling on beta effect size in DE analysis and GSE analysis in the mouse neuronal scRNAseq dataset ([Supplementary Figure 34](#)). Consistent with simulations, the GSE  $p$ -values in the permuted data from iDEA ( $\lambda_{gc} = 1.19$ ), fGSEA ( $\lambda_{gc} = 1.08$ ), PAGE ( $\lambda_{gc} = 0.99$ ), and GSEA ( $\lambda_{gc} = 0.94$ ) are all well-behaved, while the  $p$ -values from CAMERA show severe deflation ( $\lambda_{gc} = 0.11$ ) ([Supplementary Figure 34A](#)). Also consistent with simulations, iDEA identified more significantly enriched gene sets compared

to the other methods ([Supplementary Figure 34B](#)). For example, at an FDR of 5%, iDEA identified 1205 enriched gene sets, which is four times higher than the second-best method (GSEA, 246). In contrast, fGSEA, CAMERA and PAGE identified 236, 134, and 205 enriched gene sets, respectively. Many of the top 1% enriched gene sets are associated with neuron structures and functions such as neuron projection (GO:0043005)<sup>17</sup>, neuron part (GO:0097458)<sup>18</sup> axon (GO:0030424)<sup>19</sup>, synapse (GO:0045202)<sup>20</sup> and ion transport (GO:0006811)<sup>20</sup>. In addition, use of iDEA recovered 98 out of the 237 gene sets known to be involved in inflammatory itch as provided by the original paper<sup>9</sup>. In contrast, fGSEA, CAMERA, PAGE, and fGSEA identified 31, 20, 19, and 29 gene sets among them, respectively. The recovery of more enriched gene sets relevant to inflammation and itch by iDEA compared to the other GSE methods provides convergent support for the greater power of iDEA when modeling on beta effect size directly compared to the other methods for GSE analysis.

We next applied iDEA for DE analysis to identify DE genes with adding the gene set neuron part (GO:0097458). Again, iDEA identified more DE genes than zingeR ([Supplementary Figure 34C](#)). At an FDR of 1%, iDEA detected 1,222 DE genes, which is 23.0% higher than zingeR (993). Importantly, consistent with the power gain brought by iDEA, it detected 77 DE genes out of top 100 previously known NP1 DE genes listed in the original study, while zingeR detected 75 DE genes.

### **Supplementary Note 5. Bayesian model averaging (BMA) approach**

Besides performing DE analysis in iDEA in the real data based on a pre-selected gene set, we also developed a new strategy to aggregate DE evidence on a particular gene across all gene sets through Bayesian model averaging (BMA). Specifically, for the given gene, we denote its posterior inclusion probability (PIP) obtained using the gene set  $k$  as  $PIP_k$ . The corresponding Bayes factor quantifying its DE evidence based on the gene set  $k$  is  $BF_k = PIP_k / (1 - PIP_k)$ . With equal prior weights on different gene sets, the average Bayes factor quantifying its DE evidence based on all  $K$  gene sets is thus  $ABF = \frac{1}{K} \sum_{k=1}^K BF_k$ , which can be converted back to a posterior inclusion probability as  $PIP = ABF / (1 + ABF)$ . We found that PIPs computed this way is highly correlated with the PIPs computed based on the pre-selected gene set ([Supplementary Figure 35](#)). We now provide both options for computing PIPs for quantifying DE evidence: biologists can choose to use pre-selected gene sets that are known to be relevant to the particular experiments, as is the case for all the real data applications; alternatively,

biologists also have the option of using the Bayesian model averaging when such prior knowledge is not available.

### **Supplementary Note 6. Gene set overlap**

Previously we followed most existing GSE approaches and accounted for test non-independence due to gene set overlap through permutation. In addition, we also performed new analysis to further examine the issue of gene set overlap in the real data applications. We adopted the method proposed by Jiang and Gentleman<sup>21</sup> to examines pairs of gene sets one at a time. For each pair of gene set, Jiang's method divides genes into three categories: one category of genes that are only in the first gene set, one category of genes that are only in the second gene set, and one category of genes that are common in both gene sets. Afterwards, Jiang's method calculates three  $p$ -values, one for each category of genes. By computing  $p$ -values in each set, we can explicitly deconvolute the results in the presence of gene set overlap. Here, we mainly applied Jiang's method to analyze the top 50 gene sets identified by iDEA in human embryonic data and mouse neuron cell data in order to further dissect particular set of genes that drive the enrichment signal. (Note that we did not apply to all significant gene sets due to the heavy computational burden of Jiang's method and the gene set overlap is moderate compare to the gene set size). Specifically, there are 1,225 pairwise combinations among top 50 gene sets. For each real data we checked, we first construct the pairwise combinations of gene sets among top 50 significant gene sets identified by iDEA and for each pair, and then we filtered out gene set pairs which has less than 20 genes overlap (due to computational stability). For each pair which has larger than 20 genes in overlap, we calculated above mentioned three categories of  $p$ -values. Then we checked the  $p$ -values of the category of genes that are common in both gene sets and the  $p$ -values of the category of genes that are unique in gene sets respectively. For example, in the human embryonic data, 692 of the 1,225 gene set pairs have higher than 20 genes in overlap. For each of these 692 gene set pairs in turn, we calculated the three  $p$ -values as mentioned in the previous paragraph. Among the total 2,076 adjusted  $p$ -values (Bonferroni correction) we calculated, 1,397 of them are less than 0.05. We first look at the intersection part, 35 out of 692 intersection sets have adjusted  $p$ -value is less than 0.05. For the disjoint parts, 1,362 out of 1,384 are significant. This observation suggests that among the top 50 significant gene sets we identified, gene set specific genes are significantly enriched, suggesting that it is not the overlapped genes that drive the enrichment signal and that gene set overlap does not appear to introduce excessive false signals. We further looked at the combination of the

top first gene set GO:0001944 (vasculature development) ([Supplementary Table 10](#)). From the table, we observed that the significance of this gene set is induced by both the overlapping parts and non-overlapping parts. Following the same procedure, we also applied Jiang's method to analyze the top 50 gene sets identified by iDEA in the mouse sensory neuron scRNA-seq data. 1,025 out of 1,225 gene set pairs have higher than 20 genes in overlap. For each of these 1,025 gene set pairs in turn, we calculated the three  $p$ -values as mentioned in the previous paragraph. Among the total 3,075 adjusted  $p$ -values (Bonferroni correction) we calculated, 2,603 of them are less than 0.05. We first look at the intersection part, 889 out of 1,025 intersection sets have adjusted  $p$ -value is less than 0.05. For the disjoint parts, 1,714 out of 2,050 are significant. We further looked at the combination of the top first gene set GO:0044425 (obsolete membrane part) ([Supplementary Table 11](#)). From the table, we observed that the significance of this gene set is induced by both the overlapping parts and non-overlapping parts.

### **Supplementary Note 7. Cell types identification in the three scRNA-seq datasets**

For all the real datasets we analyzed, one of our real data contains cell types that are known *a priori* and not inferred from the whole expression matrix, while the other two data contain cell types that are extensively validated through approaches other than inferring based on the whole expression matrix. Specifically, for the human embryonic stem cell scRNAseq dataset, the cell types are obtained from fluorescence-activated cell sorting (FACS) analysis before mixing for scRNA-seq. FACS relies on known cell type markers and represents a somewhat unbiased strategy for cell type clustering<sup>22</sup>. For the mouse neuronal scRNAseq dataset, the cell types are initially inferred through an iterative PCA-based procedure and are further validated by comparing the hierarchical relationship of the neuronal types with the known developmental origin of sensory neuron types, as well as by comparing neurons with distinct and characteristic soma sizes in their identified neuronal class. In addition, the inferred neuronal cell types are further confirmed by double and triple immunohistochemical staining (e.g. NP1 cell type by staining of *PLXNC1*). For the 10x Genomics PBMC scRNASeq dataset, the identity of cell types was inferred by aligning cluster-specific genes to known markers of distinct PBMC populations as well as comparing against the transcriptomes of the purified populations in PBMC subsets. Their approach has been found to be largely consistent with conventional marker-based methods and the major cell types reach to the expected ratios in PBMCs. We have also displayed t-SNE plot in



[Supplementary Figure 22](#), which clearly shows distinct cell clusters. Because the cell types in these data are validated through various approaches, the DE analysis results are less likely influenced by the cell type inference step as compared to other data that are fully relying on the whole gene expression matrix for cell type inference.

## Supplementary Tables

**Supplementary Table 1. The results from iDEA to detect top 50 enriched gene sets on human embryonic stem cell scRNA-seq data**

| Rank | Gene Set                                        | Count | Coefficient | Variance | P-value   |
|------|-------------------------------------------------|-------|-------------|----------|-----------|
| 1    | GO_VASCULATURE_DEVELOPMENT                      | 429   | 0.000       | 0.016    | 7.340E-18 |
| 2    | GO_BLOOD_VESSEL_MORPHOGENESIS                   | 332   | 1.203       | 0.021    | 1.070E-16 |
| 3    | SCHUETZ_BREAST_CANCER_DUCTAL_INVASIVE_UP        | 310   | 1.267       | 0.024    | 3.650E-16 |
| 4    | GO_ANGIOGENESIS                                 | 268   | 1.344       | 0.028    | 1.310E-15 |
| 5    | LIU_PROSTATE_CANCER_DN                          | 424   | 0.992       | 0.016    | 1.930E-15 |
| 6    | SWEET_LUNG_CANCER_KRAS_DN                       | 377   | 1.048       | 0.018    | 4.590E-15 |
| 7    | ONDER_CDH1_TARGETS_2_DN                         | 384   | 1.020       | 0.017    | 8.180E-15 |
| 8    | SMID_BREAST_CANCER_NORMAL_LIKE_UP               | 361   | 1.110       | 0.021    | 9.870E-15 |
| 9    | GO_SINGLE_ORGANISM_CELL_ADHESION                | 370   | 1.024       | 0.018    | 3.300E-14 |
| 10   | GO_ANCHORING_JUNCTION                           | 468   | 0.848       | 0.013    | 5.390E-14 |
| 11   | LIM_MAMMARY_STEM_CELL_UP                        | 443   | 0.906       | 0.015    | 8.270E-14 |
| 12   | PASINI_SUZ12_TARGETS_DN                         | 305   | 1.076       | 0.021    | 1.410E-13 |
| 13   | BOQUEST_STEM_CELL_DN                            | 201   | 1.543       | 0.044    | 2.220E-13 |
| 14   | CHARAFE_BREAST_CANCER_LUMINAL_VS_MESENCHYMAL_DN | 442   | 0.853       | 0.014    | 4.830E-13 |
| 15   | BENPORATH_ES_1                                  | 372   | 0.902       | 0.016    | 4.910E-13 |
| 16   | GO_REGULATION_OF_SYSTEM_PROCESS                 | 390   | 0.935       | 0.017    | 1.140E-12 |
| 17   | GO_APICAL_PART_OF_CELL                          | 281   | 1.108       | 0.024    | 1.210E-12 |
| 18   | GO_EXTRACELLULAR_MATRIX                         | 326   | 1.011       | 0.020    | 1.440E-12 |
| 19   | GO_CELL_CELL_JUNCTION                           | 335   | 0.976       | 0.019    | 1.610E-12 |
| 20   | DELYS_THYROID_CANCER_UP                         | 379   | 0.933       | 0.017    | 1.770E-12 |
| 21   | GO_WOUND_HEALING                                | 393   | 0.893       | 0.016    | 2.510E-12 |
| 22   | RODWELL_AGING_KIDNEY_UP                         | 418   | 0.863       | 0.016    | 4.190E-12 |
| 23   | CHARAFE_BREAST_CANCER_LUMINAL_VS_BASAL_DN       | 402   | 0.863       | 0.016    | 4.500E-12 |
| 24   | GO_REGULATION_OF_VASCULATURE_DEVELOPMENT        | 200   | 1.387       | 0.040    | 5.160E-12 |
| 25   | SMID_BREAST_CANCER_LUMINAL_B_DN                 | 428   | 0.853       | 0.015    | 6.110E-12 |
| 26   | SABATES_COLORECTAL_ADENOMA_DN                   | 198   | 1.342       | 0.039    | 9.900E-12 |
| 27   | GO_LEUKOCYTE_MIGRATION                          | 191   | 1.399       | 0.043    | 1.550E-11 |
| 28   | LINDGREN_BLADDER_CANCER_CLUSTER_2B              | 353   | 0.909       | 0.018    | 2.180E-11 |
| 29   | GO_TAXIS                                        | 366   | 0.892       | 0.018    | 2.540E-11 |

|    |                                                                 |     |       |       |           |
|----|-----------------------------------------------------------------|-----|-------|-------|-----------|
| 30 | GO_POSITIVE_REGULATION_OF_MAPK_CASCADE                          | 393 | 0.845 | 0.016 | 2.560E-11 |
| 31 | CREIGHTON_ENDOCRINE_THERAPY_RESISTANCE_5                        | 431 | 0.793 | 0.014 | 2.880E-11 |
| 32 | GO_REGULATION_OF_BODY_FLUID_LEVELS                              | 410 | 0.825 | 0.016 | 3.680E-11 |
| 33 | GO_REGULATION_OF_NEURON_PROJECTION_DEVELOPMENT                  | 364 | 0.857 | 0.017 | 4.570E-11 |
| 34 | DUTERTRE ESTRADIOL_RESPONSE_24HR_DN                             | 487 | 0.732 | 0.012 | 5.480E-11 |
| 35 | GO_MEMBRANE_MICRODOMAIN                                         | 259 | 1.038 | 0.025 | 6.770E-11 |
| 36 | GSE2405_0H_VS_3H_A_PHAGOCYTOPHILUM_STIM_NEUTROPHIL_UP           | 178 | 1.335 | 0.043 | 1.400E-10 |
| 37 | WANG_RESPONSE_TO_GSK3_INHIBITOR_SB216763_DN                     | 340 | 0.831 | 0.017 | 1.500E-10 |
| 38 | GO_CELL_SUBSTRATE_JUNCTION                                      | 385 | 0.791 | 0.015 | 1.520E-10 |
| 39 | GO_CELL_LEADING_EDGE                                            | 323 | 0.879 | 0.019 | 1.640E-10 |
| 40 | REACTOME_HEMOSTASIS                                             | 386 | 0.815 | 0.016 | 1.660E-10 |
| 41 | GO_NEGATIVE_REGULATION_OF_LOCOMOTION                            | 227 | 1.075 | 0.028 | 1.710E-10 |
| 42 | GO_ACTIN_FILAMENT_BASED_PROCESS                                 | 408 | 0.777 | 0.015 | 1.890E-10 |
| 43 | SCHAEFFER_PROSTATE_DEVELOPMENT_48HR_UP                          | 425 | 0.757 | 0.014 | 2.070E-10 |
| 44 | GO_POSITIVE_REGULATION_OF_CELL_DEVELOPMENT                      | 407 | 0.779 | 0.015 | 2.120E-10 |
| 45 | GO_CELL_MORPHOGENESIS_INVOLVED_IN_DIFFERENTIATION               | 456 | 0.734 | 0.013 | 2.600E-10 |
| 46 | GO_POSITIVE_REGULATION_OF_NERVOUS_SYSTEM_DEVELOPMENT            | 374 | 0.801 | 0.016 | 3.540E-10 |
| 47 | CHYLA_CBFA2T3_TARGETS_UP                                        | 324 | 0.893 | 0.020 | 4.210E-10 |
| 48 | VERHAAK_AML_WITH_NPM1_MUTATED_DN                                | 205 | 1.165 | 0.035 | 4.230E-10 |
| 49 | GO_REGULATION_OF_CELL_MORPHOGENESIS_INVOLVED_IN_DIFFERENTIATION | 304 | 0.870 | 0.020 | 5.390E-10 |
| 50 | WALLACE_PROSTATE_CANCER_RACE_UP                                 | 232 | 1.038 | 0.029 | 8.030E-10 |

*P*-values were determined by two-sided Wald test.

**Supplementary Table 2. The results from iDEA to detect top 50 enriched gene sets on mouse neuronal cell scRNA-seq data**

| Rank | Gene Ontology | Gene Ontology Term                           | Count | Coefficient | Variance | P-value   |
|------|---------------|----------------------------------------------|-------|-------------|----------|-----------|
| 1    | GO:0044425    | membrane part                                | 3688  | 1.040       | 0.004    | 2.260E-72 |
| 2    | GO:0043005    | neuron projection                            | 1121  | 1.240       | 0.007    | 8.680E-63 |
| 3    | GO:0071944    | cell periphery                               | 2840  | 0.996       | 0.005    | 4.630E-63 |
| 4    | GO:0016020    | membrane                                     | 5081  | 0.995       | 0.005    | 3.970E-63 |
| 5    | GO:0097458    | neuron part                                  | 1472  | 1.140       | 0.006    | 4.200E-62 |
| 6    | GO:0005886    | plasma membrane                              | 2762  | 0.994       | 0.005    | 2.510E-62 |
| 7    | GO:0031224    | intrinsic component of membrane              | 2845  | 0.934       | 0.005    | 6.740E-56 |
| 8    | GO:0044459    | plasma membrane part                         | 1498  | 1.040       | 0.006    | 3.880E-51 |
| 9    | GO:0045202    | synapse                                      | 1108  | 1.130       | 0.007    | 2.210E-50 |
| 10   | GO:0006811    | ion transport                                | 978   | 1.180       | 0.008    | 3.850E-51 |
| 11   | GO:0044456    | synapse part                                 | 867   | 1.190       | 0.009    | 1.420E-47 |
| 12   | GO:0016021    | integral component of membrane               | 2758  | 0.877       | 0.005    | 2.020E-48 |
| 13   | GO:0006812    | cation transport                             | 699   | 1.280       | 0.010    | 6.760E-48 |
| 14   | GO:0030424    | axon                                         | 451   | 1.460       | 0.014    | 1.420E-44 |
| 15   | GO:0120025    | plasma membrane bounded cell projection      | 1588  | 0.948       | 0.006    | 3.180E-43 |
| 16   | GO:0036477    | somatodendritic compartment                  | 783   | 1.180       | 0.010    | 8.090E-43 |
| 17   | GO:0015672    | monovalent inorganic cation transport        | 306   | 1.650       | 0.019    | 1.430E-42 |
| 18   | GO:0098800    | inner mitochondrial membrane protein complex | 101   | 2.700       | 0.054    | 1.410E-37 |
| 19   | GO:0042995    | cell projection                              | 1726  | 0.891       | 0.006    | 1.080E-39 |
| 20   | GO:0043269    | regulation of ion transport                  | 466   | 1.360       | 0.014    | 3.400E-39 |
| 21   | GO:0098798    | mitochondrial protein complex                | 126   | 2.230       | 0.040    | 9.350E-35 |
| 22   | GO:0043209    | myelin sheath                                | 179   | 1.910       | 0.029    | 1.270E-35 |
| 23   | GO:0032879    | regulation of localization                   | 1923  | 0.828       | 0.006    | 3.380E-36 |
| 24   | GO:0051049    | regulation of transport                      | 1307  | 0.920       | 0.007    | 1.220E-35 |
| 25   | GO:0044455    | mitochondrial membrane part                  | 181   | 1.860       | 0.029    | 3.370E-34 |
| 26   | GO:0034220    | ion transmembrane transport                  | 560   | 1.210       | 0.013    | 5.690E-35 |
| 27   | GO:0031226    | intrinsic component of plasma membrane       | 785   | 1.060       | 0.010    | 6.070E-34 |
| 28   | GO:0030425    | dendrite                                     | 557   | 1.180       | 0.013    | 9.280E-33 |
| 29   | GO:0098793    | presynapse                                   | 444   | 1.280       | 0.015    | 8.470E-33 |
| 30   | GO:0099536    | synaptic signaling                           | 526   | 1.200       | 0.013    | 1.460E-32 |

|    |            |                                                                |      |        |       |           |
|----|------------|----------------------------------------------------------------|------|--------|-------|-----------|
| 31 | GO:0098590 | plasma membrane region                                         | 785  | 1.040  | 0.010 | 1.990E-32 |
| 32 | GO:0042391 | regulation of membrane potential                               | 316  | 1.440  | 0.019 | 7.980E-32 |
| 33 | GO:0005887 | integral component of plasma membrane                          | 742  | 1.050  | 0.011 | 9.240E-32 |
| 34 | GO:0098660 | inorganic ion transmembrane transport                          | 430  | 1.280  | 0.016 | 1.290E-31 |
| 35 | GO:0099537 | trans-synaptic signaling                                       | 518  | 1.190  | 0.014 | 2.100E-31 |
| 36 | GO:0008324 | cation transmembrane transporter activity                      | 404  | 1.310  | 0.017 | 5.890E-32 |
| 37 | GO:0098916 | anterograde trans-synaptic signaling                           | 510  | 1.190  | 0.014 | 6.310E-31 |
| 38 | GO:0007268 | chemical synaptic transmission                                 | 510  | 1.190  | 0.014 | 6.310E-31 |
| 39 | GO:0090304 | nucleic acid metabolic process                                 | 3107 | -0.965 | 0.009 | 5.220E-31 |
| 40 | GO:0055085 | transmembrane transport                                        | 785  | 1.020  | 0.010 | 5.800E-31 |
| 41 | GO:0098662 | inorganic cation transmembrane transport                       | 400  | 1.300  | 0.017 | 8.720E-31 |
| 42 | GO:0015077 | monovalent inorganic cation transmembrane transporter activity | 222  | 1.620  | 0.026 | 1.630E-30 |
| 43 | GO:0098655 | cation transmembrane transport                                 | 451  | 1.230  | 0.015 | 1.820E-30 |
| 44 | GO:0070469 | respiratory chain                                              | 63   | 3.060  | 0.095 | 8.120E-27 |
| 45 | GO:0097060 | synaptic membrane                                              | 395  | 1.280  | 0.017 | 1.110E-29 |
| 46 | GO:0003008 | system process                                                 | 975  | 0.929  | 0.009 | 1.050E-29 |
| 47 | GO:0023052 | signaling                                                      | 3404 | 0.662  | 0.005 | 2.460E-29 |
| 48 | GO:0005746 | mitochondrial respiratory chain                                | 60   | 3.030  | 0.097 | 1.720E-25 |
| 49 | GO:0003676 | nucleic acid binding                                           | 2219 | -1.240 | 0.016 | 6.300E-30 |
| 50 | GO:0007186 | G-protein coupled receptor signaling pathway                   | 393  | 1.270  | 0.017 | 8.620E-29 |

*P*-values were determined by two-sided Wald test.

**Supplementary Table 3. The results from iDEA to detect enriched gene signature on 10x Genomics PBMC scRNA-seq data**

| Rank | Signature           | Project     | Coefficient | Variance | P-value   |
|------|---------------------|-------------|-------------|----------|-----------|
| 1    | CD8+ Tem            | BLUEPRINT   | 1.780       | 0.121    | 2.960E-07 |
| 2    | CD8+ Tem            | NOVERSHTERN | 2.240       | 0.359    | 1.860E-04 |
| 3    | CD4+ memory T-cells | FANTOM      | 0.915       | 0.062    | 2.270E-04 |
| 4    | CD8+ Tem            | NOVERSHTERN | 2.064       | 0.325    | 2.980E-04 |
| 5    | CD4+ memory T-cells | FANTOM      | 0.798       | 0.054    | 5.770E-04 |
| 6    | CD8+ Tcm            | NOVERSHTERN | 2.220       | 0.432    | 7.310E-04 |
| 7    | CD8+ Tem            | NOVERSHTERN | 1.766       | 0.280    | 8.450E-04 |
| 8    | CD8+ T-cells        | HPCA        | 1.618       | 0.236    | 8.710E-04 |
| 9    | CD8+ Tem            | HPCA        | 1.039       | 0.107    | 1.468E-03 |
| 10   | CD8+ Tem            | BLUEPRINT   | 0.934       | 0.087    | 1.574E-03 |
| 11   | NK cells            | HPCA        | 1.558       | 0.250    | 1.827E-03 |
| 12   | CD4+ naive T-cells  | FANTOM      | 1.322       | 0.180    | 1.829E-03 |
| 13   | CD8+ T-cells        | BLUEPRINT   | 1.962       | 0.407    | 2.090E-03 |
| 14   | CD8+ Tcm            | NOVERSHTERN | 1.727       | 0.330    | 2.637E-03 |
| 15   | Basophils           | NOVERSHTERN | 1.765       | 0.356    | 3.082E-03 |
| 16   | CD4+ naive T-cells  | FANTOM      | 1.950       | 0.438    | 3.197E-03 |
| 17   | CD8+ Tcm            | HPCA        | 1.316       | 0.201    | 3.381E-03 |
| 18   | Tgd cells           | HPCA        | 0.983       | 0.113    | 3.493E-03 |
| 19   | CD8+ T-cells        | FANTOM      | 1.805       | 0.385    | 3.620E-03 |
| 20   | CD8+ T-cells        | NOVERSHTERN | 1.800       | 0.385    | 3.734E-03 |
| 21   | CD4+ naive T-cells  | NOVERSHTERN | 1.965       | 0.460    | 3.771E-03 |
| 22   | CD8+ Tem            | HPCA        | 0.924       | 0.118    | 7.164E-03 |
| 23   | CD4+ naive T-cells  | IRIS        | 1.141       | 0.182    | 7.521E-03 |
| 24   | CD8+ T-cells        | FANTOM      | 1.483       | 0.313    | 7.986E-03 |
| 25   | CD8+ T-cells        | BLUEPRINT   | 1.470       | 0.310    | 8.225E-03 |
| 26   | GMP                 | BLUEPRINT   | 0.994       | 0.192    | 2.322E-02 |
| 27   | CLP                 | BLUEPRINT   | 1.191       | 0.279    | 2.414E-02 |
| 28   | NK cells            | BLUEPRINT   | 1.367       | 0.371    | 2.487E-02 |
| 29   | CD4+ Tem            | NOVERSHTERN | 0.965       | 0.214    | 3.713E-02 |
| 30   | Plasma cells        | BLUEPRINT   | -0.390      | 0.036    | 3.849E-02 |
| 31   | CD4+ Tem            | HPCA        | 0.962       | 0.216    | 3.853E-02 |
| 32   | CD4+ Tcm            | NOVERSHTERN | 0.906       | 0.201    | 4.318E-02 |

|    |                    |             |        |       |           |
|----|--------------------|-------------|--------|-------|-----------|
| 33 | CD4+ Tcm           | HPCA        | 0.788  | 0.170 | 5.575E-02 |
| 34 | MPP                | BLUEPRINT   | 0.744  | 0.157 | 6.007E-02 |
| 35 | Tgd cells          | HPCA        | 0.594  | 0.106 | 6.837E-02 |
| 36 | Tgd cells          | HPCA        | 0.629  | 0.121 | 7.110E-02 |
| 37 | B-cells            | NOVERSHTERN | 1.051  | 0.340 | 7.134E-02 |
| 38 | NK cells           | HPCA        | 1.042  | 0.341 | 7.441E-02 |
| 39 | CD8+ naive T-cells | HPCA        | 1.218  | 0.475 | 7.723E-02 |
| 40 | GMP                | BLUEPRINT   | 0.794  | 0.208 | 8.173E-02 |
| 41 | CD8+ naive T-cells | HPCA        | 1.199  | 0.480 | 8.360E-02 |
| 42 | CD4+ naive T-cells | HPCA        | 1.047  | 0.390 | 9.346E-02 |
| 43 | Hepatocytes        | HPCA        | -0.545 | 0.111 | 1.014E-01 |
| 44 | CD8+ naive T-cells | HPCA        | 0.944  | 0.344 | 1.076E-01 |
| 45 | Hepatocytes        | HPCA        | -0.679 | 0.183 | 1.122E-01 |
| 46 | GMP                | BLUEPRINT   | 0.645  | 0.166 | 1.134E-01 |
| 47 | Hepatocytes        | HPCA        | -0.670 | 0.182 | 1.164E-01 |
| 48 | CD4+ Tcm           | HPCA        | 0.785  | 0.266 | 1.281E-01 |
| 49 | CMP                | HPCA        | 0.950  | 0.395 | 1.309E-01 |
| 50 | CD8+ Tcm           | BLUEPRINT   | 0.950  | 0.415 | 1.406E-01 |

*P*-values were determined by two-sided Wald test.

**Supplementary Table 4. The results from fGSEA to detect enriched gene signature on 10x Genomics PBMC scRNA-seq data**

| Rank | Signature            | Project     | P-value   | Adjust p-value |
|------|----------------------|-------------|-----------|----------------|
| 1    | CD4+ memory T-cells  | FANTOM      | 2.490E-04 | 3.987E-03      |
| 2    | CD8+ Tem             | NOVERSHTERN | 2.740E-04 | 3.987E-03      |
| 3    | CD8+ Tem             | NOVERSHTERN | 2.790E-04 | 3.987E-03      |
| 4    | NK cells             | HPCA        | 2.840E-04 | 3.987E-03      |
| 5    | CD8+ Tem             | NOVERSHTERN | 2.870E-04 | 3.987E-03      |
| 6    | NK cells             | HPCA        | 2.870E-04 | 3.987E-03      |
| 7    | NK cells             | HPCA        | 2.970E-04 | 3.987E-03      |
| 8    | CD8+ Tem             | BLUEPRINT   | 3.400E-04 | 3.987E-03      |
| 9    | CD8+ Tem             | HPCA        | 3.550E-04 | 3.987E-03      |
| 10   | Tgd cells            | HPCA        | 3.580E-04 | 3.987E-03      |
| 11   | CD8+ Tem             | HPCA        | 3.600E-04 | 3.987E-03      |
| 12   | Tgd cells            | HPCA        | 3.650E-04 | 3.987E-03      |
| 13   | Tgd cells            | HPCA        | 3.820E-04 | 3.987E-03      |
| 14   | CD8+ Tem             | BLUEPRINT   | 3.880E-04 | 3.987E-03      |
| 15   | CD4+ memory T-cells  | FANTOM      | 5.130E-04 | 4.925E-03      |
| 16   | NK cells             | BLUEPRINT   | 5.470E-04 | 4.925E-03      |
| 17   | CD8+ Tcm             | NOVERSHTERN | 8.210E-04 | 6.953E-03      |
| 18   | MPP                  | BLUEPRINT   | 1.002E-03 | 8.016E-03      |
| 19   | CD8+ Tcm             | HPCA        | 1.225E-03 | 9.285E-03      |
| 20   | CD8+ Tcm             | NOVERSHTERN | 1.420E-03 | 9.320E-03      |
| 21   | MPP                  | FANTOM      | 1.472E-03 | 9.320E-03      |
| 22   | NK cells             | BLUEPRINT   | 1.472E-03 | 9.320E-03      |
| 23   | MPP                  | FANTOM      | 1.489E-03 | 9.320E-03      |
| 24   | CD8+ T-cells         | HPCA        | 6.771E-03 | 4.062E-02      |
| 25   | Mesangial cells      | FANTOM      | 9.177E-03 | 5.286E-02      |
| 26   | Erythrocytes         | NOVERSHTERN | 1.333E-02 | 7.385E-02      |
| 27   | Basophils            | NOVERSHTERN | 1.587E-02 | 8.463E-02      |
| 28   | MPP                  | BLUEPRINT   | 2.187E-02 | 1.124E-01      |
| 29   | Endothelial cells    | BLUEPRINT   | 2.400E-02 | 1.191E-01      |
| 30   | CD4+ Tcm             | HPCA        | 2.602E-02 | 1.249E-01      |
| 31   | mv Endothelial cells | FANTOM      | 2.773E-02 | 1.288E-01      |
| 32   | CD4+ naive T-cells   | NOVERSHTERN | 2.870E-02 | 1.292E-01      |



|    |                     |             |           |           |
|----|---------------------|-------------|-----------|-----------|
| 33 | CD4+ T-cells        | FANTOM      | 3.786E-02 | 1.652E-01 |
| 34 | CD4+ memory T-cells | IRIS        | 4.213E-02 | 1.784E-01 |
| 35 | CMP                 | HPCA        | 5.823E-02 | 2.396E-01 |
| 36 | Platelets           | HPCA        | 7.049E-02 | 2.812E-01 |
| 37 | CD4+ naive T-cells  | IRIS        | 7.615E-02 | 2.812E-01 |
| 38 | CD8+ T-cells        | BLUEPRINT   | 7.718E-02 | 2.812E-01 |
| 39 | CD8+ T-cells        | FANTOM      | 7.718E-02 | 2.812E-01 |
| 40 | CD4+ Tcm            | NOVERSHTERN | 8.359E-02 | 2.812E-01 |
| 41 | Platelets           | HPCA        | 8.469E-02 | 2.812E-01 |
| 42 | Keratinocytes       | FANTOM      | 8.705E-02 | 2.812E-01 |
| 43 | Epithelial cells    | ENCODE      | 9.415E-02 | 2.812E-01 |
| 44 | CD8+ T-cells        | BLUEPRINT   | 9.493E-02 | 2.812E-01 |
| 45 | Epithelial cells    | HPCA        | 9.501E-02 | 2.812E-01 |
| 46 | Keratinocytes       | ENCODE      | 9.501E-02 | 2.812E-01 |
| 47 | Keratinocytes       | HPCA        | 9.501E-02 | 2.812E-01 |
| 48 | Keratinocytes       | HPCA        | 9.501E-02 | 2.812E-01 |
| 49 | Epithelial cells    | HPCA        | 9.598E-02 | 2.812E-01 |
| 50 | Macrophages         | BLUEPRINT   | 9.935E-02 | 2.812E-01 |

*P*-values were determined by Kolmogorov Smirnov test implemented in fGSEA and adjusted by Benjamin & Hochberg method.

**Supplementary Table 5. The results from CAMERA to detect enriched gene signature on 10x Genomics PBMC scRNA-seq data**

| Rank | Signature           | Project     | P-value   | Adjust p-value |
|------|---------------------|-------------|-----------|----------------|
| 1    | CD8+ Tem            | BLUEPRINT   | 5.650E-22 | 8.140E-20      |
| 2    | CD8+ Tem            | HPCA        | 2.270E-13 | 1.640E-11      |
| 3    | Tgd cells           | HPCA        | 6.660E-13 | 3.190E-11      |
| 4    | CD8+ Tem            | HPCA        | 5.270E-12 | 1.900E-10      |
| 5    | NK cells            | HPCA        | 9.870E-12 | 2.840E-10      |
| 6    | CD8+ Tem            | BLUEPRINT   | 2.570E-11 | 6.150E-10      |
| 7    | NK cells            | HPCA        | 2.990E-11 | 6.150E-10      |
| 8    | Tgd cells           | HPCA        | 5.960E-10 | 1.070E-08      |
| 9    | CD8+ Tem            | NOVERSHTERN | 1.610E-07 | 2.500E-06      |
| 10   | NK cells            | HPCA        | 1.740E-07 | 2.500E-06      |
| 11   | CD8+ Tem            | NOVERSHTERN | 2.140E-07 | 2.800E-06      |
| 12   | Tgd cells           | HPCA        | 2.570E-07 | 2.960E-06      |
| 13   | CD8+ Tcm            | NOVERSHTERN | 2.670E-07 | 2.960E-06      |
| 14   | CD8+ Tcm            | HPCA        | 4.330E-07 | 4.450E-06      |
| 15   | CD8+ Tem            | NOVERSHTERN | 9.720E-07 | 9.330E-06      |
| 16   | MPP                 | FANTOM      | 1.280E-06 | 1.150E-05      |
| 17   | Basophils           | NOVERSHTERN | 1.620E-06 | 1.370E-05      |
| 18   | NK cells            | BLUEPRINT   | 1.970E-06 | 1.580E-05      |
| 19   | MPP                 | FANTOM      | 5.800E-06 | 4.400E-05      |
| 20   | CD8+ Tcm            | NOVERSHTERN | 9.700E-06 | 6.980E-05      |
| 21   | CD8+ T-cells        | HPCA        | 8.830E-05 | 6.050E-04      |
| 22   | CD4+ memory T-cells | FANTOM      | 5.620E-04 | 3.581E-03      |
| 23   | NK cells            | BLUEPRINT   | 5.780E-04 | 3.581E-03      |
| 24   | CD4+ memory T-cells | FANTOM      | 5.970E-04 | 3.581E-03      |
| 25   | Mesangial cells     | FANTOM      | 2.573E-03 | 1.482E-02      |
| 26   | CD4+ memory T-cells | IRIS        | 6.846E-03 | 3.792E-02      |
| 27   | Endothelial cells   | BLUEPRINT   | 1.110E-02 | 5.920E-02      |
| 28   | CD8+ T-cells        | BLUEPRINT   | 1.226E-02 | 6.302E-02      |
| 29   | MPP                 | BLUEPRINT   | 1.621E-02 | 8.013E-02      |
| 30   | CD4+ Tcm            | HPCA        | 1.669E-02 | 8.013E-02      |
| 31   | CD4+ naive T-cells  | IRIS        | 2.081E-02 | 9.274E-02      |
| 32   | CD8+ T-cells        | BLUEPRINT   | 2.125E-02 | 9.274E-02      |

|    |                      |             |           |           |
|----|----------------------|-------------|-----------|-----------|
| 33 | CD8+ T-cells         | FANTOM      | 2.125E-02 | 9.274E-02 |
| 34 | Erythrocytes         | NOVERSHTERN | 2.239E-02 | 9.481E-02 |
| 35 | Platelets            | HPCA        | 3.350E-02 | 1.378E-01 |
| 36 | CMP                  | HPCA        | 3.685E-02 | 1.474E-01 |
| 37 | Platelets            | HPCA        | 4.157E-02 | 1.608E-01 |
| 38 | CD4+ T-cells         | FANTOM      | 4.245E-02 | 1.608E-01 |
| 39 | mv Endothelial cells | FANTOM      | 4.355E-02 | 1.608E-01 |
| 40 | MPP                  | BLUEPRINT   | 5.160E-02 | 1.858E-01 |
| 41 | Astrocytes           | FANTOM      | 5.475E-02 | 1.923E-01 |
| 42 | Macrophages          | BLUEPRINT   | 5.656E-02 | 1.939E-01 |
| 43 | CD4+ Tcm             | NOVERSHTERN | 5.890E-02 | 1.973E-01 |
| 44 | Pericytes            | ENCODE      | 7.593E-02 | 2.485E-01 |
| 45 | CD8+ Tcm             | BLUEPRINT   | 1.048E-01 | 3.355E-01 |
| 46 | CLP                  | BLUEPRINT   | 1.229E-01 | 3.846E-01 |
| 47 | Epithelial cells     | HPCA        | 5.002E-02 | 1.596E-01 |
| 48 | Keratinocytes        | ENCODE      | 5.002E-02 | 1.563E-01 |
| 49 | Keratinocytes        | HPCA        | 5.002E-02 | 1.531E-01 |
| 50 | Keratinocytes        | HPCA        | 5.002E-02 | 1.500E-01 |

*P*-values were determined by two-sided t-test implemented in CAMERA and adjusted by Benjamin & Hochberg method.

**Supplementary Table 6. The results from PAGE to detect enriched gene signature on 10x Genomics PBMC scRNA-seq data**

| Rank | Signature           | Project     | Coefficient | P-value   | FDR   |
|------|---------------------|-------------|-------------|-----------|-------|
| 1    | CD8+ Tem            | BLUEPRINT   | 13.915      | 5.140E-44 | 0.000 |
| 2    | CD8+ Tem            | HPCA        | 10.681      | 1.240E-26 | 0.000 |
| 3    | Tgd cells           | HPCA        | 10.443      | 1.580E-25 | 0.000 |
| 4    | CD8+ Tem            | BLUEPRINT   | 9.879       | 5.150E-23 | 0.000 |
| 5    | CD8+ Tem            | HPCA        | 9.571       | 1.060E-21 | 0.000 |
| 6    | Tgd cells           | HPCA        | 9.443       | 3.610E-21 | 0.000 |
| 7    | NK cells            | HPCA        | 9.317       | 1.200E-20 | 0.000 |
| 8    | CD8+ Tem            | NOVERSHTERN | 9.003       | 2.190E-19 | 0.000 |
| 9    | CD8+ Tem            | NOVERSHTERN | 8.922       | 4.580E-19 | 0.000 |
| 10   | CD8+ Tem            | NOVERSHTERN | 8.407       | 4.210E-17 | 0.000 |
| 11   | NK cells            | HPCA        | 8.296       | 1.080E-16 | 0.000 |
| 12   | Tgd cells           | HPCA        | 8.241       | 1.710E-16 | 0.000 |
| 13   | CD8+ Tcm            | NOVERSHTERN | 7.757       | 8.690E-15 | 0.000 |
| 14   | CD8+ Tcm            | HPCA        | 7.508       | 6.020E-14 | 0.000 |
| 15   | NK cells            | BLUEPRINT   | 6.726       | 1.750E-11 | 0.000 |
| 16   | Basophils           | NOVERSHTERN | 6.698       | 2.110E-11 | 0.000 |
| 17   | CD8+ Tcm            | NOVERSHTERN | 6.680       | 2.380E-11 | 0.000 |
| 18   | NK cells            | HPCA        | 6.622       | 3.530E-11 | 0.000 |
| 19   | CD8+ T-cells        | HPCA        | 6.385       | 1.710E-10 | 0.000 |
| 20   | NK cells            | BLUEPRINT   | 5.254       | 1.490E-07 | 0.000 |
| 21   | MPP                 | FANTOM      | 4.911       | 9.070E-07 | 0.000 |
| 22   | MPP                 | FANTOM      | 4.622       | 3.800E-06 | 0.000 |
| 23   | CD4+ memory T-cells | FANTOM      | -3.700      | 2.150E-04 | 0.017 |
| 24   | CD4+ memory T-cells | IRIS        | 3.690       | 2.240E-04 | 0.021 |
| 25   | CD4+ memory T-cells | FANTOM      | -3.660      | 2.520E-04 | 0.020 |
| 26   | CD4+ T-cells        | FANTOM      | -2.990      | 2.793E-03 | 0.050 |
| 27   | CD4+ Tcm            | NOVERSHTERN | -2.960      | 3.077E-03 | 0.052 |
| 28   | CD4+ Tcm            | HPCA        | -2.926      | 3.433E-03 | 0.050 |
| 29   | Erythrocytes        | NOVERSHTERN | 2.849       | 4.392E-03 | 0.048 |
| 30   | CD8+ Tcm            | BLUEPRINT   | 2.748       | 5.995E-03 | 0.047 |
| 31   | Endothelial cells   | BLUEPRINT   | 2.608       | 9.098E-03 | 0.048 |
| 32   | CD8+ T-cells        | BLUEPRINT   | 2.534       | 1.129E-02 | 0.069 |

|    |                      |             |        |           |       |
|----|----------------------|-------------|--------|-----------|-------|
| 33 | Platelets            | HPCA        | 2.503  | 1.233E-02 | 0.082 |
| 34 | CD4+ naive T-cells   | NOVERSHTERN | -2.442 | 1.461E-02 | 0.082 |
| 35 | MPP                  | BLUEPRINT   | -2.434 | 1.492E-02 | 0.080 |
| 36 | CMP                  | HPCA        | 2.325  | 2.005E-02 | 0.100 |
| 37 | Mesangial cells      | FANTOM      | 2.319  | 2.038E-02 | 0.100 |
| 38 | CD8+ T-cells         | BLUEPRINT   | 2.312  | 2.078E-02 | 0.103 |
| 39 | CD8+ T-cells         | FANTOM      | 2.312  | 2.078E-02 | 0.100 |
| 40 | Platelets            | HPCA        | 2.310  | 2.090E-02 | 0.098 |
| 41 | CD4+ naive T-cells   | IRIS        | -2.242 | 2.497E-02 | 0.105 |
| 42 | CD4+ Tem             | HPCA        | -2.221 | 2.636E-02 | 0.107 |
| 43 | CD4+ naive T-cells   | HPCA        | -2.122 | 3.385E-02 | 0.116 |
| 44 | Macrophages          | BLUEPRINT   | 2.043  | 4.101E-02 | 0.139 |
| 45 | Keratinocytes        | FANTOM      | -1.966 | 4.935E-02 | 0.164 |
| 46 | mv Endothelial cells | FANTOM      | 1.963  | 4.966E-02 | 0.161 |
| 47 | Epithelial cells     | HPCA        | -1.960 | 5.002E-02 | 0.160 |
| 48 | Keratinocytes        | ENCODE      | -1.960 | 5.002E-02 | 0.156 |
| 49 | Keratinocytes        | HPCA        | -1.960 | 5.002E-02 | 0.153 |
| 50 | Keratinocytes        | HPCA        | -1.960 | 5.002E-02 | 0.150 |

*P*-values were determined by two-sided t-test implemented in CAMERA.

**Supplementary Table 7. The results from GSEA to detect enriched gene signature on 10x Genomics PBMC scRNA-seq data**

| Rank | Signature            | Project     | Coefficient | P-value   | FDR   |
|------|----------------------|-------------|-------------|-----------|-------|
| 1    | CD4+ MEMORY T-Cells  | FANTOM      | -0.614      | 0.000E+00 | 0.036 |
| 2    | CD4+ MEMORY T-Cells  | FANTOM      | -0.622      | 0.000E+00 | 0.026 |
| 3    | CD8+ T-Cells         | HPCA        | 0.752       | 0.000E+00 | 0.023 |
| 4    | CD8+ TCM             | HPCA        | 0.762       | 0.000E+00 | 0.006 |
| 5    | CD8+ TCM             | NOVERSHTERN | 0.822       | 0.000E+00 | 0.007 |
| 6    | CD8+ TEM             | BLUEPRINT   | 0.766       | 0.000E+00 | 0.000 |
| 7    | CD8+ TEM             | BLUEPRINT   | 0.894       | 0.000E+00 | 0.000 |
| 8    | CD8+ TEM             | HPCA        | 0.803       | 0.000E+00 | 0.000 |
| 9    | CD8+ TEM             | HPCA        | 0.816       | 0.000E+00 | 0.000 |
| 10   | CD8+ TEM             | NOVERSHTERN | 0.922       | 0.000E+00 | 0.000 |
| 11   | CD8+ TEM             | NOVERSHTERN | 0.895       | 0.000E+00 | 0.001 |
| 12   | MPP                  | FANTOM      | 0.781       | 0.000E+00 | 0.002 |
| 13   | NK Cells             | BLUEPRINT   | 0.892       | 0.000E+00 | 0.001 |
| 14   | NK Cells             | HPCA        | 0.884       | 0.000E+00 | 0.000 |
| 15   | NK Cells             | HPCA        | 0.920       | 0.000E+00 | 0.000 |
| 16   | NK Cells             | HPCA        | 0.863       | 0.000E+00 | 0.001 |
| 17   | TGD Cells            | HPCA        | 0.816       | 0.000E+00 | 0.000 |
| 18   | TGD Cells            | HPCA        | 0.762       | 0.000E+00 | 0.000 |
| 19   | TGD Cells            | HPCA        | 0.770       | 0.000E+00 | 0.000 |
| 20   | MPP                  | BLUEPRINT   | -0.698      | 1.422E-03 | 0.032 |
| 21   | CD8+ TCM             | NOVERSHTERN | 0.870       | 2.513E-03 | 0.006 |
| 22   | CD8+ TEM             | NOVERSHTERN | 0.876       | 2.740E-03 | 0.001 |
| 23   | MPP                  | FANTOM      | 0.799       | 2.890E-03 | 0.006 |
| 24   | NK Cells             | BLUEPRINT   | 0.798       | 5.814E-03 | 0.004 |
| 25   | MESANGIAL Cells      | FANTOM      | 0.756       | 8.671E-03 | 0.030 |
| 26   | BASOPHILS            | NOVERSHTERN | 0.788       | 1.405E-02 | 0.045 |
| 27   | ERYTHROCYTES         | NOVERSHTERN | 0.808       | 2.057E-02 | 0.034 |
| 28   | CD4+ NAIVE T-Cells   | NOVERSHTERN | -0.719      | 2.473E-02 | 0.252 |
| 29   | CD4+ TCM             | HPCA        | -0.621      | 2.493E-02 | 0.377 |
| 30   | MPP                  | BLUEPRINT   | -0.653      | 2.546E-02 | 0.304 |
| 31   | ENDOTHELIAL Cells    | BLUEPRINT   | 0.644       | 2.589E-02 | 0.089 |
| 32   | MV ENDOTHELIAL Cells | FANTOM      | 0.633       | 3.715E-02 | 0.077 |

|    |                     |             |        |           |       |
|----|---------------------|-------------|--------|-----------|-------|
| 33 | CD4+ MEMORY T-Cells | IRIS        | 0.753  | 4.040E-02 | 0.073 |
| 34 | CMP                 | HPCA        | 0.687  | 5.177E-02 | 0.109 |
| 35 | CD4+ T-Cells        | FANTOM      | -0.645 | 5.247E-02 | 0.450 |
| 36 | CD8+ T-Cells        | FANTOM      | 0.662  | 6.128E-02 | 0.134 |
| 37 | PLATELETS           | HPCA        | 0.487  | 6.338E-02 | 0.234 |
| 38 | PLATELETS           | HPCA        | 0.517  | 6.507E-02 | 0.207 |
| 39 | CD4+ NAIVE T-Cells  | IRIS        | -0.599 | 6.947E-02 | 0.528 |
| 40 | KERATINOCYTES       | FANTOM      | -0.583 | 6.987E-02 | 0.566 |
| 41 | CD8+ T-Cells        | BLUEPRINT   | 0.662  | 7.003E-02 | 0.143 |
| 42 | KERATINOCYTES       | HPCA        | -0.602 | 7.133E-02 | 0.582 |
| 43 | EPITHELIAL Cells    | ENCODE      | -0.578 | 8.124E-02 | 0.422 |
| 44 | EPITHELIAL Cells    | HPCA        | -0.583 | 8.272E-02 | 0.394 |
| 45 | EPITHELIAL Cells    | HPCA        | -0.602 | 8.396E-02 | 0.468 |
| 46 | PERICYTES           | ENCODE      | 0.604  | 8.447E-02 | 0.181 |
| 47 | KERATINOCYTES       | ENCODE      | -0.602 | 8.465E-02 | 0.375 |
| 48 | MACROPHAGES         | BLUEPRINT   | 0.488  | 8.834E-02 | 0.272 |
| 49 | KERATINOCYTES       | HPCA        | -0.602 | 8.951E-02 | 0.508 |
| 50 | CD4+ TCM            | NOVERSHTERN | -0.594 | 9.222E-02 | 0.353 |

*P*-values were determined by Kolmogorov Smirnov test implemented in GSEA.

**Supplementary Table 8. The results from iDEA to detect top 50 enriched gene sets among human gene sets on 10x Genomics PBMC scRNA-seq data**

| Rank | Gene Set                                                             | Count | Coefficient | Variance | P-value   |
|------|----------------------------------------------------------------------|-------|-------------|----------|-----------|
| 1    | REACTOME_METABOLISM_OF_PROTEINS                                      | 144   | 3.018       | 0.041    | 5.864E-46 |
| 2    | GO_AMIDE_BIOSYNTHETIC_PROCESS                                        | 158   | 2.603       | 0.034    | 5.939E-41 |
| 3    | GO_ORGANIC_CYCLIC_COMPOUND_CATABOLIC_PROCESS                         | 128   | 2.877       | 0.043    | 2.905E-39 |
| 4    | HSIAO_HOUSEKEEPING_GENES                                             | 268   | 2.120       | 0.023    | 3.706E-39 |
| 5    | GO_PROTEIN_TARGETING                                                 | 140   | 2.675       | 0.038    | 4.529E-39 |
| 6    | GO_VIRAL_LIFE_CYCLE                                                  | 115   | 3.192       | 0.053    | 9.420E-39 |
| 7    | GO_ESTABLISHMENT_OF_PROTEIN_LOCALIZATION_TO_ORGANELLES               | 130   | 2.821       | 0.042    | 1.196E-38 |
| 8    | GO_RIBOSOME                                                          | 116   | 3.045       | 0.050    | 1.742E-38 |
| 9    | REACTOME_TRANSLATION                                                 | 112   | 3.777       | 0.073    | 2.300E-38 |
| 10   | REACTOME_METABOLISM_OF_MRNA                                          | 125   | 2.845       | 0.044    | 2.377E-38 |
| 11   | REACTOME_METABOLISM_OF_RNA                                           | 132   | 2.708       | 0.040    | 7.892E-38 |
| 12   | GO_RNA_CATABOLIC_PROCESS                                             | 109   | 3.343       | 0.060    | 9.977E-38 |
| 13   | GO_PROTEIN_LOCALIZATION_TO_MEMBRANE                                  | 130   | 2.751       | 0.041    | 1.551E-37 |
| 14   | GO_RIBONUCLEOPROTEIN_COMPLEX_BIOGENESIS                              | 147   | 2.512       | 0.035    | 2.951E-37 |
| 15   | GO_ESTABLISHMENT_OF_PROTEIN_LOCALIZATION_TO_MEMBRANE                 | 115   | 3.070       | 0.051    | 3.167E-37 |
| 16   | GO_RIBOSOME_BIOGENESIS                                               | 111   | 3.069       | 0.053    | 4.482E-37 |
| 17   | GO_STRUCTURAL_CONSTITUENT_OF_RIBOSOME                                | 107   | 3.225       | 0.058    | 9.835E-37 |
| 18   | GO_NCRNA_PROCESSING                                                  | 114   | 2.924       | 0.049    | 1.975E-36 |
| 19   | GSE2405_0H_VS_24H_A_PHAGOCYTOPHILUM_STIM_NEUTROPHIL_UP               | 142   | 2.587       | 0.037    | 2.119E-36 |
| 20   | GO_RIBOSOMAL_SUBUNIT                                                 | 103   | 3.479       | 0.068    | 5.253E-36 |
| 21   | GO_RRNA_METABOLIC_PROCESS                                            | 103   | 3.342       | 0.064    | 1.752E-35 |
| 22   | GO_NCRNA_METABOLIC_PROCESS                                           | 129   | 2.569       | 0.040    | 3.883E-35 |
| 23   | GO_CYTOSOLIC_PART                                                    | 101   | 3.590       | 0.074    | 5.188E-35 |
| 24   | GO_TRANSLATIONAL_INITIATION                                          | 104   | 3.933       | 0.087    | 9.055E-35 |
| 25   | GSE2405_0H_VS_9H_A_PHAGOCYTOPHILUM_STIM_NEUTROPHIL_DN                | 142   | 2.450       | 0.036    | 4.128E-34 |
| 26   | GO_PROTEIN_TARGETING_TO_MEMBRANE                                     | 97    | 3.780       | 0.086    | 8.355E-33 |
| 27   | GO_PROTEIN_LOCALIZATION_TO_ENDOPLASMIC_RETICULUM                     | 97    | 3.855       | 0.090    | 4.666E-32 |
| 28   | GSE41978_ID2_KO_VS_ID2_KO_AND_BIM_KO_KLRG1_LOW_EFFECTOR_CD8_TCELL_DN | 109   | 2.706       | 0.048    | 3.589E-30 |
| 29   | REACTOME_SRP_DEPENDENT_COTRANSLATIONAL_PROTEIN_TARGETING_TO_MEMBRANE | 93    | 4.104       | 0.111    | 1.267E-29 |
| 30   | GSE42088_UNINF_VS_LEISHMANIA_INF_DC_2H_DN                            | 106   | 2.613       | 0.048    | 5.764E-29 |



|    |                                                                       |     |       |       |           |
|----|-----------------------------------------------------------------------|-----|-------|-------|-----------|
| 31 | GSE42088_UNINF_VS_LEISHMANIA_INF_DC_4H_DN                             | 104 | 2.481 | 0.048 | 3.176E-27 |
| 32 | GSE41978_KLRG1_HIGH_VS_LOW_EFFECTOR_CD8_TCELL_DN                      | 86  | 2.750 | 0.061 | 1.203E-25 |
| 33 | GSE22886_NAIVE_BCELL_VS_NEUTROPHIL_UP                                 | 85  | 2.619 | 0.059 | 6.206E-25 |
| 34 | GO_CELL_SUBSTRATE_JUNCTION                                            | 114 | 2.229 | 0.042 | 6.560E-24 |
| 35 | GSE22886_NAIVE_TCELL_VS_DC_UP                                         | 103 | 2.279 | 0.046 | 9.367E-24 |
| 36 | GO_ANCHORING_JUNCTION                                                 | 119 | 2.153 | 0.040 | 1.613E-23 |
| 37 | PECE_MAMMARY_STEM_CELL_UP                                             | 74  | 2.696 | 0.069 | 4.049E-22 |
| 38 | GO_ESTABLISHMENT_OF_PROTEIN_LOCALIZATION_TO_ENDOPLASMIC_RETICULUM     | 88  | 4.633 | 0.177 | 5.995E-22 |
| 39 | OSMAN_BLADDER_CANCER_DN                                               | 125 | 1.925 | 0.038 | 3.596E-21 |
| 40 | GO_LARGE_RIBOSOMAL_SUBUNIT                                            | 61  | 3.320 | 0.111 | 7.696E-21 |
| 41 | JISON_SICKLE_CELL_DISEASE_DN                                          | 80  | 2.351 | 0.059 | 3.695E-20 |
| 42 | GSE34205_HEALTHY_VS_FLU_INF_INFANT_PBMC_UP                            | 70  | 2.405 | 0.067 | 6.569E-19 |
| 43 | TIEN_INTESTINE_PROBIOTICS_24HR_DN                                     | 76  | 2.252 | 0.061 | 1.092E-17 |
| 44 | GSE3720_UNSTIM_VS_PMA_STIM_VD2_GAMMADELTA_TCELL_UP                    | 73  | 2.226 | 0.062 | 1.620E-17 |
| 45 | GSE26156_DOUBLE_POSITIVE_VS_CD4_SINGLE_POSITIVE_THYMOCYTE_UP          | 79  | 2.099 | 0.057 | 7.262E-17 |
| 46 | GSE14000_TRANSLATED_RNA_VS_MRNA_DC_DN                                 | 80  | 2.044 | 0.056 | 1.214E-16 |
| 47 | GSE21927_SPLEEN_C57BL6_VS_4T1_TUMOR_BALBC_MONOCYTES_UP                | 77  | 2.149 | 0.059 | 1.407E-16 |
| 48 | GSE3720_UNSTIM_VS_LPS_STIM_VD2_GAMMADELTA_TCELL_UP                    | 62  | 2.320 | 0.074 | 4.046E-16 |
| 49 | REACTOME_3_UTR_MEDIATED_TRANSLATIONAL_REGULATION                      | 91  | 5.580 | 0.381 | 1.294E-15 |
| 50 | GO_NUCLEAR_TRANSCRIBED_MRNA_CATABOLIC_PROCESS_NONSENSE_MEDIATED_DECAY | 86  | 5.305 | 0.319 | 1.338E-14 |

*P*-values were determined by two-sided Wald test.

**Supplementary Table 9. Computation time (minutes) for each GSE method on three real scRNA-seq datasets**

| Method | Computation Time           |                             |                                   |
|--------|----------------------------|-----------------------------|-----------------------------------|
|        | Human<br>(n=15280,m=12033) | Mouse<br>(n=13598, m =2851) | 10x Genomics<br>(n=13713, m =144) |
| iDEA   | 21057                      | 3991                        | 24                                |
| fGSEA  | 0.38                       | 0.07                        | 0.01                              |
| CAMERA | 0.004                      | 0.001                       | 0.0002                            |
| PAGE   | 1.1                        | 0.25                        | 0.13                              |
| GSEA   | 47.4                       | 67.1                        | 0.5                               |

Computation was performed on a single core of an Intel Xeon L5420 2.50 GHz processor. n is number of genes analyzed in the dataset; m is number of gene sets.

**Supplementary Table 10. Results for the top first gene set GO:0001944 (vasculature development) with the combinations of the top 50 gene sets in human embryonic stem cell scRNA-seq dataset**

|    | <i>P</i> -value | Adjusted <i>p</i> -value | Set          | Count | Set2                                            |
|----|-----------------|--------------------------|--------------|-------|-------------------------------------------------|
| 1  | 5.456E-17       | 1.970E-13                | intersection | 332   | GO_BLOOD_VESSEL_MORPHOGENESIS                   |
| 2  | 1.132E-02       | 1.000E+00                | set1         | 97    | GO_BLOOD_VESSEL_MORPHOGENESIS                   |
| 3  | NA              | NA                       | set2         | 0     | GO_BLOOD_VESSEL_MORPHOGENESIS                   |
| 4  | 3.397E-04       | 1.000E+00                | intersection | 49    | SCHUETZ_BREAST_CANCER_DUCTAL_INVASIVE_UP        |
| 5  | 2.937E-15       | 1.060E-11                | set1         | 380   | SCHUETZ_BREAST_CANCER_DUCTAL_INVASIVE_UP        |
| 6  | 8.564E-20       | 3.092E-16                | set2         | 261   | SCHUETZ_BREAST_CANCER_DUCTAL_INVASIVE_UP        |
| 7  | 1.327E-15       | 4.793E-12                | intersection | 268   | GO_ANGIOGENESIS                                 |
| 8  | 1.031E-03       | 1.000E+00                | set1         | 161   | GO_ANGIOGENESIS                                 |
| 9  | NA              | NA                       | set2         | 0     | GO_ANGIOGENESIS                                 |
| 10 | 2.819E-04       | 1.000E+00                | intersection | 41    | LIU_PROSTATE_CANCER_DN                          |
| 11 | 1.816E-14       | 6.557E-11                | set1         | 388   | LIU_PROSTATE_CANCER_DN                          |
| 12 | 9.917E-17       | 3.581E-13                | set2         | 383   | LIU_PROSTATE_CANCER_DN                          |
| 13 | 4.875E-06       | 1.760E-02                | intersection | 57    | SWEET_LUNG_CANCER_KRAS_DN                       |
| 14 | 1.097E-12       | 3.960E-09                | set1         | 372   | SWEET_LUNG_CANCER_KRAS_DN                       |
| 15 | 4.693E-14       | 1.695E-10                | set2         | 320   | SWEET_LUNG_CANCER_KRAS_DN                       |
| 16 | 8.046E-03       | 1.000E+00                | intersection | 26    | ONDER_CDH1_TARGETS_2_DN                         |
| 17 | 1.916E-16       | 6.920E-13                | set1         | 403   | ONDER_CDH1_TARGETS_2_DN                         |
| 18 | 5.558E-19       | 2.007E-15                | set2         | 358   | ONDER_CDH1_TARGETS_2_DN                         |
| 19 | 8.242E-03       | 1.000E+00                | intersection | 23    | SMID_BREAST_CANCER_NORMAL_LIKE_UP               |
| 20 | 3.566E-16       | 1.288E-12                | set1         | 406   | SMID_BREAST_CANCER_NORMAL_LIKE_UP               |
| 21 | 5.281E-19       | 1.907E-15                | set2         | 338   | SMID_BREAST_CANCER_NORMAL_LIKE_UP               |
| 22 | 1.746E-05       | 6.305E-02                | intersection | 64    | GO_SINGLE_ORGANISM_CELL_ADHESION                |
| 23 | 1.134E-13       | 4.096E-10                | set1         | 365   | GO_SINGLE_ORGANISM_CELL_ADHESION                |
| 24 | 5.507E-14       | 1.989E-10                | set2         | 306   | GO_SINGLE_ORGANISM_CELL_ADHESION                |
| 25 | 1.982E-04       | 7.158E-01                | intersection | 49    | GO_ANCHORING_JUNCTION                           |
| 26 | 2.914E-14       | 1.052E-10                | set1         | 380   | GO_ANCHORING_JUNCTION                           |
| 27 | 1.095E-13       | 3.953E-10                | set2         | 419   | GO_ANCHORING_JUNCTION                           |
| 28 | 2.173E-05       | 7.847E-02                | intersection | 63    | LIM_MAMMARY_STEM_CELL_UP                        |
| 29 | 1.648E-13       | 5.950E-10                | set1         | 366   | LIM_MAMMARY_STEM_CELL_UP                        |
| 30 | 2.416E-13       | 8.723E-10                | set2         | 380   | LIM_MAMMARY_STEM_CELL_UP                        |
| 31 | 7.076E-04       | 1.000E+00                | intersection | 38    | PASINI_SUZ12_TARGETS_DN                         |
| 32 | 3.246E-15       | 1.172E-11                | set1         | 391   | PASINI_SUZ12_TARGETS_DN                         |
| 33 | 2.121E-14       | 7.658E-11                | set2         | 267   | PASINI_SUZ12_TARGETS_DN                         |
| 34 | 7.560E-02       | 1.000E+00                | intersection | 28    | BOQUEST_STEM_CELL_DN                            |
| 35 | 4.837E-14       | 1.747E-10                | set1         | 401   | BOQUEST_STEM_CELL_DN                            |
| 36 | 2.507E-14       | 9.053E-11                | set2         | 173   | BOQUEST_STEM_CELL_DN                            |
| 37 | 3.372E-04       | 1.000E+00                | intersection | 39    | CHARAFE_BREAST_CANCER_LUMINAL_VS_MESENCHYMAL_DN |

|    |           |           |              |     |                                                 |
|----|-----------|-----------|--------------|-----|-------------------------------------------------|
| 38 | 2.993E-15 | 1.081E-11 | set1         | 390 | CHARAFE_BREAST_CANCER_LUMINAL_VS_MESENCHYMAL_DN |
| 39 | 2.370E-14 | 8.558E-11 | set2         | 403 | CHARAFE_BREAST_CANCER_LUMINAL_VS_MESENCHYMAL_DN |
| 40 | 9.378E-02 | 1.000E+00 | intersection | 15  | BENPORATH_ES_1                                  |
| 41 | 2.749E-16 | 9.927E-13 | set1         | 414 | BENPORATH_ES_1                                  |
| 42 | 1.405E-14 | 5.074E-11 | set2         | 357 | BENPORATH_ES_1                                  |
| 43 | 7.779E-05 | 2.809E-01 | intersection | 45  | GO_REGULATION_OF_SYSTEM_PROCESS                 |
| 44 | 1.130E-13 | 4.081E-10 | set1         | 384 | GO_REGULATION_OF_SYSTEM_PROCESS                 |
| 45 | 4.550E-12 | 1.643E-08 | set2         | 345 | GO_REGULATION_OF_SYSTEM_PROCESS                 |
| 46 | 3.187E-03 | 1.000E+00 | intersection | 29  | GO_APICAL_PART_OF_CELL                          |
| 47 | 9.338E-16 | 3.372E-12 | set1         | 400 | GO_APICAL_PART_OF_CELL                          |
| 48 | 9.476E-15 | 3.422E-11 | set2         | 252 | GO_APICAL_PART_OF_CELL                          |
| 49 | 1.751E-03 | 1.000E+00 | intersection | 52  | GO_EXTRACELLULAR_MATRIX                         |
| 50 | 9.809E-16 | 3.542E-12 | set1         | 377 | GO_EXTRACELLULAR_MATRIX                         |
| 51 | 6.689E-15 | 2.415E-11 | set2         | 274 | GO_EXTRACELLULAR_MATRIX                         |
| 52 | 4.220E-03 | 1.000E+00 | intersection | 32  | GO_CELL_CELL_JUNCTION                           |
| 53 | 1.702E-14 | 6.147E-11 | set1         | 397 | GO_CELL_CELL_JUNCTION                           |
| 54 | 3.221E-12 | 1.163E-08 | set2         | 303 | GO_CELL_CELL_JUNCTION                           |
| 55 | 1.898E-03 | 1.000E+00 | intersection | 39  | DELYS_THYROID_CANCER_UP                         |
| 56 | 6.755E-16 | 2.439E-12 | set1         | 390 | DELYS_THYROID_CANCER_UP                         |
| 57 | 3.937E-15 | 1.422E-11 | set2         | 340 | DELYS_THYROID_CANCER_UP                         |
| 58 | 2.988E-06 | 1.079E-02 | intersection | 68  | GO_WOUND_HEALING                                |
| 59 | 9.462E-13 | 3.417E-09 | set1         | 361 | GO_WOUND_HEALING                                |
| 60 | 7.381E-10 | 2.665E-06 | set2         | 325 | GO_WOUND_HEALING                                |
| 61 | 3.173E-02 | 1.000E+00 | intersection | 28  | RODWELL_AGING_KIDNEY_UP                         |
| 62 | 3.612E-17 | 1.304E-13 | set1         | 401 | RODWELL_AGING_KIDNEY_UP                         |
| 63 | 1.729E-15 | 6.245E-12 | set2         | 390 | RODWELL_AGING_KIDNEY_UP                         |
| 64 | 7.056E-03 | 1.000E+00 | intersection | 36  | CHARAFE_BREAST_CANCER_LUMINAL_VS_BASAL_DN       |
| 65 | 2.316E-16 | 8.364E-13 | set1         | 393 | CHARAFE_BREAST_CANCER_LUMINAL_VS_BASAL_DN       |
| 66 | 1.085E-14 | 3.919E-11 | set2         | 366 | CHARAFE_BREAST_CANCER_LUMINAL_VS_BASAL_DN       |
| 67 | 6.431E-09 | 2.322E-05 | intersection | 103 | GO_REGULATION_OF_VASCULATURE_DEVELOPMENT        |
| 68 | 1.376E-10 | 4.971E-07 | set1         | 326 | GO_REGULATION_OF_VASCULATURE_DEVELOPMENT        |
| 69 | 1.051E-05 | 3.795E-02 | set2         | 97  | GO_REGULATION_OF_VASCULATURE_DEVELOPMENT        |
| 70 | 2.385E-04 | 8.613E-01 | intersection | 39  | SMID_BREAST_CANCER_LUMINAL_B_DN                 |
| 71 | 1.214E-14 | 4.385E-11 | set1         | 390 | SMID_BREAST_CANCER_LUMINAL_B_DN                 |
| 72 | 4.096E-12 | 1.479E-08 | set2         | 389 | SMID_BREAST_CANCER_LUMINAL_B_DN                 |
| 73 | 1.321E-01 | 1.000E+00 | intersection | 8   | SABATES_COLORECTAL_ADENOMA_DN                   |
| 74 | 2.425E-17 | 8.757E-14 | set1         | 421 | SABATES_COLORECTAL_ADENOMA_DN                   |
| 75 | 9.821E-16 | 3.546E-12 | set2         | 190 | SABATES_COLORECTAL_ADENOMA_DN                   |
| 76 | 6.503E-05 | 2.348E-01 | intersection | 40  | GO_LEUKOCYTE_MIGRATION                          |
| 77 | 9.305E-14 | 3.360E-10 | set1         | 389 | GO_LEUKOCYTE_MIGRATION                          |
| 78 | 8.733E-11 | 3.153E-07 | set2         | 151 | GO_LEUKOCYTE_MIGRATION                          |
| 79 | 7.538E-04 | 1.000E+00 | intersection | 36  | LINDGREN_BLADDER_CANCER_CLUSTER_2B              |

|     |           |           |              |     |                                                       |
|-----|-----------|-----------|--------------|-----|-------------------------------------------------------|
| 80  | 3.720E-15 | 1.343E-11 | set1         | 393 | LINDGREN_BLADDER_CANCER_CLUSTER_2B                    |
| 81  | 1.359E-11 | 4.907E-08 | set2         | 317 | LINDGREN_BLADDER_CANCER_CLUSTER_2B                    |
| 82  | 2.772E-05 | 1.001E-01 | intersection | 68  | GO_TAXIS                                              |
| 83  | 7.298E-14 | 2.635E-10 | set1         | 361 | GO_TAXIS                                              |
| 84  | 3.585E-10 | 1.294E-06 | set2         | 298 | GO_TAXIS                                              |
| 85  | 7.764E-07 | 2.804E-03 | intersection | 73  | GO_POSITIVE_REGULATION_OF_MAPK_CASCADE                |
| 86  | 3.479E-12 | 1.256E-08 | set1         | 356 | GO_POSITIVE_REGULATION_OF_MAPK_CASCADE                |
| 87  | 3.825E-08 | 1.381E-04 | set2         | 320 | GO_POSITIVE_REGULATION_OF_MAPK_CASCADE                |
| 88  | 1.614E-02 | 1.000E+00 | intersection | 18  | CREIGHTON_ENDOCRINE_THERAPY_RESISTANCE_5              |
| 89  | 1.110E-15 | 4.007E-12 | set1         | 411 | CREIGHTON_ENDOCRINE_THERAPY_RESISTANCE_5              |
| 90  | 2.149E-12 | 7.758E-09 | set2         | 413 | CREIGHTON_ENDOCRINE_THERAPY_RESISTANCE_5              |
| 91  | 1.277E-04 | 4.611E-01 | intersection | 51  | GO_REGULATION_OF_BODY_FLUID_LEVELS                    |
| 92  | 1.104E-12 | 3.986E-09 | set1         | 378 | GO_REGULATION_OF_BODY_FLUID_LEVELS                    |
| 93  | 7.002E-09 | 2.528E-05 | set2         | 359 | GO_REGULATION_OF_BODY_FLUID_LEVELS                    |
| 94  | 1.332E-03 | 1.000E+00 | intersection | 49  | GO_REGULATION_OF_NEURON_PROJECTION_DEVELOPMENT        |
| 95  | 1.639E-15 | 5.917E-12 | set1         | 380 | GO_REGULATION_OF_NEURON_PROJECTION_DEVELOPMENT        |
| 96  | 1.633E-11 | 5.896E-08 | set2         | 315 | GO_REGULATION_OF_NEURON_PROJECTION_DEVELOPMENT        |
| 97  | 3.274E-03 | 1.000E+00 | intersection | 37  | DUTERTRE ESTRADIOL_RESPONSE_24HR_DN                   |
| 98  | 7.166E-16 | 2.588E-12 | set1         | 392 | DUTERTRE ESTRADIOL_RESPONSE_24HR_DN                   |
| 99  | 1.579E-12 | 5.703E-09 | set2         | 450 | DUTERTRE ESTRADIOL_RESPONSE_24HR_DN                   |
| 100 | 1.335E-03 | 1.000E+00 | intersection | 30  | GO_MEMBRANE_MICRODOMAIN                               |
| 101 | 1.734E-14 | 6.261E-11 | set1         | 399 | GO_MEMBRANE_MICRODOMAIN                               |
| 102 | 5.558E-10 | 2.007E-06 | set2         | 229 | GO_MEMBRANE_MICRODOMAIN                               |
| 103 | 6.314E-03 | 1.000E+00 | intersection | 17  | GSE2405_0H_VS_3H_A_PHAGOCYTOPHILUM_STIM_NEUTROPHIL_UP |
| 104 | 2.400E-16 | 8.665E-13 | set1         | 412 | GSE2405_0H_VS_3H_A_PHAGOCYTOPHILUM_STIM_NEUTROPHIL_UP |
| 105 | 3.248E-13 | 1.173E-09 | set2         | 161 | GSE2405_0H_VS_3H_A_PHAGOCYTOPHILUM_STIM_NEUTROPHIL_UP |
| 106 | 6.100E-02 | 1.000E+00 | intersection | 11  | WANG_RESPONSE_TO_GSK3_INHIBITOR_SB216763_DN           |
| 107 | 3.474E-17 | 1.255E-13 | set1         | 418 | WANG_RESPONSE_TO_GSK3_INHIBITOR_SB216763_DN           |
| 108 | 3.274E-12 | 1.182E-08 | set2         | 329 | WANG_RESPONSE_TO_GSK3_INHIBITOR_SB216763_DN           |
| 109 | 2.077E-03 | 1.000E+00 | intersection | 37  | GO_CELL_SUBSTRATE_JUNCTION                            |
| 110 | 8.636E-16 | 3.118E-12 | set1         | 392 | GO_CELL_SUBSTRATE_JUNCTION                            |
| 111 | 4.238E-11 | 1.530E-07 | set2         | 348 | GO_CELL_SUBSTRATE_JUNCTION                            |
| 112 | 6.744E-02 | 1.000E+00 | intersection | 30  | GO_CELL_LEADING_EDGE                                  |
| 113 | 2.993E-17 | 1.081E-13 | set1         | 399 | GO_CELL_LEADING_EDGE                                  |
| 114 | 5.629E-13 | 2.033E-09 | set2         | 293 | GO_CELL_LEADING_EDGE                                  |
| 115 | 1.849E-04 | 6.677E-01 | intersection | 45  | REACTOME_HEMOSTASIS                                   |
| 116 | 3.583E-13 | 1.294E-09 | set1         | 384 | REACTOME_HEMOSTASIS                                   |
| 117 | 3.356E-08 | 1.212E-04 | set2         | 341 | REACTOME_HEMOSTASIS                                   |
| 118 | 9.548E-05 | 3.448E-01 | intersection | 48  | GO_NEGATIVE_REGULATION_OF_LOCOMOTION                  |
| 119 | 6.438E-14 | 2.325E-10 | set1         | 381 | GO_NEGATIVE_REGULATION_OF_LOCOMOTION                  |

|     |           |           |              |     |                                                                 |
|-----|-----------|-----------|--------------|-----|-----------------------------------------------------------------|
| 120 | 1.304E-07 | 4.708E-04 | set2         | 179 | GO_NEGATIVE_REGULATION_OF_LOCOMOTION                            |
| 121 | 9.589E-03 | 1.000E+00 | intersection | 28  | GO_ACTIN_FILAMENT_BASED_PROCESS                                 |
| 122 | 1.619E-16 | 5.845E-13 | set1         | 401 | GO_ACTIN_FILAMENT_BASED_PROCESS                                 |
| 123 | 3.258E-12 | 1.177E-08 | set2         | 380 | GO_ACTIN_FILAMENT_BASED_PROCESS                                 |
| 124 | 1.755E-03 | 1.000E+00 | intersection | 29  | SCHAEFFER_PROSTATE_DEVELOPMENT_48HR_UP                          |
| 125 | 8.673E-16 | 3.132E-12 | set1         | 400 | SCHAEFFER_PROSTATE_DEVELOPMENT_48HR_UP                          |
| 126 | 2.443E-11 | 8.820E-08 | set2         | 396 | SCHAEFFER_PROSTATE_DEVELOPMENT_48HR_UP                          |
| 127 | 1.955E-04 | 7.059E-01 | intersection | 57  | GO_POSITIVE_REGULATION_OF_CELL_DEVELOPMENT                      |
| 128 | 8.814E-15 | 3.183E-11 | set1         | 372 | GO_POSITIVE_REGULATION_OF_CELL_DEVELOPMENT                      |
| 129 | 8.851E-10 | 3.196E-06 | set2         | 350 | GO_POSITIVE_REGULATION_OF_CELL_DEVELOPMENT                      |
| 130 | 2.947E-07 | 1.064E-03 | intersection | 74  | GO_CELL_MORPHOGENESIS_INVOLVED_IN_DIFFERENTIATION               |
| 131 | 5.398E-12 | 1.949E-08 | set1         | 355 | GO_CELL_MORPHOGENESIS_INVOLVED_IN_DIFFERENTIATION               |
| 132 | 5.068E-07 | 1.830E-03 | set2         | 382 | GO_CELL_MORPHOGENESIS_INVOLVED_IN_DIFFERENTIATION               |
| 133 | 7.329E-03 | 1.000E+00 | intersection | 49  | GO_POSITIVE_REGULATION_OF_NERVOUS_SYSTEM_DEVELOPMENT            |
| 134 | 2.761E-16 | 9.968E-13 | set1         | 380 | GO_POSITIVE_REGULATION_OF_NERVOUS_SYSTEM_DEVELOPMENT            |
| 135 | 3.507E-11 | 1.266E-07 | set2         | 325 | GO_POSITIVE_REGULATION_OF_NERVOUS_SYSTEM_DEVELOPMENT            |
| 136 | 4.344E-02 | 1.000E+00 | intersection | 13  | CHYLA_CBFA2T3_TARGETS_UP                                        |
| 137 | 4.305E-17 | 1.555E-13 | set1         | 416 | CHYLA_CBFA2T3_TARGETS_UP                                        |
| 138 | 4.758E-13 | 1.718E-09 | set2         | 311 | CHYLA_CBFA2T3_TARGETS_UP                                        |
| 139 | 1.896E-02 | 1.000E+00 | intersection | 19  | VERHAAK_AML_WITH_NPM1_MUTATED_DN                                |
| 140 | 2.985E-16 | 1.078E-12 | set1         | 410 | VERHAAK_AML_WITH_NPM1_MUTATED_DN                                |
| 141 | 3.932E-12 | 1.420E-08 | set2         | 186 | VERHAAK_AML_WITH_NPM1_MUTATED_DN                                |
| 142 | 7.166E-05 | 2.588E-01 | intersection | 52  | GO_REGULATION_OF_CELL_MORPHOGENESIS_INVOLVED_IN_DIFFERENTIATION |
| 143 | 1.009E-14 | 3.645E-11 | set1         | 377 | GO_REGULATION_OF_CELL_MORPHOGENESIS_INVOLVED_IN_DIFFERENTIATION |
| 144 | 8.985E-09 | 3.244E-05 | set2         | 252 | GO_REGULATION_OF_CELL_MORPHOGENESIS_INVOLVED_IN_DIFFERENTIATION |
| 145 | 5.122E-02 | 1.000E+00 | intersection | 12  | WALLACE_PROSTATE_CANCER_RACE_UP                                 |
| 146 | 3.360E-17 | 1.213E-13 | set1         | 417 | WALLACE_PROSTATE_CANCER_RACE_UP                                 |
| 147 | 1.301E-12 | 4.698E-09 | set2         | 220 | WALLACE_PROSTATE_CANCER_RACE_UP                                 |

From the second gene set to the 50<sup>th</sup> gene set, we calculate the adjusted  $p$ -values for their intersection with the top first gene set as well as the disjoint parts.  $P$ -values were determined by two-sided Wald test and adjusted by Bonferroni correction.

**Supplementary Table 11. Results for the top first gene set GO:0044425 (obsolete membrane part) with the combinations of the top 50 gene sets in mouse neuron cell scRNA-seq dataset**

|    | <i>P</i> -value | Adjusted <i>p</i> -value | Set          | Count | Set2       |
|----|-----------------|--------------------------|--------------|-------|------------|
| 1  | 5.530E-40       | 1.865E-36                | intersection | 674   | GO:0043005 |
| 2  | 4.480E-22       | 1.511E-18                | dis1         | 3014  | GO:0043005 |
| 3  | 4.015E-10       | 1.354E-06                | dis2         | 447   | GO:0043005 |
| 4  | 1.497E-50       | 5.047E-47                | intersection | 2021  | GO:0071944 |
| 5  | 1.346E-06       | 4.538E-03                | dis1         | 1667  | GO:0071944 |
| 6  | 2.991E-02       | 1.000E+00                | dis2         | 819   | GO:0071944 |
| 7  | 2.696E-55       | 9.092E-52                | intersection | 3688  | GO:0016020 |
| 8  | NA              | NA                       | dis1         | 0     | GO:0016020 |
| 9  | 9.927E-01       | 1.000E+00                | dis2         | 1393  | GO:0016020 |
| 10 | 1.179E-40       | 3.975E-37                | intersection | 878   | GO:0097458 |
| 11 | 3.187E-19       | 1.075E-15                | dis1         | 2810  | GO:0097458 |
| 12 | 2.933E-09       | 9.890E-06                | dis2         | 594   | GO:0097458 |
| 13 | 1.920E-51       | 6.474E-48                | intersection | 2011  | GO:0005886 |
| 14 | 2.378E-06       | 8.018E-03                | dis1         | 1677  | GO:0005886 |
| 15 | 6.089E-02       | 1.000E+00                | dis2         | 751   | GO:0005886 |
| 16 | 3.846E-42       | 1.297E-38                | intersection | 2845  | GO:0031224 |
| 17 | 2.248E-09       | 7.580E-06                | dis1         | 843   | GO:0031224 |
| 18 | NA              | NA                       | dis2         | 0     | GO:0031224 |
| 19 | 5.979E-39       | 2.016E-35                | intersection | 1498  | GO:0044459 |
| 20 | 1.320E-14       | 4.452E-11                | dis1         | 2190  | GO:0044459 |
| 21 | NA              | NA                       | dis2         | 0     | GO:0044459 |
| 22 | 1.269E-36       | 4.278E-33                | intersection | 731   | GO:0045202 |
| 23 | 3.134E-23       | 1.057E-19                | dis1         | 2957  | GO:0045202 |
| 24 | 1.383E-05       | 4.665E-02                | dis2         | 377   | GO:0045202 |
| 25 | 8.956E-33       | 3.020E-29                | intersection | 801   | GO:0006811 |
| 26 | 1.326E-23       | 4.470E-20                | dis1         | 2887  | GO:0006811 |
| 27 | 6.015E-07       | 2.028E-03                | dis2         | 177   | GO:0006811 |
| 28 | 1.192E-33       | 4.018E-30                | intersection | 630   | GO:0044456 |
| 29 | 7.006E-26       | 2.363E-22                | dis1         | 3058  | GO:0044456 |
| 30 | 1.153E-05       | 3.888E-02                | dis2         | 237   | GO:0044456 |
| 31 | 3.137E-37       | 1.058E-33                | intersection | 2758  | GO:0016021 |
| 32 | 1.562E-13       | 5.266E-10                | dis1         | 930   | GO:0016021 |
| 33 | NA              | NA                       | dis2         | 0     | GO:0016021 |
| 34 | 4.903E-30       | 1.653E-26                | intersection | 578   | GO:0006812 |

|    |           |           |              |      |            |
|----|-----------|-----------|--------------|------|------------|
| 35 | 9.523E-28 | 3.211E-24 | dis1         | 3110 | GO:0006812 |
| 36 | 5.887E-07 | 1.985E-03 | dis2         | 121  | GO:0006812 |
| 37 | 9.344E-32 | 3.151E-28 | intersection | 293  | GO:0030424 |
| 38 | 3.914E-33 | 1.320E-29 | dis1         | 3395 | GO:0030424 |
| 39 | 5.490E-06 | 1.851E-02 | dis2         | 158  | GO:0030424 |
| 40 | 4.050E-38 | 1.366E-34 | intersection | 862  | GO:0120025 |
| 41 | 1.999E-20 | 6.740E-17 | dis1         | 2826 | GO:0120025 |
| 42 | 1.721E-03 | 1.000E+00 | dis2         | 726  | GO:0120025 |
| 43 | 2.452E-28 | 8.269E-25 | intersection | 475  | GO:0036477 |
| 44 | 2.004E-30 | 6.757E-27 | dis1         | 3213 | GO:0036477 |
| 45 | 4.887E-07 | 1.648E-03 | dis2         | 308  | GO:0036477 |
| 46 | 2.091E-30 | 7.052E-27 | intersection | 256  | GO:0015672 |
| 47 | 4.665E-34 | 1.573E-30 | dis1         | 3432 | GO:0015672 |
| 48 | 1.107E-03 | 1.000E+00 | dis2         | 50   | GO:0015672 |
| 49 | 5.395E-31 | 1.819E-27 | intersection | 101  | GO:0098800 |
| 50 | 4.154E-39 | 1.401E-35 | dis1         | 3587 | GO:0098800 |
| 51 | NA        | NA        | dis2         | 0    | GO:0098800 |
| 52 | 3.955E-37 | 1.334E-33 | intersection | 905  | GO:0042995 |
| 53 | 1.176E-20 | 3.964E-17 | dis1         | 2783 | GO:0042995 |
| 54 | 7.495E-03 | 1.000E+00 | dis2         | 821  | GO:0042995 |
| 55 | 3.923E-29 | 1.323E-25 | intersection | 360  | GO:0043269 |
| 56 | 2.379E-32 | 8.022E-29 | dis1         | 3328 | GO:0043269 |
| 57 | 1.795E-03 | 1.000E+00 | dis2         | 106  | GO:0043269 |
| 58 | 3.216E-29 | 1.085E-25 | intersection | 117  | GO:0098798 |
| 59 | 6.701E-40 | 2.259E-36 | dis1         | 3571 | GO:0098798 |
| 60 | 9.999E-01 | 1.000E+00 | dis2         | 9    | GO:0098798 |
| 61 | 2.585E-17 | 8.716E-14 | intersection | 113  | GO:0043209 |
| 62 | 9.816E-44 | 3.310E-40 | dis1         | 3575 | GO:0043209 |
| 63 | 2.775E-13 | 9.358E-10 | dis2         | 66   | GO:0043209 |
| 64 | 4.657E-31 | 1.570E-27 | intersection | 1012 | GO:0032879 |
| 65 | 1.029E-22 | 3.471E-19 | dis1         | 2676 | GO:0032879 |
| 66 | 4.442E-03 | 1.000E+00 | dis2         | 911  | GO:0032879 |
| 67 | 4.250E-29 | 1.433E-25 | intersection | 780  | GO:0051049 |
| 68 | 3.641E-26 | 1.228E-22 | dis1         | 2908 | GO:0051049 |
| 69 | 1.794E-03 | 1.000E+00 | dis2         | 527  | GO:0051049 |
| 70 | 3.048E-27 | 1.028E-23 | intersection | 181  | GO:0044455 |
| 71 | 1.043E-38 | 3.516E-35 | dis1         | 3507 | GO:0044455 |
| 72 | NA        | NA        | dis2         | 0    | GO:0044455 |



|     |           |           |              |      |            |
|-----|-----------|-----------|--------------|------|------------|
| 73  | 1.869E-24 | 6.304E-21 | intersection | 480  | GO:0034220 |
| 74  | 1.894E-32 | 6.386E-29 | dis1         | 3208 | GO:0034220 |
| 75  | 1.537E-03 | 1.000E+00 | dis2         | 80   | GO:0034220 |
| 76  | 3.455E-26 | 1.165E-22 | intersection | 785  | GO:0031226 |
| 77  | 7.877E-28 | 2.656E-24 | dis1         | 2903 | GO:0031226 |
| 78  | NA        | NA        | dis2         | 0    | GO:0031226 |
| 79  | 5.315E-23 | 1.792E-19 | intersection | 360  | GO:0030425 |
| 80  | 1.155E-35 | 3.896E-32 | dis1         | 3328 | GO:0030425 |
| 81  | 5.021E-05 | 1.693E-01 | dis2         | 197  | GO:0030425 |
| 82  | 1.638E-25 | 5.525E-22 | intersection | 351  | GO:0098793 |
| 83  | 4.132E-34 | 1.393E-30 | dis1         | 3337 | GO:0098793 |
| 84  | 2.928E-02 | 1.000E+00 | dis2         | 93   | GO:0098793 |
| 85  | 1.611E-22 | 5.432E-19 | intersection | 373  | GO:0099536 |
| 86  | 1.186E-35 | 4.001E-32 | dis1         | 3315 | GO:0099536 |
| 87  | 1.159E-04 | 3.910E-01 | dis2         | 153  | GO:0099536 |
| 88  | 5.901E-25 | 1.990E-21 | intersection | 785  | GO:0098590 |
| 89  | 3.558E-28 | 1.200E-24 | dis1         | 2903 | GO:0098590 |
| 90  | NA        | NA        | dis2         | 0    | GO:0098590 |
| 91  | 1.415E-20 | 4.771E-17 | intersection | 241  | GO:0042391 |
| 92  | 4.186E-39 | 1.411E-35 | dis1         | 3447 | GO:0042391 |
| 93  | 2.728E-05 | 9.198E-02 | dis2         | 75   | GO:0042391 |
| 94  | 5.804E-25 | 1.957E-21 | intersection | 742  | GO:0005887 |
| 95  | 3.588E-29 | 1.210E-25 | dis1         | 2946 | GO:0005887 |
| 96  | NA        | NA        | dis2         | 0    | GO:0005887 |
| 97  | 5.966E-23 | 2.012E-19 | intersection | 371  | GO:0098660 |
| 98  | 6.335E-35 | 2.136E-31 | dis1         | 3317 | GO:0098660 |
| 99  | 8.762E-03 | 1.000E+00 | dis2         | 59   | GO:0098660 |
| 100 | 1.034E-21 | 3.488E-18 | intersection | 367  | GO:0099537 |
| 101 | 6.286E-36 | 2.120E-32 | dis1         | 3321 | GO:0099537 |
| 102 | 1.136E-04 | 3.831E-01 | dis2         | 151  | GO:0099537 |
| 103 | 6.685E-23 | 2.254E-19 | intersection | 393  | GO:0008324 |
| 104 | 8.238E-35 | 2.778E-31 | dis1         | 3295 | GO:0008324 |
| 105 | 1.176E-02 | 1.000E+00 | dis2         | 11   | GO:0008324 |
| 106 | 3.790E-21 | 1.278E-17 | intersection | 359  | GO:0098916 |
| 107 | 1.765E-36 | 5.952E-33 | dis1         | 3329 | GO:0098916 |
| 108 | 1.189E-04 | 4.008E-01 | dis2         | 151  | GO:0098916 |
| 109 | 7.078E-21 | 2.387E-17 | intersection | 359  | GO:0007268 |
| 110 | 2.232E-36 | 7.526E-33 | dis1         | 3329 | GO:0007268 |

|     |           |           |              |      |            |
|-----|-----------|-----------|--------------|------|------------|
| 111 | 9.247E-05 | 3.118E-01 | dis2         | 151  | GO:0007268 |
| 112 | 2.722E-02 | 1.000E+00 | intersection | 330  | GO:0090304 |
| 113 | 3.493E-53 | 1.178E-49 | dis1         | 3358 | GO:0090304 |
| 114 | 1.120E-27 | 3.776E-24 | dis2         | 2777 | GO:0090304 |
| 115 | 7.064E-22 | 2.382E-18 | intersection | 683  | GO:0055085 |
| 116 | 8.823E-32 | 2.975E-28 | dis1         | 3005 | GO:0055085 |
| 117 | 1.605E-02 | 1.000E+00 | dis2         | 102  | GO:0055085 |
| 118 | 4.873E-22 | 1.643E-18 | intersection | 342  | GO:0098662 |
| 119 | 4.432E-36 | 1.494E-32 | dis1         | 3346 | GO:0098662 |
| 120 | 6.972E-03 | 1.000E+00 | dis2         | 58   | GO:0098662 |
| 121 | 1.646E-23 | 5.549E-20 | intersection | 218  | GO:0015077 |
| 122 | 8.758E-38 | 2.953E-34 | dis1         | 3470 | GO:0015077 |
| 123 | 8.318E-01 | 1.000E+00 | dis2         | 4    | GO:0015077 |
| 124 | 6.827E-21 | 2.302E-17 | intersection | 383  | GO:0098655 |
| 125 | 2.886E-36 | 9.730E-33 | dis1         | 3305 | GO:0098655 |
| 126 | 1.314E-03 | 1.000E+00 | dis2         | 68   | GO:0098655 |
| 127 | 1.083E-23 | 3.652E-20 | intersection | 63   | GO:0070469 |
| 128 | 4.485E-44 | 1.512E-40 | dis1         | 3625 | GO:0070469 |
| 129 | NA        | NA        | dis2         | 0    | GO:0070469 |
| 130 | 4.109E-23 | 1.386E-19 | intersection | 395  | GO:0097060 |
| 131 | 3.080E-35 | 1.039E-31 | dis1         | 3293 | GO:0097060 |
| 132 | NA        | NA        | dis2         | 0    | GO:0097060 |
| 133 | 3.118E-21 | 1.051E-17 | intersection | 533  | GO:0003008 |
| 134 | 1.141E-33 | 3.846E-30 | dis1         | 3155 | GO:0003008 |
| 135 | 1.467E-04 | 4.948E-01 | dis2         | 442  | GO:0003008 |
| 136 | 4.334E-37 | 1.462E-33 | intersection | 1475 | GO:0023052 |
| 137 | 8.699E-16 | 2.933E-12 | dis1         | 2213 | GO:0023052 |
| 138 | 6.475E-01 | 1.000E+00 | dis2         | 1929 | GO:0023052 |
| 139 | 1.886E-22 | 6.361E-19 | intersection | 60   | GO:0005746 |
| 140 | 1.995E-44 | 6.726E-41 | dis1         | 3628 | GO:0005746 |
| 141 | NA        | NA        | dis2         | 0    | GO:0005746 |
| 142 | 9.501E-01 | 1.000E+00 | intersection | 97   | GO:0003676 |
| 143 | 1.564E-56 | 5.274E-53 | dis1         | 3591 | GO:0003676 |
| 144 | 1.962E-22 | 6.615E-19 | dis2         | 2122 | GO:0003676 |
| 145 | 2.839E-17 | 9.573E-14 | intersection | 303  | GO:0007186 |
| 146 | 1.206E-39 | 4.065E-36 | dis1         | 3385 | GO:0007186 |
| 147 | 6.985E-06 | 2.355E-02 | dis2         | 90   | GO:0007186 |

From the second gene set to the 50<sup>th</sup> gene set, we calculate the adjusted  $p$ -values for their intersection with the top first gene set as well as the disjoint parts.  $P$ -values were determined by two-sided Wald test and adjusted by Bonferroni correction.

## Supplementary References

- 1 Conway, J. R., Lex, A. & Gehlenborg, N. UpSetR: an R package for the visualization of intersecting sets and their properties. *Bioinformatics* **33**, 2938-2940, doi:10.1093/bioinformatics/btx364 (2017).
- 2 Louis, T. A. Finding the Observed Information Matrix When Using the Em Algorithm. *J Roy Stat Soc B Met* **44**, 226-233 (1982).
- 3 Oakes, D. Direct calculation of the information matrix via the EM algorithm. *J Roy Stat Soc B* **61**, 479-482, doi:Doi 10.1111/1467-9868.00188 (1999).
- 4 Tuch, B. B. *et al.* Tumor transcriptome sequencing reveals allelic expression imbalances associated with copy number alterations. *PLoS One* **5**, e9317, doi:10.1371/journal.pone.0009317 (2010).
- 5 Shah, M. Y. & Mehta, A. R. Metastasis from breast cancer presenting as an epulis in the upper gingiva. *J Oral Maxillofac Pathol* **13**, 38-40, doi:10.4103/0973-029X.48756 (2009).
- 6 Daly, M. E. *et al.* Intensity-modulated radiotherapy for locally advanced cancers of the larynx and hypopharynx. *Head Neck* **33**, 103-111, doi:10.1002/hed.21406 (2011).
- 7 Pickup, M. W., Mouw, J. K. & Weaver, V. M. The extracellular matrix modulates the hallmarks of cancer. *EMBO Rep* **15**, 1243-1253, doi:10.15252/embr.201439246 (2014).
- 8 Mazzoccoli, G. *et al.* A primary tumor gene expression signature identifies a crucial role played by tumor stroma myofibroblasts in lymph node involvement in oral squamous cell carcinoma. *Oncotarget* **8**, 104913-104927, doi:10.18632/oncotarget.20645 (2017).
- 9 Usoskin, D. *et al.* Unbiased classification of sensory neuron types by large-scale single-cell RNA sequencing. *Nat Neurosci* **18**, 145-153, doi:10.1038/nn.3881 (2015).
- 10 Salahshourifar, I. *et al.* Downregulation of CRNN gene and genomic instability at 1q21.3 in oral squamous cell carcinoma. *Clin Oral Investig* **19**, 2273-2283, doi:10.1007/s00784-015-1467-7 (2015).
- 11 Uraguchi, M., Morikawa, M., Shirakawa, M., Sanada, K. & Imai, K. Activation of WNT family expression and signaling in squamous cell carcinomas of the oral cavity. *J Dent Res* **83**, 327-332, doi:10.1177/154405910408300411 (2004).
- 12 Lv, Z. *et al.* Parathyroid hormone-related protein serves as a prognostic indicator in oral squamous cell carcinoma. *J Exp Clin Cancer Res* **33**, 100, doi:10.1186/s13046-014-0100-y (2014).
- 13 Harris, T. M. *et al.* Proteomic analysis of oral cavity squamous cell carcinoma specimens identifies patient outcome-associated proteins. *Arch Pathol Lab Med* **139**, 494-507, doi:10.5858/arpa.2014-0131-OA (2015).
- 14 Zhi, X. *et al.* Expression levels of insulin-like growth factors 1 and 2 in head and neck squamous cell carcinoma. *Growth Horm IGF Res* **24**, 137-141, doi:10.1016/j.ghir.2014.04.003 (2014).

- 15 Akiyama, K. *et al.* The F-prostaglandin receptor is a novel marker for tumor endothelial cells in renal cell carcinoma. *Pathol Int* **63**, 37-44, doi:10.1111/pin.12031 (2013).
- 16 Cheng, C. W. *et al.* Loss of GDF10/BMP3b as a prognostic marker collaborates with TGFBR3 to enhance chemotherapy resistance and epithelial-mesenchymal transition in oral squamous cell carcinoma. *Mol Carcinog* **55**, 499-513, doi:10.1002/mc.22297 (2016).
- 17 Guo, J. B. *et al.* Network and pathway-based analysis of microRNA role in neuropathic pain in rat models. *J Cell Mol Med* **23**, 4534-4544, doi:10.1111/jcmm.14357 (2019).
- 18 Minis, A. *et al.* Subcellular transcriptomics-dissection of the mRNA composition in the axonal compartment of sensory neurons. *Dev Neurobiol* **74**, 365-381, doi:10.1002/dneu.22140 (2014).
- 19 Gilman, S. R. *et al.* Rare de novo variants associated with autism implicate a large functional network of genes involved in formation and function of synapses. *Neuron* **70**, 898-907, doi:10.1016/j.neuron.2011.05.021 (2011).
- 20 Hubel, K. A. Intestinal nerves and ion transport: stimuli, reflexes, and responses. *Am J Physiol* **248**, G261-271, doi:10.1152/ajpgi.1985.248.3.G261 (1985).
- 21 Jiang, Z. & Gentleman, R. Extensions to gene set enrichment. *Bioinformatics* **23**, 306-313, doi:10.1093/bioinformatics/btl599 (2007).
- 22 Baron, C. S. *et al.* Cell Type Purification by Single-Cell Transcriptome-Trained Sorting. *Cell* **179**, 527-542 e519, doi:10.1016/j.cell.2019.08.006 (2019).
